# Supplementary material for: Whole-genome DNA methylome analysis of different developmental stages of the entomopathogenic fungus Beauveria bassiana NCHU-157 by nanopore sequencing
Source: Front Genet. 2023 Jan 18;14:1085631. doi: 10.3389/fgene.2023.1085631 (PMC9889659; doi:10.3389/fgene.2023.1085631)
Supplement: Supplementary file 5 [file DataSheet1.xlsx]

## Sheet: Supplementary _Table_1
Supplementary Table 1. Primers used in this study.
Primer name	Usage	Primer sequence (5' to 3')	Amplicon size (bp)	Reference gene ID	Reference
Bb_γ-actin_F	qRT-PCR	GTCAAGTCATCACCATTGGC	150	HQ232398	Yang et al., 2016
Bb_γ-actin_R	qRT-PCR	CGTAGAGATCCTTGCGAACA
Bb_Dim2_F	qRT-PCR	AGAGGCCATGACGTTTTCAG	83	XM_008599996.1、XP_008598218.1	Designed in this study
Bb_Dim2_R	qRT-PCR	AGGGCATCCAACAAGACAAG
Bb_C5_F	qRT-PCR	GTTTGGCGGAAACGGTACTA	91	XM_008597459、XP_008595681.1	Designed in this study
Bb_C5_R	qRT-PCR	AGCTTCGGGGTTATGGAGAT
BS_2721000_2721200_F	BS-PCR	ATGGGAATAAGGATTAGGTAGATTAGG	279	This study	Designed in this study
BS_2721000_2721200_R	BS-PCR	TCAACATCCAATAAAACTTCAACAT
BS_28680_287000_F	BS-PCR	GGAGGGAATTAAAAGTATGAAGTATTA	341	This study	Designed in this study
BS_28680_287000_R	BS-PCR	CCAAATTCTATAAATCCACACCTAC
BS_880200_880400_F	BS-PCR	GAGTAAGAAGTTGGAAAAGATTTATAG	286	This study	Designed in this study
BS_880200_880400_R	BS-PCR	AATACCTACTAAATAAACATCCTATTACC
BS_146_F	BS-PCR	GTGAAGTGTTGATTGAGTAATAA	309	This study	Designed in this study
BS_146_R	BS-PCR	AAAAACTCTTACAAAAACCATAAAC
BS_235_F	BS-PCR	ATGGTAGATATTAAAGTTGGAGTAAG	328	This study	Designed in this study
BS_235_R	BS-PCR	CATATCCCTTTCCCATAACCTAA

## Sheet: Supplementary Table 2
Supplementary Table 2. NGS library summary
	Reads No.	%
Raw reads (PE)	2942240	-
Quality reads (PE)	2196476	74.7
Estimated bases	4718552872	-
Quality bases	3817896159	80.9
Others (Unpaired )	900656713	19.1

## Sheet: Supplementary Table 3
Supplementary Table 3. Nanopore sequencing summary of first replicate for reference genome assembly
	Conidia		Mycelium		Conidia+Mycelium
	Reads No.	%	Reads No.	%	Reads No.	%
Raw reads	2779850	-	2594340	-	6476130	-
Quality reads	2687450	96.6761	2321324	89.4765	6308250	97.4077
Estimated bases	2911775548	-	2954043356	-	5894453424	-
Quality bases	2830524381	97.2096	2928125590	99.1226	5832493383	98.9488
Contig N50 (bp)	5059595	-	622490	-	4380399	-
Contig N90 (bp)	4504533	-	154454	-	1443135	-
Raw read N50 (bp)	10949	-	4650	-	9958	-
Raw read N90 (bp)	2950	-	1433	-	1631	-
Longest read (bp)	653249	-	1070188	-	1070188	-
Others or the reads not belong to B. bassiana	81251167	0.0279043	25917766	0.00877366	61960041	0.0105116

## Sheet: Supplementary Table  4
Supplementary Table 4. Genome assembly of Beauveria bassiana NCHU-157 based on nanopore sequencing data
Assembled genome	Conidia	Mecylium
contigs	11	114
Largest contig (bp)	6159167	1652333
Total length (bp)	34056893	33771776
Coverage	~84X	~75X
GC (%)	50.53	50.56
N50 (bp)	5059595	622490
L50	4	18
N90 (bp)	4504533	154454
L90	6	55
Total protein coding genes	11243	13903
Gene density (gene/Mb)	330.12	411.68
Number of exons	33019	43350
Number of exons per gene (med)	3	2
mitochondria genome size (bp)	85024	48060
Number of tRNA	181	154
Number of secondary metabolize	35	7
TE density	4.4	5.5

## Sheet: Supplementary Table 5
Supplementary Table 5. Combined genome contig lengths
Contig No.	Length (bp)
1	9176171
2	4604702
3	4380400
4	2675614
5	2420851
6	2389106
7	2186205
8	2184499
9	1443135
10	1374581
11	509391
12	297442
13	245128
14	162722
15	83709
16*	56240
*= Mitochondria

## Sheet: Supplementary Table 6
Supplementary Table 6. Nanopore sequencing summary for thee replicates
	Conidia-1	Conidia-2	Conidia-3	Mycelium-1	Mycelium-2	Mycelium-3
	Reads No.	Reads No.	Reads No.	Reads No.	Reads No.	Reads No.
Raw reads	2779850	513597	306887	2594340	882668	1565281
Estimated bases	2911775548	789075345	1028169181	2954043356	1143224566	1611192821
Read N50 (bp)	10949	2964	10233	4650	1962	1439
Read N90 (bp)	2950	620	1425	1433	581	478
Longest read	653249	346551	110825	1070188	55089	105071

## Sheet: Supplementary Table 7
Supplementary Table 7. GO analysis of differentially methylated genes (DMGs) with CG hypermethylation
Category	GO ID	Total read count	DMG count	GO term	Local gene IDs*	p-value	q-value
Biological Process	GO:0008150	2240	55	biological_process	gene_08833;gene_09192;gene_00976;gene_09390;gene_08922;gene_02300;gene_03812;gene_06979;gene_00155;gene_07146;gene_05464;gene_05465;gene_09014;gene_04447;gene_05326;gene_01496;gene_07969;gene_02477;gene_00458;gene_03085;gene_04559;gene_09275;gene_02357;gene_03282;gene_08815;gene_04329;gene_05392;gene_00187;gene_00023;gene_04538;gene_07901;gene_05543;gene_08960;gene_07340;gene_05363;gene_03020;gen…	0.195493	0.217368
	GO:0055114	513	9	oxidation-reduction process	gene_00662;gene_05128;gene_10403;gene_10414;gene_00977;gene_02499;gene_02996;gene_04780;gene_06466	0.726275	0.734488
	GO:0055085	429	8	transmembrane transport	gene_01921;gene_01015;gene_02271;gene_09639;gene_10402;gene_10565;gene_07178;gene_04939	0.634387	0.646786
	GO:0006355	309	12	regulation of transcription, DNA-templated	gene_05124;gene_09216;gene_07339;gene_07383;gene_01598;gene_05709;gene_06345;gene_03086;gene_04834;gene_09561;gene_04997;gene_10080	0.0219618	0.0358412
	GO:0008152	279	3	metabolic process	gene_04039;gene_03015;gene_00695	0.879134	0.881952
	GO:0006351	175	8	transcription, DNA-templated	gene_02178;gene_07312;gene_07339;gene_05709;gene_06345;gene_03086;gene_09561;gene_10080	0.0171157	0.0288798
	GO:0006508	170	5	proteolysis	gene_00749;gene_01569;gene_02074;gene_01119;gene_06120	0.184222	0.207043
	GO:0005975	125	2	carbohydrate metabolic process	gene_07339;gene_03624	0.537188	0.552183
	GO:0006468	118	4	protein phosphorylation	gene_01839;gene_10398;gene_01515;gene_01584	0.126755	0.147763
	GO:0035690	113	2	cellular response to drug	gene_10406;gene_08577	0.469542	0.48584
	GO:0006412	108	1	translation	gene_10413	0.703542	0.716126
	GO:0016310	100	5	phosphorylation	gene_01839;gene_10398;gene_01515;gene_10472;gene_01584	0.0249588	0.0397563
	GO:0031505	93	6	fungal-type cell wall organization	gene_00749;gene_10406;gene_02350;gene_01282;gene_06081;gene_03624	0.00484019	0.0111396
	GO:0006886	88	1	intracellular protein transport	gene_04896	0.593043	0.60562
	GO:0030447	87	2	filamentous growth	gene_03016;gene_03393	0.311572	0.331144
	GO:0006281	85	4	DNA repair	gene_10563;gene_01845;gene_05541;gene_01618	0.0422574	0.0602576
	GO:0045944	84	8	positive regulation of transcription by RNA polymerase II	gene_10563;gene_00082;gene_01494;gene_01158;gene_06924;gene_10398;gene_07382;gene_02507	0.000104456	0.000895745
	GO:0006357	79	7	regulation of transcription by RNA polymerase II	gene_08180;gene_08166;gene_00082;gene_01494;gene_05709;gene_04766;gene_01618	0.000375824	0.00228407
	GO:0000122	75	4	negative regulation of transcription by RNA polymerase II	gene_01494;gene_06384;gene_05023;gene_02507	0.0265407	0.0421687
	GO:0034599	69	3	cellular response to oxidative stress	gene_00082;gene_10472;gene_03157	0.0693957	0.0886566
	GO:0035556	67	3	intracellular signal transduction	gene_01071;gene_10398;gene_01584	0.0636445	0.083003
	GO:0006511	65	2	ubiquitin-dependent protein catabolic process	gene_02342;gene_10510	0.179692	0.202316
	GO:0009267	64	3	cellular response to starvation	gene_01119;gene_03016;gene_10398	0.0555111	0.0737791
	GO:0030448	63	4	hyphal growth	gene_03393;gene_00805;gene_10510;gene_04834	0.0133863	0.0239423
	GO:0007165	62	3	signal transduction	gene_01839;gene_07387;gene_10294	0.0504222	0.0689177
	GO:0009405	61	3	pathogenesis	gene_10406;gene_03393;gene_01270	0.0479786	0.0670416
	GO:0006974	60	2	cellular response to DNA damage stimulus	gene_05541;gene_01618	0.152182	0.17448
	GO:0036180	60	1	filamentous growth of a population of unicellular organisms in response to biotic stimulus	gene_03016	0.3926	0.410982
	GO:0006897	57	1	endocytosis	gene_08577	0.368426	0.386323
	GO:0006338	54	3	chromatin remodeling	gene_10563;gene_07383;gene_01618	0.032767	0.0492662
	GO:0006629	51	1	lipid metabolic process	gene_08114	0.319061	0.337956
	GO:0036170	49	1	filamentous growth of a population of unicellular organisms in response to starvation	gene_03016	0.302385	0.321926
	GO:0019748	48	1	secondary metabolic process	gene_10406	0.294019	0.314089
	GO:0071555	44	1	cell wall organization	gene_01282	0.260465	0.280157
	GO:0016567	43	1	protein ubiquitination	gene_04412	0.252074	0.271597
	GO:0016236	40	1	macroautophagy	gene_01493	0.226964	0.247957
	GO:0006811	38	1	ion transport	gene_04939	0.210328	0.231398
	GO:0007049	37	2	cell cycle	gene_02507;gene_01584	0.0497895	0.0685016
	GO:0006091	37	1	generation of precursor metabolites and energy	gene_03208	0.202058	0.22427
	GO:0034605	36	1	cellular response to heat	gene_10398	0.193827	0.2159
	GO:0018105	33	2	peptidyl-serine phosphorylation	gene_01839;gene_10398	0.0372958	0.0544223
	GO:0032543	31	2	mitochondrial translation	gene_06501;gene_10293	0.0317395	0.0484608
	GO:0006348	31	1	chromatin silencing at telomere	gene_10563	0.153491	0.175338
	GO:0042273	31	1	ribosomal large subunit biogenesis	gene_06502	0.153491	0.175338
	GO:0006366	30	3	transcription by RNA polymerase II	gene_10563;gene_07383;gene_01618	0.00430026	0.0111218
	GO:0007264	30	3	small GTPase mediated signal transduction	gene_03393;gene_01978;gene_03354	0.00430026	0.0111218
	GO:0006633	30	2	fatty acid biosynthetic process	gene_09965;gene_01079	0.0291375	0.0445968
	GO:0000723	29	1	telomere maintenance	gene_02224	0.137869	0.15836
	GO:0006644	29	1	phospholipid metabolic process	gene_03016	0.137869	0.15836
	GO:0009073	29	1	aromatic amino acid family biosynthetic process	gene_05969	0.137869	0.15836
	GO:0045454	28	1	cell redox homeostasis	gene_07937	0.130199	0.151215
	GO:0006520	27	2	cellular amino acid metabolic process	gene_05128;gene_08801	0.0220429	0.0358412
	GO:0051321	27	2	meiotic cell cycle	gene_04387;gene_10398	0.0220429	0.0358412
	GO:0006915	27	1	apoptotic process	gene_01584	0.122634	0.143494
	GO:0007163	27	1	establishment or maintenance of cell polarity	gene_03393	0.122634	0.143494
	GO:0010468	27	1	regulation of gene expression	gene_01071	0.122634	0.143494
	GO:0006812	26	1	cation transport	gene_04939	0.115183	0.13579
	GO:0006879	26	1	cellular iron ion homeostasis	gene_01628	0.115183	0.13579
	GO:0009847	26	1	spore germination	gene_10406	0.115183	0.13579
	GO:0010106	26	1	cellular response to iron ion starvation	gene_10406	0.115183	0.13579
	GO:0046777	25	2	protein autophosphorylation	gene_10398;gene_01584	0.0179084	0.0300554
	GO:0070787	25	2	conidiophore development	gene_00805;gene_04834	0.0179084	0.0300554
	GO:0030433	25	1	ubiquitin-dependent ERAD pathway	gene_10510	0.107855	0.12885
	GO:0007015	24	2	actin filament organization	gene_03393;gene_08577	0.0160194	0.0276368
	GO:0006368	23	1	transcription elongation from RNA polymerase II promoter	gene_07383	0.0936059	0.112687
	GO:0006979	23	1	response to oxidative stress	gene_00082	0.0936059	0.112687
	GO:0043386	23	1	mycotoxin biosynthetic process	gene_01568	0.0936059	0.112687
	GO:0000724	22	2	double-strand break repair via homologous recombination	gene_02224;gene_09030	0.0125948	0.0231282
	GO:0007131	22	2	reciprocal meiotic recombination	gene_02224;gene_02499	0.0125948	0.0231282
	GO:0000209	22	1	protein polyubiquitination	gene_02342	0.0867052	0.105804
	GO:0006099	22	1	tricarboxylic acid cycle	gene_06501	0.0867052	0.105804
	GO:0007005	22	1	mitochondrion organization	gene_03084	0.0867052	0.105804
	GO:0016573	22	1	histone acetylation	gene_07383	0.0867052	0.105804
	GO:0030476	22	1	ascospore wall assembly	gene_01282	0.0867052	0.105804
	GO:0044550	22	1	secondary metabolite biosynthetic process	gene_10080	0.0867052	0.105804
	GO:0000909	21	2	sporocarp development involved in sexual reproduction	gene_00805;gene_04834	0.0110574	0.0210393
	GO:0048315	21	2	conidium formation	gene_01598;gene_04834	0.0110574	0.0210393
	GO:0000002	21	1	mitochondrial genome maintenance	gene_02350	0.0799679	0.0991434
	GO:0006367	21	1	transcription initiation from RNA polymerase II promoter	gene_07383	0.0799679	0.0991434
	GO:0006486	21	1	protein glycosylation	gene_03624	0.0799679	0.0991434
	GO:0009058	21	1	biosynthetic process	gene_01664	0.0799679	0.0991434
	GO:0016042	21	1	lipid catabolic process	gene_02773	0.0799679	0.0991434
	GO:0016973	21	1	poly(A)+ mRNA export from nucleus	gene_09538	0.0799679	0.0991434
	GO:0023014	21	1	signal transduction by protein phosphorylation	gene_01515	0.0799679	0.0991434
	GO:0042144	21	1	vacuole fusion, non-autophagic	gene_06384	0.0799679	0.0991434
	GO:1900772	20	1	fumitremorgin B biosynthetic process	gene_10406	0.073405	0.0930193
	GO:0000245	19	1	spliceosomal complex assembly	gene_01071	0.067028	0.0859826
	GO:0006874	19	1	cellular calcium ion homeostasis	gene_01628	0.067028	0.0859826
	GO:0032147	19	1	activation of protein kinase activity	gene_01515	0.067028	0.0859826
	GO:1900781	19	1	fumiquinazoline C biosynthetic process	gene_10406	0.067028	0.0859826
	GO:0031098	18	1	stress-activated protein kinase signaling cascade	gene_01515	0.0608488	0.0798561
	GO:0006071	17	1	glycerol metabolic process	gene_04780	0.0548797	0.073251
	GO:0007275	17	1	multicellular organism development	gene_02507	0.0548797	0.073251
	GO:0043044	17	1	ATP-dependent chromatin remodeling	gene_10563	0.0548797	0.073251
	GO:0043486	17	1	histone exchange	gene_10563	0.0548797	0.073251
	GO:1900805	17	1	brevianamide F biosynthetic process	gene_10406	0.0548797	0.073251
	GO:1900809	17	1	fumigaclavine C biosynthetic process	gene_10406	0.0548797	0.073251
	GO:0009408	16	2	response to heat	gene_01598;gene_00805	0.00505547	0.0114664
	GO:0006525	16	1	arginine metabolic process	gene_02507	0.0491337	0.0677482
	GO:0007039	16	1	protein catabolic process in the vacuole	gene_01119	0.0491337	0.0677482
	GO:0030010	16	1	establishment of cell polarity	gene_06081	0.0491337	0.0677482
	GO:0042274	16	1	ribosomal small subunit biogenesis	gene_09538	0.0491337	0.0677482
	GO:0051123	16	1	RNA polymerase II preinitiation complex assembly	gene_07383	0.0491337	0.0677482
	GO:0016485	15	2	protein processing	gene_00749;gene_04387	0.00417602	0.0110303
	GO:0050684	15	1	regulation of mRNA processing	gene_01071	0.0436239	0.061093
	GO:0000160	14	3	phosphorelay signal transduction system	gene_10398;gene_10472;gene_03157	0.000208021	0.00169119
	GO:0006970	14	1	response to osmotic stress	gene_06081	0.0383642	0.0549565
	GO:0007031	14	1	peroxisome organization	gene_01492	0.0383642	0.0549565
	GO:0032436	14	1	positive regulation of proteasomal ubiquitin-dependent protein catabolic process	gene_02342	0.0383642	0.0549565
	GO:0055088	14	1	lipid homeostasis	gene_03084	0.0383642	0.0549565
	GO:0060303	14	1	regulation of nucleosome density	gene_10563	0.0383642	0.0549565
	GO:0030148	13	2	sphingolipid biosynthetic process	gene_00104;gene_10215	0.0027133	0.00777775
	GO:0000768	13	1	syncytium formation by plasma membrane fusion	gene_00805	0.0333688	0.0492662
	GO:0006301	13	1	postreplication repair	gene_09030	0.0333688	0.0492662
	GO:0006878	13	1	cellular copper ion homeostasis	gene_08598	0.0333688	0.0492662
	GO:0006882	13	1	cellular zinc ion homeostasis	gene_05023	0.0333688	0.0492662
	GO:0007095	13	1	mitotic G2 DNA damage checkpoint	gene_02224	0.0333688	0.0492662
	GO:0010389	13	1	regulation of G2/M transition of mitotic cell cycle	gene_10294	0.0333688	0.0492662
	GO:0030435	13	1	sporulation resulting in formation of a cellular spore	gene_01119	0.0333688	0.0492662
	GO:0031573	13	1	intra-S DNA damage checkpoint	gene_02224	0.0333688	0.0492662
	GO:0043087	13	1	regulation of GTPase activity	gene_03393	0.0333688	0.0492662
	GO:0001402	12	2	signal transduction involved in filamentous growth	gene_00749;gene_06081	0.00212205	0.00670912
	GO:0001403	12	2	invasive growth in response to glucose limitation	gene_04387;gene_01839	0.00212205	0.00670912
	GO:0006303	12	1	double-strand break repair via nonhomologous end joining	gene_02224	0.0286526	0.043962
	GO:0009409	12	1	response to cold	gene_00805	0.0286526	0.043962
	GO:0010972	12	1	negative regulation of G2/M transition of mitotic cell cycle	gene_10472	0.0286526	0.043962
	GO:0019236	12	1	response to pheromone	gene_01515	0.0286526	0.043962
	GO:0043066	12	1	negative regulation of apoptotic process	gene_08802	0.0286526	0.043962
	GO:0044011	12	1	single-species biofilm formation on inanimate substrate	gene_05709	0.0286526	0.043962
	GO:0051666	12	1	actin cortical patch localization	gene_03393	0.0286526	0.043962
	GO:0071805	12	1	potassium ion transmembrane transport	gene_04939	0.0286526	0.043962
	GO:0006302	11	2	double-strand break repair	gene_02224;gene_05541	0.00161818	0.00522156
	GO:0061408	11	2	positive regulation of transcription from RNA polymerase II promoter in response to heat stress	gene_00082;gene_10398	0.00161818	0.00522156
	GO:0071432	11	2	peptide mating pheromone maturation involved in positive regulation of conjugation with cellular fusion	gene_00749;gene_06685	0.00161818	0.00522156
	GO:0001934	11	1	positive regulation of protein phosphorylation	gene_07387	0.0242308	0.0386951
	GO:0006378	11	1	mRNA polyadenylation	gene_01313	0.0242308	0.0386951
	GO:0006526	11	1	arginine biosynthetic process	gene_00882	0.0242308	0.0386951
	GO:0006783	11	1	heme biosynthetic process	gene_01664	0.0242308	0.0386951
	GO:0032880	11	1	regulation of protein localization	gene_06384	0.0242308	0.0386951
	GO:0042307	11	1	positive regulation of protein import into nucleus	gene_01515	0.0242308	0.0386951
	GO:0000079	10	2	regulation of cyclin-dependent protein serine/threonine kinase activity	gene_06384;gene_10294	0.00119658	0.00490302
	GO:0000011	10	1	vacuole inheritance	gene_01515	0.0201194	0.0329706
	GO:0006807	10	1	nitrogen compound metabolic process	gene_00882	0.0201194	0.0329706
	GO:0016584	10	1	nucleosome positioning	gene_10563	0.0201194	0.0329706
	GO:0034755	10	1	iron ion transmembrane transport	gene_01628	0.0201194	0.0329706
	GO:0000147	9	1	actin cortical patch assembly	gene_08577	0.0163349	0.0276368
	GO:0006687	9	1	glycosphingolipid metabolic process	gene_10215	0.0163349	0.0276368
	GO:0008610	9	1	lipid biosynthetic process	gene_01966	0.0163349	0.0276368
	GO:0010971	9	1	positive regulation of G2/M transition of mitotic cell cycle	gene_10294	0.0163349	0.0276368
	GO:0019878	9	1	lysine biosynthetic process via aminoadipic acid	gene_06501	0.0163349	0.0276368
	GO:0034221	9	1	fungal-type cell wall chitin biosynthetic process	gene_01282	0.0163349	0.0276368
	GO:0034976	9	1	response to endoplasmic reticulum stress	gene_02996	0.0163349	0.0276368
	GO:0043065	9	1	positive regulation of apoptotic process	gene_01584	0.0163349	0.0276368
	GO:0043547	9	1	positive regulation of GTPase activity	gene_07387	0.0163349	0.0276368
	GO:0051056	8	3	regulation of small GTPase mediated signal transduction	gene_03393;gene_01978;gene_03354	1.61762e-05	0.000146758
	GO:0042766	8	2	nucleosome mobilization	gene_10563;gene_07383	0.000577308	0.00254503
	GO:0000032	8	1	cell wall mannoprotein biosynthetic process	gene_03624	0.0128942	0.0231282
	GO:0000086	8	1	G2/M transition of mitotic cell cycle	gene_10294	0.0128942	0.0231282
	GO:0006869	8	1	lipid transport	gene_01079	0.0128942	0.0231282
	GO:0006972	8	1	hyperosmotic response	gene_06081	0.0128942	0.0231282
	GO:0006995	8	1	cellular response to nitrogen starvation	gene_10398	0.0128942	0.0231282
	GO:0009410	8	1	response to xenobiotic stimulus	gene_10080	0.0128942	0.0231282
	GO:0009615	8	1	response to virus	gene_05879	0.0128942	0.0231282
	GO:0010629	8	1	negative regulation of gene expression	gene_01515	0.0128942	0.0231282
	GO:0010811	8	1	positive regulation of cell-substrate adhesion	gene_05709	0.0128942	0.0231282
	GO:0036246	8	1	phytochelatin 2 import into vacuole	gene_01015	0.0128942	0.0231282
	GO:0071996	8	1	glutathione transmembrane import into vacuole	gene_01015	0.0128942	0.0231282
	GO:0097271	8	1	protein localization to bud neck	gene_01282	0.0128942	0.0231282
	GO:1990573	8	1	potassium ion import across plasma membrane	gene_04939	0.0128942	0.0231282
	GO:0000282	7	2	cellular bud site selection	gene_03393;gene_06081	0.000366884	0.00228407
	GO:0030007	7	2	cellular potassium ion homeostasis	gene_07274;gene_04939	0.000366884	0.00228407
	GO:0000082	7	1	G1/S transition of mitotic cell cycle	gene_10294	0.00981494	0.0187895
	GO:0006537	7	1	glutamate biosynthetic process	gene_05128	0.00981494	0.0187895
	GO:0006813	7	1	potassium ion transport	gene_04939	0.00981494	0.0187895
	GO:0006826	7	1	iron ion transport	gene_01628	0.00981494	0.0187895
	GO:0006952	7	1	defense response	gene_05879	0.00981494	0.0187895
	GO:0007121	7	1	bipolar cellular bud site selection	gene_03393	0.00981494	0.0187895
	GO:1900182	7	1	positive regulation of protein localization to nucleus	gene_10294	0.00981494	0.0187895
	GO:0000722	6	1	telomere maintenance via recombination	gene_10563	0.0071155	0.0141857
	GO:0000725	6	1	recombinational repair	gene_09030	0.0071155	0.0141857
	GO:0000729	6	1	DNA double-strand break processing	gene_02224	0.0071155	0.0141857
	GO:0001676	6	1	long-chain fatty acid metabolic process	gene_01079	0.0071155	0.0141857
	GO:0006505	6	1	GPI anchor metabolic process	gene_04896	0.0071155	0.0141857
	GO:0006535	6	1	cysteine biosynthetic process from serine	gene_08801	0.0071155	0.0141857
	GO:0006828	6	1	manganese ion transport	gene_01628	0.0071155	0.0141857
	GO:0007009	6	1	plasma membrane organization	gene_06718	0.0071155	0.0141857
	GO:0007120	6	1	axial cellular bud site selection	gene_03393	0.0071155	0.0141857
	GO:0008283	6	1	cell proliferation	gene_01584	0.0071155	0.0141857
	GO:0016477	6	1	cell migration	gene_01515	0.0071155	0.0141857
	GO:0030026	6	1	cellular manganese ion homeostasis	gene_01628	0.0071155	0.0141857
	GO:0030422	6	1	production of siRNA involved in RNA interference	gene_05879	0.0071155	0.0141857
	GO:0031106	6	1	septin ring organization	gene_01515	0.0071155	0.0141857
	GO:0044406	6	1	adhesion of symbiont to host	gene_00749	0.0071155	0.0141857
	GO:0046513	6	1	ceramide biosynthetic process	gene_06718	0.0071155	0.0141857
	GO:0070086	6	1	ubiquitin-dependent endocytosis	gene_04387	0.0071155	0.0141857
	GO:0071421	6	1	manganese ion transmembrane transport	gene_01628	0.0071155	0.0141857
	GO:0071902	6	1	positive regulation of protein serine/threonine kinase activity	gene_07387	0.0071155	0.0141857
	GO:0000023	5	1	maltose metabolic process	gene_05709	0.00481472	0.0111218
	GO:0000025	5	1	maltose catabolic process	gene_05709	0.00481472	0.0111218
	GO:0000162	5	1	tryptophan biosynthetic process	gene_05969	0.00481472	0.0111218
	GO:0000187	5	1	activation of MAPK activity	gene_07387	0.00481472	0.0111218
	GO:0001324	5	1	age-dependent response to oxidative stress involved in chronological cell aging	gene_10398	0.00481472	0.0111218
	GO:0006688	5	1	glycosphingolipid biosynthetic process	gene_10215	0.00481472	0.0111218
	GO:0006782	5	1	protoporphyrinogen IX biosynthetic process	gene_01664	0.00481472	0.0111218
	GO:0007096	5	1	regulation of exit from mitosis	gene_01515	0.00481472	0.0111218
	GO:0007232	5	1	osmosensory signaling pathway via Sho1 osmosensor	gene_06081	0.00481472	0.0111218
	GO:0007265	5	1	Ras protein signal transduction	gene_01839	0.00481472	0.0111218
	GO:0009098	5	1	leucine biosynthetic process	gene_00832	0.00481472	0.0111218
	GO:0030866	5	1	cortical actin cytoskeleton organization	gene_07387	0.00481472	0.0111218
	GO:0031578	5	1	mitotic spindle orientation checkpoint	gene_03393	0.00481472	0.0111218
	GO:0036091	5	1	positive regulation of transcription from RNA polymerase II promoter in response to oxidative stress	gene_00082	0.00481472	0.0111218
	GO:0043405	5	1	regulation of MAP kinase activity	gene_00805	0.00481472	0.0111218
	GO:0043618	5	1	regulation of transcription from RNA polymerase II promoter in response to stress	gene_10563	0.00481472	0.0111218
	GO:0046827	5	1	positive regulation of protein export from nucleus	gene_01071	0.00481472	0.0111218
	GO:0048026	5	1	positive regulation of mRNA splicing, via spliceosome	gene_01071	0.00481472	0.0111218
	GO:0052155	5	1	modulation by symbiont of host cell-mediated immune response	gene_00749	0.00481472	0.0111218
	GO:0061404	5	1	positive regulation of transcription from RNA polymerase II promoter in response to increased salt	gene_00082	0.00481472	0.0111218
	GO:0070919	5	1	production of siRNA involved in chromatin silencing by small RNA	gene_05879	0.00481472	0.0111218
	GO:0090053	5	1	positive regulation of chromatin silencing at centromere	gene_10563	0.00481472	0.0111218
	GO:1900189	5	1	positive regulation of cell adhesion involved in single-species biofilm formation	gene_05709	0.00481472	0.0111218
	GO:0008615	4	2	pyridoxine biosynthetic process	gene_08802;gene_08801	4.40847e-05	0.000383292
	GO:0032874	4	2	positive regulation of stress-activated MAPK cascade	gene_10472;gene_03157	4.40847e-05	0.000383292
	GO:0000038	4	1	very long-chain fatty acid metabolic process	gene_01079	0.00293219	0.00777775
	GO:0001174	4	1	transcriptional start site selection at RNA polymerase II promoter	gene_07383	0.00293219	0.00777775
	GO:0006101	4	1	citrate metabolic process	gene_03208	0.00293219	0.00777775
	GO:0006481	4	1	C-terminal protein methylation	gene_06685	0.00293219	0.00777775
	GO:0006536	4	1	glutamate metabolic process	gene_06501	0.00293219	0.00777775
	GO:0006675	4	1	mannosyl-inositol phosphorylceramide metabolic process	gene_10215	0.00293219	0.00777775
	GO:0006825	4	1	copper ion transport	gene_08598	0.00293219	0.00777775
	GO:0006875	4	1	cellular metal ion homeostasis	gene_06384	0.00293219	0.00777775
	GO:0007188	4	1	adenylate cyclase-modulating G protein-coupled receptor signaling pathway	gene_07387	0.00293219	0.00777775
	GO:0007234	4	1	osmosensory signaling via phosphorelay pathway	gene_10472	0.00293219	0.00777775
	GO:0009074	4	1	aromatic amino acid family catabolic process	gene_07382	0.00293219	0.00777775
	GO:0009814	4	1	defense response, incompatible interaction	gene_04412	0.00293219	0.00777775
	GO:0015691	4	1	cadmium ion transport	gene_08598	0.00293219	0.00777775
	GO:0016050	4	1	vesicle organization	gene_10510	0.00293219	0.00777775
	GO:0019933	4	1	cAMP-mediated signaling	gene_07387	0.00293219	0.00777775
	GO:0030011	4	1	maintenance of cell polarity	gene_03393	0.00293219	0.00777775
	GO:0030838	4	1	positive regulation of actin filament polymerization	gene_07387	0.00293219	0.00777775
	GO:0034644	4	1	cellular response to UV	gene_09030	0.00293219	0.00777775
	GO:0035376	4	1	sterol import	gene_01515	0.00293219	0.00777775
	GO:0045455	4	1	ecdysteroid metabolic process	gene_02996	0.00293219	0.00777775
	GO:0046578	4	1	regulation of Ras protein signal transduction	gene_07387	0.00293219	0.00777775
	GO:0051999	4	1	mannosyl-inositol phosphorylceramide biosynthetic process	gene_10215	0.00293219	0.00777775
	GO:0061406	4	1	positive regulation of transcription from RNA polymerase II promoter in response to glucose starvation	gene_10398	0.00293219	0.00777775
	GO:0080040	4	1	positive regulation of cellular response to phosphate starvation	gene_10563	0.00293219	0.00777775
	GO:0098783	4	1	correction of merotelic kinetochore attachment, mitotic	gene_10294	0.00293219	0.00777775
	GO:1900378	4	1	positive regulation of secondary metabolite biosynthetic process	gene_10080	0.00293219	0.00777775
	GO:1990961	4	1	drug transmembrane export	gene_06118	0.00293219	0.00777775
	GO:0042823	3	2	pyridoxal phosphate biosynthetic process	gene_08802;gene_08801	1.12072e-05	0.000103173
	GO:0000050	3	1	urea cycle	gene_00882	0.00148814	0.00490302
	GO:0006044	3	1	N-acetylglucosamine metabolic process	gene_04806	0.00148814	0.00490302
	GO:0006673	3	1	inositol phosphoceramide metabolic process	gene_00104	0.00148814	0.00490302
	GO:0006909	3	1	phagocytosis	gene_07387	0.00148814	0.00490302
	GO:0006935	3	1	chemotaxis	gene_07387	0.00148814	0.00490302
	GO:0007323	3	1	peptide pheromone maturation	gene_06685	0.00148814	0.00490302
	GO:0009298	3	1	GDP-mannose biosynthetic process	gene_03624	0.00148814	0.00490302
	GO:0009751	3	1	response to salicylic acid	gene_05879	0.00148814	0.00490302
	GO:0010508	3	1	positive regulation of autophagy	gene_10398	0.00148814	0.00490302
	GO:0010737	3	1	protein kinase A signaling	gene_01839	0.00148814	0.00490302
	GO:0033014	3	1	tetrapyrrole biosynthetic process	gene_01664	0.00148814	0.00490302
	GO:0035948	3	1	positive regulation of gluconeogenesis by positive regulation of transcription from RNA polymerase II promoter	gene_07339	0.00148814	0.00490302
	GO:0036267	3	1	invasive filamentous growth	gene_03393	0.00148814	0.00490302
	GO:0036376	3	1	sodium ion export across plasma membrane	gene_07274	0.00148814	0.00490302
	GO:0038203	3	1	TORC2 signaling	gene_06938	0.00148814	0.00490302
	GO:0042138	3	1	meiotic DNA double-strand break formation	gene_02224	0.00148814	0.00490302
	GO:0043408	3	1	regulation of MAPK cascade	gene_01515	0.00148814	0.00490302
	GO:0051447	3	1	negative regulation of meiotic cell cycle	gene_10294	0.00148814	0.00490302
	GO:0061414	3	1	positive regulation of transcription from RNA polymerase II promoter by a nonfermentable carbon source	gene_07339	0.00148814	0.00490302
	GO:0070879	3	1	fungal-type cell wall beta-glucan metabolic process	gene_02910	0.00148814	0.00490302
	GO:0090282	3	1	positive regulation of transcription involved in G2/M transition of mitotic cell cycle	gene_02507	0.00148814	0.00490302
	GO:1990872	3	1	negative regulation of sterol import by negative regulation of transcription from RNA polymerase II promoter	gene_01515	0.00148814	0.00490302
	GO:0000012	2	1	single strand break repair	gene_05541	0.000503517	0.00228407
	GO:0005985	2	1	sucrose metabolic process	gene_05709	0.000503517	0.00228407
	GO:0006014	2	1	D-ribose metabolic process	gene_00624	0.000503517	0.00228407
	GO:0006085	2	1	acetyl-CoA biosynthetic process	gene_03208	0.000503517	0.00228407
	GO:0009652	2	1	thigmotropism	gene_03393	0.000503517	0.00228407
	GO:0009816	2	1	defense response to bacterium, incompatible interaction	gene_04412	0.000503517	0.00228407
	GO:0010025	2	1	wax biosynthetic process	gene_05879	0.000503517	0.00228407
	GO:0015964	2	1	diadenosine triphosphate catabolic process	gene_08898	0.000503517	0.00228407
	GO:0016242	2	1	negative regulation of macroautophagy	gene_06384	0.000503517	0.00228407
	GO:0019449	2	1	L-cysteine catabolic process to hypotaurine	gene_00016	0.000503517	0.00228407
	GO:0019452	2	1	L-cysteine catabolic process to taurine	gene_00016	0.000503517	0.00228407
	GO:0019676	2	1	ammonia assimilation cycle	gene_05128	0.000503517	0.00228407
	GO:0031494	2	1	regulation of mating type switching	gene_02507	0.000503517	0.00228407
	GO:0032958	2	1	inositol phosphate biosynthetic process	gene_02196	0.000503517	0.00228407
	GO:0034225	2	1	regulation of transcription from RNA polymerase II promoter in response to zinc ion starvation	gene_05023	0.000503517	0.00228407
	GO:0036252	2	1	positive regulation of transcription from RNA polymerase II promoter in response to menadione	gene_00082	0.000503517	0.00228407
	GO:0042391	2	1	regulation of membrane potential	gene_04939	0.000503517	0.00228407
	GO:0042412	2	1	taurine biosynthetic process	gene_00016	0.000503517	0.00228407
	GO:0043326	2	1	chemotaxis to folate	gene_07387	0.000503517	0.00228407
	GO:0044539	2	1	long-chain fatty acid import	gene_01079	0.000503517	0.00228407
	GO:0045046	2	1	protein import into peroxisome membrane	gene_01492	0.000503517	0.00228407
	GO:0046579	2	1	positive regulation of Ras protein signal transduction	gene_07387	0.000503517	0.00228407
	GO:0050896	2	1	response to stimulus	gene_07387	0.000503517	0.00228407
	GO:0051457	2	1	maintenance of protein location in nucleus	gene_01071	0.000503517	0.00228407
	GO:0060148	2	1	positive regulation of posttranscriptional gene silencing	gene_05879	0.000503517	0.00228407
	GO:0061351	2	1	neural precursor cell proliferation	gene_01584	0.000503517	0.00228407
	GO:0070791	2	1	cleistothecium development	gene_05969	0.000503517	0.00228407
	GO:0070898	2	1	RNA polymerase III preinitiation complex assembly	gene_01618	0.000503517	0.00228407
	GO:0071257	2	1	cellular response to electrical stimulus	gene_03393	0.000503517	0.00228407
	GO:0072511	2	1	divalent inorganic cation transport	gene_01628	0.000503517	0.00228407
	GO:0097552	2	1	mitochondrial double-strand break repair via homologous recombination	gene_02224	0.000503517	0.00228407
	GO:1900396	2	1	positive regulation of kojic acid biosynthetic process	gene_10080	0.000503517	0.00228407
	GO:1901522	2	1	positive regulation of transcription from RNA polymerase II promoter involved in cellular response to chemical stimulus	gene_02178	0.000503517	0.00228407
	GO:1990570	2	1	GDP-mannose transmembrane transport	gene_00814	0.000503517	0.00228407
	GO:1990918	2	1	double-strand break repair involved in meiotic recombination	gene_02224	0.000503517	0.00228407
	GO:2001317	2	1	kojic acid biosynthetic process	gene_10080	0.000503517	0.00228407
	GO:0001111	1	1	promoter clearance from RNA polymerase II promoter	gene_07383	0	0
	GO:0001195	1	1	maintenance of transcriptional fidelity during DNA-templated transcription elongation from RNA polymerase III promoter	gene_01618	0	0
	GO:0001197	1	1	positive regulation of mating-type specific transcription from RNA polymerase II promoter	gene_02507	0	0
	GO:0001198	1	1	negative regulation of mating-type specific transcription from RNA polymerase II promoter	gene_02507	0	0
	GO:0002943	1	1	tRNA dihydrouridine synthesis	gene_06466	0	0
	GO:0006880	1	1	intracellular sequestering of iron ion	gene_01628	0	0
	GO:0008016	1	1	regulation of heart contraction	gene_01584	0	0
	GO:0010200	1	1	response to chitin	gene_04412	0	0
	GO:0010607	1	1	negative regulation of cytoplasmic mRNA processing body assembly	gene_01839	0	0
	GO:0015673	1	1	silver ion transport	gene_08598	0	0
	GO:0019614	1	1	catechol-containing compound catabolic process	gene_05880	0	0
	GO:0030004	1	1	cellular monovalent inorganic cation homeostasis	gene_07274	0	0
	GO:0030328	1	1	prenylcysteine catabolic process	gene_00662	0	0
	GO:0031141	1	1	induction of conjugation upon carbon starvation	gene_06924	0	0
	GO:0031152	1	1	aggregation involved in sorocarp development	gene_07387	0	0
	GO:0035959	1	1	positive regulation of glyoxylate cycle by positive regulation of transcription from RNA polymerase II promoter	gene_07339	0	0
	GO:0036001	1	1	'de novo' pyridoxal 5'-phosphate biosynthetic process	gene_08802	0	0
	GO:0042769	1	1	DNA damage response, detection of DNA damage	gene_02224	0	0
	GO:0042819	1	1	vitamin B6 biosynthetic process	gene_08802	0	0
	GO:0043327	1	1	chemotaxis to cAMP	gene_07387	0	0
	GO:0044772	1	1	mitotic cell cycle phase transition	gene_10294	0	0
	GO:0045936	1	1	negative regulation of phosphate metabolic process	gene_06384	0	0
	GO:0046836	1	1	glycolipid transport	gene_01270	0	0
	GO:0048821	1	1	erythrocyte development	gene_01584	0	0
	GO:0050849	1	1	negative regulation of calcium-mediated signaling	gene_06384	0	0
	GO:0051039	1	1	positive regulation of transcription involved in meiotic cell cycle	gene_10398	0	0
	GO:0051983	1	1	regulation of chromosome segregation	gene_10563	0	0
	GO:0061393	1	1	positive regulation of transcription from RNA polymerase II promoter in response to osmotic stress	gene_01158	0	0
	GO:0070322	1	1	negative regulation of translation in response to nitrogen starvation	gene_10294	0	0
	GO:0070994	1	1	detection of oxidative stress	gene_03157	0	0
	GO:0071998	1	1	ascospore release from ascus	gene_04834	0	0
	GO:0072422	1	1	signal transduction involved in DNA damage checkpoint	gene_02224	0	0
	GO:0075297	1	1	negative regulation of ascospore formation	gene_10294	0	0
	GO:0090540	1	1	bacterial cellulose biosynthetic process	gene_04474	0	0
	GO:0120009	1	1	intermembrane lipid transfer	gene_01270	0	0
	GO:1900465	1	1	negative regulation of arginine catabolic process by negative regulation of transcription from RNA polymerase II promoter	gene_02507	0	0
	GO:1900466	1	1	positive regulation of arginine biosynthetic process by positive regulation of transcription from RNA polymerase II promoter	gene_02507	0	0
	GO:1901992	1	1	positive regulation of mitotic cell cycle phase transition	gene_10398	0	0
	GO:1902610	1	1	response to N-phenylthiourea	gene_07387	0	0
	GO:1903452	1	1	positive regulation of G1 to G0 transition	gene_10398	0	0
	GO:1903665	1	1	negative regulation of asexual reproduction	gene_07387	0	0
	GO:1905168	1	1	positive regulation of double-strand break repair via homologous recombination	gene_10294	0	0
	GO:1905301	1	1	regulation of macropinocytosis	gene_07387	0	0
	GO:1990898	1	1	meiotic DNA double-strand break clipping	gene_02224	0	0
	GO:2000766	1	1	negative regulation of cytoplasmic translation	gene_01839	0	0
	GO:2001295	1	1	malonyl-CoA biosynthetic process	gene_09965	0	0
Ceelular Component	GO:0005575	3016	67	cellular_component	gene_00662;gene_08833;gene_09192;gene_09390;gene_01569;gene_02074;gene_08922;gene_02300;gene_04039;gene_06979;gene_00155;gene_02196;gene_07146;gene_05464;gene_05465;gene_00624;gene_09014;gene_04447;gene_05326;gene_01496;gene_01845;gene_01568;gene_07969;gene_05969;gene_02477;gene_00805;gene_08577;gene_02773;gene_00458;gene_03085;gene_04559;gene_09275;gene_09030;gene_03282;gene_02499;gene_08815;gen…	0.519688	0.535786
	GO:0005634	1441	45	nucleus	gene_08180;gene_08166;gene_08898;gene_02178;gene_05124;gene_05128;gene_02342;gene_00082;gene_03208;gene_09216;gene_07312;gene_01494;gene_07339;gene_06384;gene_01158;gene_07383;gene_00977;gene_06924;gene_01598;gene_01839;gene_05023;gene_01071;gene_01313;gene_05879;gene_03624;gene_10398;gene_05709;gene_06345;gene_03086;gene_05392;gene_01515;gene_06502;gene_00023;gene_04834;gene_09561;gene_06501;gen…	0.00676888	0.0141857
	GO:0005737	982	27	cytoplasm	gene_04806;gene_00882;gene_05128;gene_10403;gene_02342;gene_00016;gene_08802;gene_00082;gene_07339;gene_06384;gene_01158;gene_01282;gene_01071;gene_09965;gene_01313;gene_03624;gene_10398;gene_01515;gene_06501;gene_10472;gene_02248;gene_09538;gene_07387;gene_10294;gene_03157;gene_01584;gene_01270	0.109595	0.13068
	GO:0016021	851	20	integral component of membrane	gene_01921;gene_08598;gene_01015;gene_06685;gene_02271;gene_00814;gene_07274;gene_06118;gene_01282;gene_10402;gene_06081;gene_10565;gene_04412;gene_07178;gene_01432;gene_07901;gene_01079;gene_04939;gene_03159;gene_01628	0.36027	0.379055
	GO:0005829	780	17	cytosol	gene_08898;gene_04387;gene_05128;gene_00082;gene_03208;gene_01839;gene_01071;gene_09965;gene_00832;gene_03624;gene_00023;gene_08801;gene_06501;gene_10472;gene_06938;gene_07387;gene_02507	0.491922	0.508157
	GO:0016020	512	16	membrane	gene_00976;gene_01015;gene_03016;gene_02350;gene_09639;gene_01282;gene_06081;gene_10565;gene_01432;gene_08028;gene_01079;gene_04939;gene_00953;gene_07387;gene_01628;gene_01584	0.0684034	0.0875676
	GO:0005739	511	5	mitochondrion	gene_01664;gene_02350;gene_10414;gene_04661;gene_06501	0.976805	0.976805
	GO:0005886	417	11	plasma membrane	gene_08598;gene_07274;gene_01282;gene_06081;gene_04412;gene_04939;gene_04474;gene_02248;gene_09538;gene_07387;gene_01584	0.229002	0.249748
	GO:0005783	303	3	endoplasmic reticulum	gene_01282;gene_01079;gene_06718	0.914799	0.916262
	GO:0005576	227	5	extracellular region	gene_02910;gene_03812;gene_02350;gene_06081;gene_04412	0.403295	0.420771
	GO:0005794	172	3	Golgi apparatus	gene_00814;gene_00104;gene_01628	0.544572	0.558856
	GO:0005730	145	3	nucleolus	gene_06502;gene_05541;gene_10294	0.412494	0.428939
	GO:0000790	142	7	nuclear chromatin	gene_10563;gene_00082;gene_01494;gene_01839;gene_10294;gene_02507;gene_01618	0.0146387	0.0261078
	GO:0005789	135	1	endoplasmic reticulum membrane	gene_06685	0.812212	0.818751
	GO:0000324	128	4	fungal-type vacuole	gene_01119;gene_01015;gene_01515;gene_01628	0.16144	0.183415
	GO:0000329	119	3	fungal-type vacuole membrane	gene_09965;gene_01079;gene_01628	0.279549	0.299142
	GO:0032153	111	1	cell division site	gene_01071	0.717787	0.728258
	GO:0005759	88	1	mitochondrial matrix	gene_01664	0.593043	0.60562
	GO:0005887	71	2	integral component of plasma membrane	gene_06081;gene_04939	0.214296	0.23535
	GO:0005622	67	2	intracellular	gene_01978;gene_03354	0.191056	0.213955
	GO:0005773	62	3	vacuole	gene_01119;gene_02248;gene_01628	0.0504222	0.0689177
	GO:0009986	62	3	cell surface	gene_00749;gene_02910;gene_06081	0.0504222	0.0689177
	GO:0005654	62	1	nucleoplasm	gene_05541	0.408485	0.425477
	GO:0005777	61	1	peroxisome	gene_01079	0.400567	0.418622
	GO:0071944	59	3	cell periphery	gene_02350;gene_01079;gene_04939	0.043294	0.061093
	GO:0031410	55	2	cytoplasmic vesicle	gene_10406;gene_01282	0.126194	0.147384
	GO:0009277	53	5	fungal-type cell wall	gene_00749;gene_02910;gene_02350;gene_03393;gene_03020	0.00113991	0.00488756
	GO:0000139	52	2	Golgi membrane	gene_00814;gene_01628	0.111457	0.132646
	GO:0005840	51	1	ribosome	gene_02350	0.319061	0.337956
	GO:0005741	49	1	mitochondrial outer membrane	gene_03084	0.302385	0.321926
	GO:0044732	48	2	mitotic spindle pole body	gene_01071;gene_10294	0.0929387	0.112687
	GO:0034399	46	1	nuclear periphery	gene_10294	0.277253	0.297193
	GO:0005935	45	2	cellular bud neck	gene_03393;gene_01282	0.0799799	0.0991434
	GO:0005774	43	1	vacuolar membrane	gene_01628	0.252074	0.271597
	GO:0030176	41	1	integral component of endoplasmic reticulum membrane	gene_06718	0.235318	0.255302
	GO:0035861	41	1	site of double-strand break	gene_02224	0.235318	0.255302
	GO:0005615	38	1	extracellular space	gene_01119	0.210328	0.231398
	GO:0005761	36	1	mitochondrial ribosome	gene_10293	0.193827	0.2159
	GO:0009536	36	1	plastid	gene_02248	0.193827	0.2159
	GO:0005762	35	2	mitochondrial large ribosomal subunit	gene_06501;gene_10293	0.0433155	0.061093
	GO:0005938	35	2	cell cortex	gene_02357;gene_01584	0.0433155	0.061093
	GO:0009507	35	2	chloroplast	gene_04661;gene_00977	0.0433155	0.061093
	GO:0030687	35	1	preribosome, large subunit precursor	gene_06502	0.185642	0.208265
	GO:0031225	34	2	anchored component of membrane	gene_00749;gene_02350	0.0402482	0.0575237
	GO:0043332	34	1	mating projection tip	gene_01282	0.177509	0.200579
	GO:0000131	32	2	incipient cellular bud site	gene_03393;gene_01282	0.0344592	0.0505187
	GO:0000784	32	1	nuclear chromosome, telomeric region	gene_02224	0.161426	0.183415
	GO:0005628	29	1	prospore membrane	gene_01282	0.137869	0.15836
	GO:0005811	29	1	lipid droplet	gene_01079	0.137869	0.15836
	GO:0005618	28	1	cell wall	gene_02350	0.130199	0.151215
	GO:0005813	27	1	centrosome	gene_10294	0.122634	0.143494
	GO:0000932	25	1	P-body	gene_01839	0.107855	0.12885
	GO:0062040	23	1	fungal biofilm matrix	gene_10510	0.0936059	0.112687
	GO:0072686	23	1	mitotic spindle	gene_10294	0.0936059	0.112687
	GO:0005763	22	1	mitochondrial small ribosomal subunit	gene_10413	0.0867052	0.105804
	GO:0000328	21	1	fungal-type vacuole lumen	gene_01119	0.0799679	0.0991434
	GO:0046658	21	1	anchored component of plasma membrane	gene_00749	0.0799679	0.0991434
	GO:0005933	20	1	cellular bud	gene_01515	0.073405	0.0930193
	GO:0000151	19	1	ubiquitin ligase complex	gene_02342	0.067028	0.0859826
	GO:0005694	19	1	chromosome	gene_01618	0.067028	0.0859826
	GO:0016592	19	1	mediator complex	gene_07383	0.067028	0.0859826
	GO:0030173	19	1	integral component of Golgi membrane	gene_00104	0.067028	0.0859826
	GO:0030428	18	1	cell septum	gene_01282	0.0608488	0.0798561
	GO:1990023	18	1	mitotic spindle midzone	gene_10294	0.0608488	0.0798561
	GO:0031011	16	2	Ino80 complex	gene_10563;gene_07383	0.00505547	0.0114664
	GO:0005669	16	1	transcription factor TFIID complex	gene_07383	0.0491337	0.0677482
	GO:0000407	15	1	phagophore assembly site	gene_01493	0.0436239	0.061093
	GO:0005844	14	1	polysome	gene_09538	0.0383642	0.0549565
	GO:0030427	13	1	site of polarized growth	gene_06081	0.0333688	0.0492662
	GO:0005779	12	1	integral component of peroxisomal membrane	gene_01492	0.0286526	0.043962
	GO:0030659	10	1	cytoplasmic vesicle membrane	gene_01282	0.0201194	0.0329706
	GO:0001411	9	2	hyphal tip	gene_03393;gene_01978	0.000851659	0.00367682
	GO:0005724	9	1	nuclear telomeric heterochromatin	gene_10294	0.0163349	0.0276368
	GO:0045335	9	1	phagocytic vesicle	gene_07387	0.0163349	0.0276368
	GO:0000307	8	2	cyclin-dependent protein kinase holoenzyme complex	gene_06384;gene_10294	0.000577308	0.00254503
	GO:0009570	8	1	chloroplast stroma	gene_04661	0.0128942	0.0231282
	GO:0031932	8	1	TORC2 complex	gene_06938	0.0128942	0.0231282
	GO:0016514	7	1	SWI/SNF complex	gene_07383	0.00981494	0.0187895
	GO:0045009	6	1	chitosome	gene_01282	0.0071155	0.0141857
	GO:0072687	6	1	meiotic spindle	gene_10294	0.0071155	0.0141857
	GO:1990421	6	1	subtelomeric heterochromatin	gene_02224	0.0071155	0.0141857
	GO:0005637	5	1	nuclear inner membrane	gene_06685	0.00481472	0.0111218
	GO:0005834	5	1	heterotrimeric G-protein complex	gene_07387	0.00481472	0.0111218
	GO:0032588	5	1	trans-Golgi network membrane	gene_10215	0.00481472	0.0111218
	GO:0033106	5	1	cis-Golgi network membrane	gene_10215	0.00481472	0.0111218
	GO:0009898	4	1	cytoplasmic side of plasma membrane	gene_04387	0.00293219	0.00777775
	GO:0031380	4	1	nuclear RNA-directed RNA polymerase complex	gene_05879	0.00293219	0.00777775
	GO:0031982	4	1	vesicle	gene_07387	0.00293219	0.00777775
	GO:0032592	4	1	integral component of mitochondrial membrane	gene_03084	0.00293219	0.00777775
	GO:0005674	3	1	transcription factor TFIIF complex	gene_07383	0.00148814	0.00490302
	GO:0005901	3	1	caveola	gene_02248	0.00148814	0.00490302
	GO:0005952	3	1	cAMP-dependent protein kinase complex	gene_01839	0.00148814	0.00490302
	GO:0030870	3	1	Mre11 complex	gene_02224	0.00148814	0.00490302
	GO:0033100	3	1	NuA3 histone acetyltransferase complex	gene_07383	0.00148814	0.00490302
	GO:0090575	3	1	RNA polymerase II transcription factor complex	gene_00082	0.00148814	0.00490302
	GO:1990468	3	1	NuA3b histone acetyltransferase complex	gene_07383	0.00148814	0.00490302
	GO:1903600	2	2	glutaminase complex	gene_08802;gene_08801	0	0
	GO:1990467	2	1	NuA3a histone acetyltransferase complex	gene_07383	0.000503517	0.00228407
	GO:0005951	1	1	carbamoyl-phosphate synthase complex	gene_00882	0	0
	GO:0009365	1	1	protein histidine kinase complex	gene_03157	0	0
	GO:0031235	1	1	intrinsic component of the cytoplasmic side of the plasma membrane	gene_01079	0	0
	GO:0070916	1	1	inositol phosphoceramide synthase complex	gene_00104	0	0
	GO:0097221	1	1	M/G1 phase-specific MADS box-forkhead transcription factor complex	gene_01494	0	0
	GO:1990860	1	1	Pho85-Pho80 CDK-cyclin complex	gene_06384	0	0
Molecular Function	GO:0003674	2499	52	molecular_function	gene_04806;gene_08833;gene_09192;gene_09390;gene_04387;gene_02300;gene_06979;gene_00155;gene_07146;gene_05464;gene_02271;gene_05465;gene_09639;gene_05326;gene_01568;gene_02477;gene_00805;gene_08577;gene_00458;gene_04559;gene_02357;gene_03282;gene_07178;gene_08815;gene_04329;gene_00187;gene_06502;gene_04538;gene_07901;gene_05543;gene_08960;gene_07340;gene_05363;gene_03020;gene_08278;gene_01966;gen…	0.725156	0.734488
	GO:0005524	668	18	ATP binding	gene_10563;gene_01921;gene_00882;gene_01015;gene_03208;gene_06118;gene_01845;gene_01839;gene_10402;gene_01071;gene_09965;gene_01313;gene_09030;gene_10398;gene_01515;gene_09538;gene_03157;gene_01584	0.170909	0.19347
	GO:0008270	565	19	zinc ion binding	gene_02178;gene_05124;gene_09216;gene_07312;gene_09014;gene_07339;gene_03085;gene_03624;gene_05709;gene_06345;gene_03086;gene_05392;gene_09561;gene_10080;gene_06674;gene_07382;gene_06120;gene_10301;gene_09537	0.0286233	0.043962
	GO:0046872	389	16	metal ion binding	gene_08180;gene_08166;gene_08598;gene_02342;gene_03208;gene_07339;gene_04661;gene_05023;gene_09965;gene_04412;gene_01313;gene_00832;gene_03624;gene_06501;gene_04780;gene_05541	0.00651631	0.0141857
	GO:0000166	384	9	nucleotide binding	gene_01921;gene_08598;gene_06118;gene_01845;gene_01839;gene_10402;gene_10398;gene_01515;gene_01584	0.363444	0.381739
	GO:0003677	383	20	DNA binding	gene_08180;gene_08166;gene_10563;gene_02178;gene_08922;gene_07312;gene_07339;gene_01158;gene_01845;gene_09030;gene_05709;gene_06345;gene_03086;gene_04834;gene_09561;gene_04997;gene_10080;gene_05541;gene_02507;gene_01618	0.000132229	0.00108915
	GO:0005515	374	10	protein binding	gene_08180;gene_08166;gene_02224;gene_00082;gene_01071;gene_01313;gene_10472;gene_07387;gene_10294;gene_03157	0.22112	0.242419
	GO:0016491	362	5	oxidoreductase activity	gene_05128;gene_10403;gene_10414;gene_02499;gene_02996	0.830945	0.836289
	GO:0003824	314	5	catalytic activity	gene_10406;gene_04039;gene_01664;gene_01079;gene_05541	0.715561	0.727177
	GO:0000981	283	14	DNA-binding transcription factor activity, RNA polymerase II-specific	gene_08180;gene_08166;gene_02178;gene_05124;gene_09216;gene_01494;gene_07339;gene_05709;gene_06345;gene_03086;gene_09561;gene_10080;gene_07382;gene_02507	0.00174794	0.00561134
	GO:0016787	264	3	hydrolase activity	gene_01119;gene_09030;gene_05541	0.85084	0.854938
	GO:0003676	221	8	nucleic acid binding	gene_10563;gene_02342;gene_07312;gene_09014;gene_03085;gene_05541;gene_03592;gene_10301	0.0614423	0.0804663
	GO:0016740	215	7	transferase activity	gene_01664;gene_01282;gene_01839;gene_10398;gene_01515;gene_10215;gene_01584	0.11168	0.132659
	GO:0003723	182	3	RNA binding	gene_01313;gene_05879;gene_00023	0.589587	0.604061
	GO:0016887	153	5	ATPase activity	gene_10563;gene_01921;gene_01015;gene_10402;gene_09538	0.130629	0.151432
	GO:0004674	139	5	protein serine/threonine kinase activity	gene_01839;gene_01071;gene_10398;gene_01515;gene_01584	0.0931892	0.112687
	GO:0003735	134	3	structural constituent of ribosome	gene_10413;gene_06501;gene_10293	0.356129	0.375947
	GO:0017111	118	3	nucleoside-triphosphatase activity	gene_01921;gene_01845;gene_10402	0.274524	0.294772
	GO:0005506	116	1	iron ion binding	gene_00977	0.740255	0.747419
	GO:0004672	110	5	protein kinase activity	gene_01839;gene_10398;gene_01515;gene_10294;gene_01584	0.0374075	0.0544583
	GO:0020037	104	3	heme binding	gene_00977;gene_01078;gene_03157	0.206343	0.228621
	GO:0016301	98	4	kinase activity	gene_01839;gene_10398;gene_01515;gene_01584	0.0696249	0.0887682
	GO:0050660	95	4	flavin adenine dinucleotide binding	gene_10403;gene_10414;gene_02996;gene_06466	0.0626063	0.0818194
	GO:0022857	94	2	transmembrane transporter activity	gene_00814;gene_10565	0.354899	0.375281
	GO:0042626	77	3	ATPase activity, coupled to transmembrane movement of substances	gene_01921;gene_01015;gene_10402	0.094941	0.114075
	GO:0008233	77	1	peptidase activity	gene_01119	0.52038	0.535786
	GO:0005509	70	2	calcium ion binding	gene_00976;gene_01584	0.208427	0.230522
	GO:0004497	66	1	monooxygenase activity	gene_00977	0.439634	0.455648
	GO:0030170	65	2	pyridoxal phosphate binding	gene_01664;gene_00016	0.179692	0.202316
	GO:0003682	65	1	chromatin binding	gene_08922	0.431929	0.448404
	GO:0004252	64	3	serine-type endopeptidase activity	gene_01569;gene_02074;gene_01119	0.0555111	0.0737791
	GO:0043565	61	6	sequence-specific DNA binding	gene_01158;gene_01598;gene_04834;gene_04997;gene_02507;gene_01618	0.000406844	0.00228407
	GO:0003700	60	5	DNA-binding transcription factor activity	gene_01158;gene_01598;gene_04834;gene_04997;gene_10080	0.00218348	0.00686865
	GO:0016705	56	1	oxidoreductase activity, acting on paired donors, with incorporation or reduction of molecular oxygen	gene_00977	0.360284	0.379055
	GO:0000978	51	6	RNA polymerase II proximal promoter sequence-specific DNA binding	gene_00082;gene_01494;gene_07339;gene_06924;gene_05023;gene_02507	0.000130448	0.00108881
	GO:0016747	43	1	transferase activity, transferring acyl groups other than amino-acyl groups	gene_09275	0.252074	0.271597
	GO:0061630	42	1	ubiquitin protein ligase activity	gene_02342	0.24369	0.263927
	GO:0003697	41	1	single-stranded DNA binding	gene_05541	0.235318	0.255302
	GO:0031177	40	1	phosphopantetheine binding	gene_10406	0.226964	0.247957
	GO:0016757	39	2	transferase activity, transferring glycosyl groups	gene_01282;gene_00953	0.0567065	0.0752082
	GO:0008236	38	1	serine-type peptidase activity	gene_01119	0.210328	0.231398
	GO:0004806	33	2	triglyceride lipase activity	gene_02773;gene_08114	0.0372958	0.0544223
	GO:0005096	33	1	GTPase activator activity	gene_03393	0.169435	0.192149
	GO:0004842	32	2	ubiquitin-protein transferase activity	gene_04412;gene_10510	0.0344592	0.0505187
	GO:0005543	32	2	phospholipid binding	gene_04447;gene_01496	0.0344592	0.0505187
	GO:0004190	32	1	aspartic-type endopeptidase activity	gene_00749	0.161426	0.183415
	GO:0001228	28	5	DNA-binding transcription activator activity, RNA polymerase II-specific	gene_00082;gene_01494;gene_07339;gene_06924;gene_02507	2.98066e-05	0.000266556
	GO:0030674	25	1	protein binding, bridging	gene_01492	0.107855	0.12885
	GO:0019901	24	2	protein kinase binding	gene_06384;gene_10294	0.0160194	0.0276368
	GO:0016746	22	1	transferase activity, transferring acyl groups	gene_01664	0.0867052	0.105804
	GO:0016788	20	2	hydrolase activity, acting on ester bonds	gene_04896;gene_05880	0.00963484	0.0187895
	GO:0051539	20	2	4 iron, 4 sulfur cluster binding	gene_00832;gene_06501	0.00963484	0.0187895
	GO:0003688	20	1	DNA replication origin binding	gene_02507	0.073405	0.0930193
	GO:0046983	18	3	protein dimerization activity	gene_01158;gene_09406;gene_02507	0.000592602	0.00259419
	GO:0008289	18	1	lipid binding	gene_01584	0.0608488	0.0798561
	GO:0016627	18	1	oxidoreductase activity, acting on the CH-CH group of donors	gene_10414	0.0608488	0.0798561
	GO:0005085	17	2	guanyl-nucleotide exchange factor activity	gene_01978;gene_03354	0.00603826	0.0135969
	GO:0008134	17	2	transcription factor binding	gene_02507;gene_01618	0.00603826	0.0135969
	GO:0000030	17	1	mannosyltransferase activity	gene_10215	0.0548797	0.073251
	GO:0003678	17	1	DNA helicase activity	gene_09030	0.0548797	0.073251
	GO:0004523	17	1	RNA-DNA hybrid ribonuclease activity	gene_02342	0.0548797	0.073251
	GO:0004721	17	1	phosphoprotein phosphatase activity	gene_04661	0.0548797	0.073251
	GO:0016853	17	1	isomerase activity	gene_03624	0.0548797	0.073251
	GO:0001227	16	2	DNA-binding transcription repressor activity, RNA polymerase II-specific	gene_05023;gene_02507	0.00505547	0.0114664
	GO:0016758	16	2	transferase activity, transferring hexosyl groups	gene_01282;gene_04474	0.00505547	0.0114664
	GO:0004043	15	1	L-aminoadipate-semialdehyde dehydrogenase activity	gene_10406	0.0436239	0.061093
	GO:0008324	15	1	cation transmembrane transporter activity	gene_04939	0.0436239	0.061093
	GO:0016614	14	1	oxidoreductase activity, acting on CH-OH group of donors	gene_02996	0.0383642	0.0549565
	GO:0016620	13	1	oxidoreductase activity, acting on the aldehyde or oxo group of donors, NAD or NADP as acceptor	gene_02499	0.0333688	0.0492662
	GO:0016881	13	1	acid-amino acid ligase activity	gene_10510	0.0333688	0.0492662
	GO:0031369	13	1	translation initiation factor binding	gene_01839	0.0333688	0.0492662
	GO:0030145	12	2	manganese ion binding	gene_02224;gene_03812	0.00212205	0.00670912
	GO:0004338	12	1	glucan exo-1,3-beta-glucosidase activity	gene_02910	0.0286526	0.043962
	GO:0004518	12	1	nuclease activity	gene_02224	0.0286526	0.043962
	GO:0015297	12	1	antiporter activity	gene_00814	0.0286526	0.043962
	GO:0051213	12	1	dioxygenase activity	gene_07969	0.0286526	0.043962
	GO:0008238	11	2	exopeptidase activity	gene_01569;gene_02074	0.00161818	0.00522156
	GO:0008484	11	1	sulfuric ester hydrolase activity	gene_00695	0.0242308	0.0386951
	GO:0008559	10	2	xenobiotic transmembrane transporting ATPase activity	gene_01015;gene_06118	0.00119658	0.00490302
	GO:0003968	10	1	RNA-directed 5'-3' RNA polymerase activity	gene_05879	0.0201194	0.0329706
	GO:0005381	10	1	iron ion transmembrane transporter activity	gene_01628	0.0201194	0.0329706
	GO:0008047	10	1	enzyme activator activity	gene_07387	0.0201194	0.0329706
	GO:0030983	10	1	mismatched DNA binding	gene_05541	0.0201194	0.0329706
	GO:0008240	9	2	tripeptidyl-peptidase activity	gene_01569;gene_02074	0.000851659	0.00367682
	GO:0000155	9	1	phosphorelay sensor kinase activity	gene_03157	0.0163349	0.0276368
	GO:0004100	9	1	chitin synthase activity	gene_01282	0.0163349	0.0276368
	GO:0015616	9	1	DNA translocase activity	gene_07383	0.0163349	0.0276368
	GO:0042124	9	1	1,3-beta-glucanosyltransferase activity	gene_02910	0.0163349	0.0276368
	GO:0043138	9	1	3'-5' DNA helicase activity	gene_10563	0.0163349	0.0276368
	GO:0044212	9	1	transcription regulatory region DNA binding	gene_02507	0.0163349	0.0276368
	GO:0004359	8	2	glutaminase activity	gene_08802;gene_08801	0.000577308	0.00254503
	GO:0016538	8	2	cyclin-dependent protein serine/threonine kinase regulator activity	gene_06384;gene_10294	0.000577308	0.00254503
	GO:0003725	8	1	double-stranded RNA binding	gene_05541	0.0128942	0.0231282
	GO:0008408	8	1	3'-5' exonuclease activity	gene_02224	0.0128942	0.0231282
	GO:0016251	8	1	RNA polymerase II general transcription initiation factor activity	gene_07383	0.0128942	0.0231282
	GO:0004571	7	1	mannosyl-oligosaccharide 1,2-alpha-mannosidase activity	gene_00976	0.00981494	0.0187895
	GO:0005199	7	1	structural constituent of cell wall	gene_02350	0.00981494	0.0187895
	GO:0031491	7	1	nucleosome binding	gene_01618	0.00981494	0.0187895
	GO:0000014	6	1	single-stranded DNA endodeoxyribonuclease activity	gene_02224	0.0071155	0.0141857
	GO:0000403	6	1	Y-form DNA binding	gene_02224	0.0071155	0.0141857
	GO:0000977	6	1	RNA polymerase II regulatory region sequence-specific DNA binding	gene_01158	0.0071155	0.0141857
	GO:0000987	6	1	proximal promoter sequence-specific DNA binding	gene_02507	0.0071155	0.0141857
	GO:0001102	6	1	RNA polymerase II activating transcription factor binding	gene_02507	0.0071155	0.0141857
	GO:0004467	6	1	long-chain fatty acid-CoA ligase activity	gene_01079	0.0071155	0.0141857
	GO:0005034	6	1	osmosensor activity	gene_06081	0.0071155	0.0141857
	GO:0031624	6	1	ubiquitin conjugating enzyme binding	gene_02342	0.0071155	0.0141857
	GO:0045735	6	1	nutrient reservoir activity	gene_03812	0.0071155	0.0141857
	GO:0048037	6	1	cofactor binding	gene_03208	0.0071155	0.0141857
	GO:0061575	6	1	cyclin-dependent protein serine/threonine kinase activator activity	gene_10294	0.0071155	0.0141857
	GO:0070628	6	1	proteasome binding	gene_10510	0.0071155	0.0141857
	GO:0008301	5	2	DNA binding, bending	gene_01158;gene_01618	0.000108384	0.000916869
	GO:0004652	5	1	polynucleotide adenylyltransferase activity	gene_01313	0.00481472	0.0111218
	GO:0004715	5	1	non-membrane spanning protein tyrosine kinase activity	gene_01584	0.00481472	0.0111218
	GO:0005384	5	1	manganese ion transmembrane transporter activity	gene_01628	0.00481472	0.0111218
	GO:0042973	5	1	glucan endo-1,3-beta-D-glucosidase activity	gene_02910	0.00481472	0.0111218
	GO:0045027	5	1	DNA end binding	gene_02224	0.00481472	0.0111218
	GO:0004176	4	1	ATP-dependent peptidase activity	gene_06120	0.00293219	0.00777775
	GO:0015093	4	1	ferrous iron transmembrane transporter activity	gene_01628	0.00293219	0.00777775
	GO:0017150	4	1	tRNA dihydrouridine synthase activity	gene_06466	0.00293219	0.00777775
	GO:0043682	4	1	copper-transporting ATPase activity	gene_08598	0.00293219	0.00777775
	GO:0048365	4	1	Rac GTPase binding	gene_01515	0.00293219	0.00777775
	GO:0001139	3	1	RNA polymerase II complex recruiting activity	gene_07383	0.00148814	0.00490302
	GO:0003994	3	1	aconitate hydratase activity	gene_06501	0.00148814	0.00490302
	GO:0004088	3	1	carbamoyl-phosphate synthase (glutamine-hydrolyzing) activity	gene_00882	0.00148814	0.00490302
	GO:0004671	3	1	protein C-terminal S-isoprenylcysteine carboxyl O-methyltransferase activity	gene_06685	0.00148814	0.00490302
	GO:0005324	3	1	long-chain fatty acid transporter activity	gene_01079	0.00148814	0.00490302
	GO:0008310	3	1	single-stranded DNA 3'-5' exodeoxyribonuclease activity	gene_02224	0.00148814	0.00490302
	GO:0008311	3	1	double-stranded DNA 3'-5' exodeoxyribonuclease activity	gene_02224	0.00148814	0.00490302
	GO:0009927	3	1	histidine phosphotransfer kinase activity	gene_10472	0.00148814	0.00490302
	GO:0015079	3	1	potassium ion transmembrane transporter activity	gene_04939	0.00148814	0.00490302
	GO:0015385	3	1	sodium:proton antiporter activity	gene_07274	0.00148814	0.00490302
	GO:0050265	3	1	RNA uridylyltransferase activity	gene_01071	0.00148814	0.00490302
	GO:0050291	3	1	sphingosine N-acyltransferase activity	gene_06718	0.00148814	0.00490302
	GO:1990165	3	1	single-strand break-containing DNA binding	gene_05541	0.00148814	0.00490302
	GO:0001103	2	1	RNA polymerase II repressing transcription factor binding	gene_02507	0.000503517	0.00228407
	GO:0003870	2	1	5-aminolevulinate synthase activity	gene_01664	0.000503517	0.00228407
	GO:0003878	2	1	ATP citrate synthase activity	gene_03208	0.000503517	0.00228407
	GO:0004049	2	1	anthranilate synthase activity	gene_05969	0.000503517	0.00228407
	GO:0004068	2	1	aspartate 1-decarboxylase activity	gene_00016	0.000503517	0.00228407
	GO:0004089	2	1	carbonate dehydratase activity	gene_03015	0.000503517	0.00228407
	GO:0004354	2	1	glutamate dehydrogenase (NADP+) activity	gene_05128	0.000503517	0.00228407
	GO:0004476	2	1	mannose-6-phosphate isomerase activity	gene_03624	0.000503517	0.00228407
	GO:0004605	2	1	phosphatidate cytidylyltransferase activity	gene_03016	0.000503517	0.00228407
	GO:0004691	2	1	cAMP-dependent protein kinase activity	gene_01839	0.000503517	0.00228407
	GO:0004747	2	1	ribokinase activity	gene_00624	0.000503517	0.00228407
	GO:0004782	2	1	sulfinoalanine decarboxylase activity	gene_00016	0.000503517	0.00228407
	GO:0005458	2	1	GDP-mannose transmembrane transporter activity	gene_00814	0.000503517	0.00228407
	GO:0008440	2	1	inositol-1,4,5-trisphosphate 3-kinase activity	gene_02196	0.000503517	0.00228407
	GO:0008888	2	1	glycerol dehydrogenase [NAD+] activity	gene_04780	0.000503517	0.00228407
	GO:0031957	2	1	very long-chain fatty acid-CoA ligase activity	gene_01079	0.000503517	0.00228407
	GO:0033699	2	1	DNA 5'-adenosine monophosphate hydrolase activity	gene_05541	0.000503517	0.00228407
	GO:0047710	2	1	bis(5'-adenosyl)-triphosphatase activity	gene_08898	0.000503517	0.00228407
	GO:0120108	2	1	DNA-3'-diphospho-5'-guanosine diphosphatase	gene_05541	0.000503517	0.00228407
	GO:0140107	2	1	high-affinity potassium ion transmembrane transporter activity	gene_04939	0.000503517	0.00228407
	GO:0003861	1	1	3-isopropylmalate dehydratase activity	gene_00832	0	0
	GO:0003989	1	1	acetyl-CoA carboxylase activity	gene_09965	0	0
	GO:0004075	1	1	biotin carboxylase activity	gene_09965	0	0
	GO:0008296	1	1	3'-5'-exodeoxyribonuclease activity	gene_02224	0	0
	GO:0016639	1	1	oxidoreductase activity, acting on the CH-NH2 group of donors, NAD or NADP as acceptor	gene_05128	0	0
	GO:0016670	1	1	oxidoreductase activity, acting on a sulfur group of donors, oxygen as acceptor	gene_00662	0	0
	GO:0016843	1	1	amine-lyase activity	gene_08801	0	0
	GO:0017089	1	1	glycolipid transporter activity	gene_01270	0	0
	GO:0031682	1	1	G-protein gamma-subunit binding	gene_07387	0	0
	GO:0036381	1	1	pyridoxal 5'-phosphate synthase (glutamine hydrolysing) activity	gene_08801	0	0
	GO:0043424	1	1	protein histidine kinase binding	gene_10472	0	0
	GO:0044377	1	1	RNA polymerase II proximal promoter sequence-specific DNA binding, bending	gene_02507	0	0
	GO:0045140	1	1	inositol phosphoceramide synthase activity	gene_00104	0	0
	GO:0051861	1	1	glycolipid binding	gene_01270	0	0

## Sheet: Supplementary Table 8
Supplementary Table 8. GO analysis of differentially methylated genes (DMGs) with CHG hypermethylation
Category	GO ID	Total read count	DMG count	GO term	Local gene IDs*	p-value	q-value
Biological Process	GO:0008150	2240	108	biological_process	gene_08833;gene_10465;gene_09970;gene_08917;gene_04640;gene_03867;gene_01778;gene_06850;gene_05931;gene_08086;gene_03536;gene_02448;gene_04993;gene_03390;gene_02300;gene_01744;gene_03812;gene_01544;gene_05624;gene_06585;gene_07297;gene_07446;gene_06979;gene_00115;gene_08364;gene_02706;gene_01451;gene_09014;gene_00396;gene_04436;gene_05326;gene_08958;gene_04860;gene_06493;gene_09452;gene_00837;gen…	0.00779672	0.0177799
	GO:0055114	513	19	oxidation-reduction process	gene_00662;gene_05128;gene_00754;gene_10403;gene_02395;gene_04425;gene_03381;gene_08829;gene_07412;gene_03071;gene_02996;gene_04426;gene_07298;gene_03010;gene_07145;gene_10195;gene_00462;gene_01235;gene_03434	0.573246	0.593681
	GO:0055085	429	9	transmembrane transport	gene_05579;gene_07682;gene_03804;gene_01015;gene_09639;gene_02625;gene_09550;gene_04225;gene_04939	0.979583	0.981361
	GO:0006355	309	21	regulation of transcription, DNA-templated	gene_10775;gene_06261;gene_00962;gene_09229;gene_05089;gene_01712;gene_09216;gene_07383;gene_00946;gene_10512;gene_06040;gene_00783;gene_01030;gene_10326;gene_07977;gene_05709;gene_03086;gene_04834;gene_09561;gene_06818;gene_04975	0.00578223	0.0133828
	GO:0008152	279	8	metabolic process	gene_05571;gene_04039;gene_09688;gene_09475;gene_00719;gene_04397;gene_08103;gene_01949	0.787414	0.793161
	GO:0006351	175	9	transcription, DNA-templated	gene_09771;gene_06073;gene_09743;gene_06040;gene_01030;gene_07977;gene_05709;gene_03086;gene_09561	0.15962	0.187868
	GO:0006508	170	1	proteolysis	gene_01993	0.992369	0.992369
	GO:0005975	125	4	carbohydrate metabolic process	gene_02607;gene_09688;gene_10578;gene_08013	0.560081	0.581683
	GO:0006468	118	4	protein phosphorylation	gene_07191;gene_09794;gene_01525;gene_00144	0.508415	0.531022
	GO:0035690	113	6	cellular response to drug	gene_00950;gene_07682;gene_10406;gene_00850;gene_00281;gene_03257	0.163369	0.191872
	GO:0006412	108	1	translation	gene_08842	0.933128	0.936522
	GO:0016310	100	3	phosphorylation	gene_07191;gene_05038;gene_00144	0.567843	0.589191
	GO:0031505	93	3	fungal-type cell wall organization	gene_10406;gene_08838;gene_08031	0.51007	0.532247
	GO:0006886	88	1	intracellular protein transport	gene_05274	0.871147	0.875907
	GO:0030447	87	5	filamentous growth	gene_08838;gene_02332;gene_08618;gene_03553;gene_03257	0.132352	0.160391
	GO:0006281	85	2	DNA repair	gene_02274;gene_01618	0.663947	0.681225
	GO:0045944	84	8	positive regulation of transcription by RNA polymerase II	gene_05338;gene_00082;gene_01494;gene_01158;gene_00946;gene_10326;gene_08179;gene_02507	0.0059748	0.0137995
	GO:0006357	79	7	regulation of transcription by RNA polymerase II	gene_00082;gene_01494;gene_07977;gene_05709;gene_01995;gene_05871;gene_01618	0.0129271	0.0250818
	GO:0015031	79	1	protein transport	gene_03257	0.828712	0.834
	GO:0000122	75	4	negative regulation of transcription by RNA polymerase II	gene_01494;gene_05964;gene_00783;gene_02507	0.17798	0.206614
	GO:0006364	71	2	rRNA processing	gene_08523;gene_04809	0.541606	0.564088
	GO:0034599	69	4	cellular response to oxidative stress	gene_06664;gene_00082;gene_10390;gene_03157	0.139349	0.168686
	GO:0035556	67	4	intracellular signal transduction	gene_07191;gene_09794;gene_06473;gene_02330	0.127383	0.155738
	GO:0006511	65	4	ubiquitin-dependent protein catabolic process	gene_02381;gene_09599;gene_00920;gene_03792	0.115915	0.143625
	GO:0009267	64	1	cellular response to starvation	gene_08618	0.7298	0.741214
	GO:0030448	63	6	hyphal growth	gene_01070;gene_05018;gene_00850;gene_08618;gene_04834;gene_04291	0.0121268	0.0235705
	GO:0007165	62	9	signal transduction	gene_05038;gene_06473;gene_01525;gene_07348;gene_01012;gene_04987;gene_05669;gene_07387;gene_05474	0.00014782	0.000845561
	GO:0009405	61	1	pathogenesis	gene_10406	0.704996	0.718666
	GO:0006974	60	4	cellular response to DNA damage stimulus	gene_03906;gene_04828;gene_00920;gene_01618	0.0895632	0.115108
	GO:0036180	60	3	filamentous growth of a population of unicellular organisms in response to biotic stimulus	gene_02332;gene_08618;gene_03553	0.2157	0.245244
	GO:0043161	58	1	proteasome-mediated ubiquitin-dependent protein catabolic process	gene_09599	0.678328	0.694688
	GO:0006897	57	1	endocytosis	gene_03119	0.669013	0.685785
	GO:0016192	55	3	vesicle-mediated transport	gene_04666;gene_05274;gene_09336	0.174703	0.203238
	GO:0006338	54	7	chromatin remodeling	gene_02211;gene_10243;gene_07383;gene_00783;gene_02916;gene_08179;gene_01618	0.00121413	0.00483155
	GO:0006457	52	1	protein folding	gene_03389	0.619162	0.63705
	GO:0006629	51	3	lipid metabolic process	gene_03071;gene_07298;gene_03435	0.144104	0.173008
	GO:0006888	50	2	ER to Golgi vesicle-mediated transport	gene_05534;gene_08514	0.320579	0.347662
	GO:0036170	49	1	filamentous growth of a population of unicellular organisms in response to starvation	gene_08618	0.586583	0.604657
	GO:0019748	48	1	secondary metabolic process	gene_10406	0.575276	0.595225
	GO:0071555	44	3	cell wall organization	gene_05571;gene_09688;gene_08838	0.0965158	0.122054
	GO:0006325	40	3	chromatin organization	gene_02211;gene_00783;gene_00055	0.0733236	0.0972947
	GO:0006811	38	1	ion transport	gene_04939	0.450252	0.474764
	GO:0007049	37	4	cell cycle	gene_00946;gene_07348;gene_02507;gene_06203	0.0148333	0.0261597
	GO:0006091	37	1	generation of precursor metabolites and energy	gene_03208	0.436631	0.462168
	GO:0034605	36	1	cellular response to heat	gene_07348	0.42283	0.448419
	GO:0042254	36	1	ribosome biogenesis	gene_04809	0.42283	0.448419
	GO:0051301	35	1	cell division	gene_00946	0.408857	0.434854
	GO:0008202	34	1	steroid metabolic process	gene_02395	0.394722	0.421444
	GO:0018105	33	2	peptidyl-serine phosphorylation	gene_05474;gene_02330	0.142384	0.172171
	GO:0016125	31	1	sterol metabolic process	gene_00937	0.351453	0.377069
	GO:0032259	31	1	methylation	gene_09598	0.351453	0.377069
	GO:0032543	31	1	mitochondrial translation	gene_03677	0.351453	0.377069
	GO:0006366	30	2	transcription by RNA polymerase II	gene_07383;gene_01618	0.115313	0.14304
	GO:0006606	30	2	protein import into nucleus	gene_08309;gene_03435	0.115313	0.14304
	GO:0006633	30	1	fatty acid biosynthetic process	gene_07298	0.336785	0.362743
	GO:0007264	30	1	small GTPase mediated signal transduction	gene_01978	0.336785	0.362743
	GO:0009272	30	1	fungal-type cell wall biogenesis	gene_05571	0.336785	0.362743
	GO:0006644	29	2	phospholipid metabolic process	gene_09492;gene_02954	0.106767	0.132887
	GO:0000278	29	1	mitotic cell cycle	gene_06102	0.322021	0.347858
	GO:0009073	29	1	aromatic amino acid family biosynthetic process	gene_05969	0.322021	0.347858
	GO:0030437	29	1	ascospore formation	gene_01012	0.322021	0.347858
	GO:0006289	28	1	nucleotide-excision repair	gene_01070	0.307176	0.333781
	GO:0045454	28	1	cell redox homeostasis	gene_10390	0.307176	0.333781
	GO:0023052	27	2	signaling	gene_05474;gene_10238	0.0904724	0.115872
	GO:0051321	27	2	meiotic cell cycle	gene_00946;gene_06102	0.0904724	0.115872
	GO:0006520	27	1	cellular amino acid metabolic process	gene_05128	0.292269	0.318839
	GO:0007163	27	1	establishment or maintenance of cell polarity	gene_01070	0.292269	0.318839
	GO:0010468	27	1	regulation of gene expression	gene_07191	0.292269	0.318839
	GO:0045292	27	1	mRNA cis splicing, via spliceosome	gene_01823	0.292269	0.318839
	GO:0006879	26	3	cellular iron ion homeostasis	gene_04634;gene_08829;gene_10390	0.0184296	0.0321426
	GO:0009847	26	2	spore germination	gene_10406;gene_00783	0.0827504	0.1066
	GO:0010106	26	2	cellular response to iron ion starvation	gene_10406;gene_08829	0.0827504	0.1066
	GO:0006506	26	1	GPI anchor biosynthetic process	gene_06474	0.277321	0.305247
	GO:0006812	26	1	cation transport	gene_04939	0.277321	0.305247
	GO:0070787	25	2	conidiophore development	gene_04834;gene_00398	0.0753288	0.0997158
	GO:0000398	25	1	mRNA splicing, via spliceosome	gene_01823	0.262354	0.29051
	GO:0003333	25	1	amino acid transmembrane transport	gene_09526	0.262354	0.29051
	GO:0006631	24	3	fatty acid metabolic process	gene_09705;gene_07298;gene_06665	0.013939	0.0257632
	GO:0034613	24	2	cellular protein localization	gene_05135;gene_02166	0.0682197	0.0910492
	GO:0000027	24	1	ribosomal large subunit assembly	gene_08523	0.247392	0.275046
	GO:0007015	24	1	actin filament organization	gene_08618	0.247392	0.275046
	GO:0006979	23	3	response to oxidative stress	gene_00082;gene_07298;gene_04291	0.0119833	0.0233325
	GO:0006368	23	2	transcription elongation from RNA polymerase II promoter	gene_04827;gene_07383	0.0614346	0.0834241
	GO:0007005	22	2	mitochondrion organization	gene_04945;gene_03240	0.0549844	0.0769364
	GO:0000209	22	1	protein polyubiquitination	gene_03792	0.217589	0.245371
	GO:0006032	22	1	chitin catabolic process	gene_09688	0.217589	0.245371
	GO:0006099	22	1	tricarboxylic acid cycle	gene_03381	0.217589	0.245371
	GO:0006623	22	1	protein targeting to vacuole	gene_03240	0.217589	0.245371
	GO:0016573	22	1	histone acetylation	gene_07383	0.217589	0.245371
	GO:0000909	21	5	sporocarp development involved in sexual reproduction	gene_09229;gene_05089;gene_09743;gene_04834;gene_04291	0.000124081	0.000713468
	GO:0006139	21	1	nucleobase-containing compound metabolic process	gene_06769	0.202807	0.231062
	GO:0006367	21	1	transcription initiation from RNA polymerase II promoter	gene_07383	0.202807	0.231062
	GO:0006486	21	1	protein glycosylation	gene_06474	0.202807	0.231062
	GO:0016311	21	1	dephosphorylation	gene_06203	0.202807	0.231062
	GO:0023014	21	1	signal transduction by protein phosphorylation	gene_05038	0.202807	0.231062
	GO:0030702	21	1	chromatin silencing at centromere	gene_08523	0.202807	0.231062
	GO:0042026	21	1	protein refolding	gene_03389	0.202807	0.231062
	GO:0048315	21	1	conidium formation	gene_04834	0.202807	0.231062
	GO:0071470	21	1	cellular response to osmotic stress	gene_09605	0.202807	0.231062
	GO:1900772	20	1	fumitremorgin B biosynthetic process	gene_10406	0.188147	0.217047
	GO:0000070	19	2	mitotic sister chromatid segregation	gene_04828;gene_00055	0.0377389	0.0548208
	GO:0030036	19	2	actin cytoskeleton organization	gene_10391;gene_10390	0.0377389	0.0548208
	GO:0042493	19	2	response to drug	gene_07191;gene_02395	0.0377389	0.0548208
	GO:0000245	19	1	spliceosomal complex assembly	gene_07191	0.173645	0.20222
	GO:0006470	19	1	protein dephosphorylation	gene_06203	0.173645	0.20222
	GO:1900781	19	1	fumiquinazoline C biosynthetic process	gene_10406	0.173645	0.20222
	GO:0016126	18	1	sterol biosynthetic process	gene_06119	0.159339	0.187738
	GO:0033617	18	1	mitochondrial respiratory chain complex IV assembly	gene_02774	0.159339	0.187738
	GO:0007275	17	3	multicellular organism development	gene_05669;gene_02507;gene_03929	0.00388628	0.010748
	GO:0016226	17	2	iron-sulfur cluster assembly	gene_08959;gene_05082	0.0280726	0.0443622
	GO:0043486	17	2	histone exchange	gene_02211;gene_10243	0.0280726	0.0443622
	GO:0008652	17	1	cellular amino acid biosynthetic process	gene_08045	0.14527	0.173008
	GO:0042147	17	1	retrograde transport, endosome to Golgi	gene_05194	0.14527	0.173008
	GO:0045324	17	1	late endosome to vacuole transport	gene_03240	0.14527	0.173008
	GO:1900805	17	1	brevianamide F biosynthetic process	gene_10406	0.14527	0.173008
	GO:1900809	17	1	fumigaclavine C biosynthetic process	gene_10406	0.14527	0.173008
	GO:0006525	16	2	arginine metabolic process	gene_08918;gene_02507	0.0238044	0.0385338
	GO:0006855	16	1	drug transmembrane transport	gene_04225	0.131482	0.159513
	GO:0007018	16	1	microtubule-based movement	gene_00607	0.131482	0.159513
	GO:0007039	16	1	protein catabolic process in the vacuole	gene_10238	0.131482	0.159513
	GO:0009408	16	1	response to heat	gene_04291	0.131482	0.159513
	GO:0051123	16	1	RNA polymerase II preinitiation complex assembly	gene_07383	0.131482	0.159513
	GO:0001302	15	2	replicative cell aging	gene_01012;gene_08179	0.0199161	0.034463
	GO:0007124	15	2	pseudohyphal growth	gene_01012;gene_00783	0.0199161	0.034463
	GO:0008654	15	2	phospholipid biosynthetic process	gene_02954;gene_03435	0.0199161	0.034463
	GO:0050684	15	1	regulation of mRNA processing	gene_07191	0.118023	0.144614
	GO:0000160	14	2	phosphorelay signal transduction system	gene_05038;gene_03157	0.0164076	0.0287069
	GO:0006890	14	2	retrograde vesicle-mediated transport, Golgi to ER	gene_05960;gene_08514	0.0164076	0.0287069
	GO:0000920	14	1	septum digestion after cytokinesis	gene_09688	0.104942	0.131058
	GO:0016052	14	1	carbohydrate catabolic process	gene_05571	0.104942	0.131058
	GO:0032436	14	1	positive regulation of proteasomal ubiquitin-dependent protein catabolic process	gene_03792	0.104942	0.131058
	GO:0040009	14	1	regulation of growth rate	gene_08618	0.104942	0.131058
	GO:0045332	14	1	phospholipid translocation	gene_05194	0.104942	0.131058
	GO:0006406	13	2	mRNA export from nucleus	gene_03565;gene_04615	0.0132767	0.0256698
	GO:0008361	13	2	regulation of cell size	gene_07191;gene_01012	0.0132767	0.0256698
	GO:0000768	13	1	syncytium formation by plasma membrane fusion	gene_04982	0.092294	0.116849
	GO:0006094	13	1	gluconeogenesis	gene_08566	0.092294	0.116849
	GO:0006882	13	1	cellular zinc ion homeostasis	gene_04616	0.092294	0.116849
	GO:0006906	13	1	vesicle fusion	gene_08514	0.092294	0.116849
	GO:0007117	13	1	budding cell bud growth	gene_05571	0.092294	0.116849
	GO:0019740	13	1	nitrogen utilization	gene_07682	0.092294	0.116849
	GO:0030148	13	1	sphingolipid biosynthetic process	gene_03071	0.092294	0.116849
	GO:0043066	12	3	negative regulation of apoptotic process	gene_08802;gene_04945;gene_07298	0.000946394	0.00483155
	GO:0000338	12	2	protein deneddylation	gene_02381;gene_03929	0.0105185	0.0205529
	GO:0009409	12	2	response to cold	gene_04291;gene_01724	0.0105185	0.0205529
	GO:0044011	12	2	single-species biofilm formation on inanimate substrate	gene_07977;gene_05709	0.0105185	0.0205529
	GO:0001402	12	1	signal transduction involved in filamentous growth	gene_07348	0.0801375	0.103718
	GO:0001403	12	1	invasive growth in response to glucose limitation	gene_01012	0.0801375	0.103718
	GO:0006414	12	1	translational elongation	gene_00850	0.0801375	0.103718
	GO:0007094	12	1	mitotic spindle assembly checkpoint	gene_06055	0.0801375	0.103718
	GO:0018107	12	1	peptidyl-threonine phosphorylation	gene_05474	0.0801375	0.103718
	GO:0019236	12	1	response to pheromone	gene_07348	0.0801375	0.103718
	GO:0031122	12	1	cytoplasmic microtubule organization	gene_06102	0.0801375	0.103718
	GO:0045892	12	1	negative regulation of transcription, DNA-templated	gene_02274	0.0801375	0.103718
	GO:0071805	12	1	potassium ion transmembrane transport	gene_04939	0.0801375	0.103718
	GO:0000281	11	2	mitotic cytokinesis	gene_04888;gene_05669	0.00812546	0.0177799
	GO:0001934	11	2	positive regulation of protein phosphorylation	gene_06119;gene_07387	0.00812546	0.0177799
	GO:0006725	11	2	cellular aromatic compound metabolic process	gene_04426;gene_04667	0.00812546	0.0177799
	GO:0042307	11	2	positive regulation of protein import into nucleus	gene_07191;gene_07298	0.00812546	0.0177799
	GO:0061408	11	2	positive regulation of transcription from RNA polymerase II promoter in response to heat stress	gene_00082;gene_08179	0.00812546	0.0177799
	GO:1904262	11	2	negative regulation of TORC1 signaling	gene_00762;gene_05135	0.00812546	0.0177799
	GO:0000272	11	1	polysaccharide catabolic process	gene_09688	0.0685343	0.0910492
	GO:0002183	11	1	cytoplasmic translational initiation	gene_08044	0.0685343	0.0910492
	GO:0006267	11	1	pre-replicative complex assembly involved in nuclear cell cycle DNA replication	gene_08523	0.0685343	0.0910492
	GO:0006302	11	1	double-strand break repair	gene_04828	0.0685343	0.0910492
	GO:0006646	11	1	phosphatidylethanolamine biosynthetic process	gene_09492	0.0685343	0.0910492
	GO:0006857	11	1	oligopeptide transport	gene_07682	0.0685343	0.0910492
	GO:0008360	11	1	regulation of cell shape	gene_02166	0.0685343	0.0910492
	GO:0032511	11	1	late endosome to vacuole transport via multivesicular body sorting pathway	gene_03257	0.0685343	0.0910492
	GO:0035672	11	1	oligopeptide transmembrane transport	gene_07682	0.0685343	0.0910492
	GO:0046854	11	1	phosphatidylinositol phosphorylation	gene_09605	0.0685343	0.0910492
	GO:0006805	10	2	xenobiotic metabolic process	gene_03236;gene_02874	0.00608704	0.0139132
	GO:0009636	10	2	response to toxic substance	gene_02395;gene_07145	0.00608704	0.0139132
	GO:0009651	10	2	response to salt stress	gene_09705;gene_04291	0.00608704	0.0139132
	GO:0034755	10	2	iron ion transmembrane transport	gene_07080;gene_07058	0.00608704	0.0139132
	GO:0000011	10	1	vacuole inheritance	gene_03553	0.0575509	0.0785224
	GO:0000750	10	1	pheromone-dependent signal transduction involved in conjugation with cellular fusion	gene_07348	0.0575509	0.0785224
	GO:0006488	10	1	dolichol-linked oligosaccharide biosynthetic process	gene_06474	0.0575509	0.0785224
	GO:0006665	10	1	sphingolipid metabolic process	gene_03071	0.0575509	0.0785224
	GO:0006807	10	1	nitrogen compound metabolic process	gene_09701	0.0575509	0.0785224
	GO:0007623	10	1	circadian rhythm	gene_00398	0.0575509	0.0785224
	GO:0008284	10	1	positive regulation of cell proliferation	gene_07298	0.0575509	0.0785224
	GO:0009611	10	1	response to wounding	gene_02395	0.0575509	0.0785224
	GO:0016584	10	1	nucleosome positioning	gene_05964	0.0575509	0.0785224
	GO:0042149	10	1	cellular response to glucose starvation	gene_10238	0.0575509	0.0785224
	GO:0051225	10	1	spindle assembly	gene_06102	0.0575509	0.0785224
	GO:0051315	10	1	attachment of mitotic spindle microtubules to kinetochore	gene_06055	0.0575509	0.0785224
	GO:0006342	9	2	chromatin silencing	gene_08838;gene_05964	0.00438926	0.010748
	GO:0007064	9	2	mitotic sister chromatid cohesion	gene_08309;gene_04828	0.00438926	0.010748
	GO:0043547	9	2	positive regulation of GTPase activity	gene_05135;gene_07387	0.00438926	0.010748
	GO:0000413	9	1	protein peptidyl-prolyl isomerization	gene_03389	0.0472581	0.0663778
	GO:0006656	9	1	phosphatidylcholine biosynthetic process	gene_09492	0.0472581	0.0663778
	GO:0007186	9	1	G protein-coupled receptor signaling pathway	gene_01012	0.0472581	0.0663778
	GO:0008610	9	1	lipid biosynthetic process	gene_03071	0.0472581	0.0663778
	GO:0010971	9	1	positive regulation of G2/M transition of mitotic cell cycle	gene_03929	0.0472581	0.0663778
	GO:0019878	9	1	lysine biosynthetic process via aminoadipic acid	gene_03434	0.0472581	0.0663778
	GO:0030003	9	1	cellular cation homeostasis	gene_07191	0.0472581	0.0663778
	GO:0031929	9	1	TOR signaling	gene_09794	0.0472581	0.0663778
	GO:0034501	9	1	protein localization to kinetochore	gene_06055	0.0472581	0.0663778
	GO:0034976	9	1	response to endoplasmic reticulum stress	gene_02996	0.0472581	0.0663778
	GO:0043065	9	1	positive regulation of apoptotic process	gene_07298	0.0472581	0.0663778
	GO:0071852	9	1	fungal-type cell wall organization or biogenesis	gene_08031	0.0472581	0.0663778
	GO:0010811	8	2	positive regulation of cell-substrate adhesion	gene_07977;gene_05709	0.00301449	0.00901896
	GO:0033215	8	2	iron assimilation by reduction and transport	gene_07080;gene_07058	0.00301449	0.00901896
	GO:0051056	8	2	regulation of small GTPase mediated signal transduction	gene_01978;gene_05135	0.00301449	0.00901896
	GO:0006415	8	1	translational termination	gene_03677	0.0377317	0.0548208
	GO:0006446	8	1	regulation of translational initiation	gene_08044	0.0377317	0.0548208
	GO:0006810	8	1	transport	gene_05534	0.0377317	0.0548208
	GO:0006817	8	1	phosphate ion transport	gene_08843	0.0377317	0.0548208
	GO:0006995	8	1	cellular response to nitrogen starvation	gene_00762	0.0377317	0.0548208
	GO:0007076	8	1	mitotic chromosome condensation	gene_00055	0.0377317	0.0548208
	GO:0009615	8	1	response to virus	gene_02395	0.0377317	0.0548208
	GO:0015809	8	1	arginine transport	gene_09550	0.0377317	0.0548208
	GO:0030174	8	1	regulation of DNA-dependent DNA replication initiation	gene_08523	0.0377317	0.0548208
	GO:0036246	8	1	phytochelatin 2 import into vacuole	gene_01015	0.0377317	0.0548208
	GO:0042766	8	1	nucleosome mobilization	gene_07383	0.0377317	0.0548208
	GO:0045053	8	1	protein retention in Golgi apparatus	gene_03240	0.0377317	0.0548208
	GO:0071712	8	1	ER-associated misfolded protein catabolic process	gene_01070	0.0377317	0.0548208
	GO:0071996	8	1	glutathione transmembrane import into vacuole	gene_01015	0.0377317	0.0548208
	GO:1900087	8	1	positive regulation of G1/S transition of mitotic cell cycle	gene_02395	0.0377317	0.0548208
	GO:1990573	8	1	potassium ion import across plasma membrane	gene_04939	0.0377317	0.0548208
	GO:0000103	7	1	sulfate assimilation	gene_09605	0.0290524	0.0443622
	GO:0000105	7	1	histidine biosynthetic process	gene_08045	0.0290524	0.0443622
	GO:0000256	7	1	allantoin catabolic process	gene_06769	0.0290524	0.0443622
	GO:0000282	7	1	cellular bud site selection	gene_05018	0.0290524	0.0443622
	GO:0000290	7	1	deadenylation-dependent decapping of nuclear-transcribed mRNA	gene_06997	0.0290524	0.0443622
	GO:0001889	7	1	liver development	gene_02395	0.0290524	0.0443622
	GO:0006376	7	1	mRNA splice site selection	gene_07191	0.0290524	0.0443622
	GO:0006534	7	1	cysteine metabolic process	gene_09605	0.0290524	0.0443622
	GO:0006537	7	1	glutamate biosynthetic process	gene_05128	0.0290524	0.0443622
	GO:0006797	7	1	polyphosphate metabolic process	gene_06525	0.0290524	0.0443622
	GO:0006813	7	1	potassium ion transport	gene_04939	0.0290524	0.0443622
	GO:0006873	7	1	cellular ion homeostasis	gene_07191	0.0290524	0.0443622
	GO:0015891	7	1	siderophore transport	gene_08829	0.0290524	0.0443622
	GO:0016197	7	1	endosomal transport	gene_05274	0.0290524	0.0443622
	GO:0017144	7	1	drug metabolic process	gene_02395	0.0290524	0.0443622
	GO:0030007	7	1	cellular potassium ion homeostasis	gene_04939	0.0290524	0.0443622
	GO:0032120	7	1	ascospore-type prospore membrane assembly	gene_03240	0.0290524	0.0443622
	GO:0043248	7	1	proteasome assembly	gene_00920	0.0290524	0.0443622
	GO:0071277	7	1	cellular response to calcium ion	gene_08031	0.0290524	0.0443622
	GO:0071931	7	1	positive regulation of transcription involved in G1/S transition of mitotic cell cycle	gene_02211	0.0290524	0.0443622
	GO:0032496	6	2	response to lipopolysaccharide	gene_02395;gene_07298	0.00114278	0.00483155
	GO:0001676	6	1	long-chain fatty acid metabolic process	gene_09705	0.0213063	0.0347447
	GO:0002933	6	1	lipid hydroxylation	gene_02395	0.0213063	0.0347447
	GO:0006024	6	1	glycosaminoglycan biosynthetic process	gene_03010	0.0213063	0.0347447
	GO:0006048	6	1	UDP-N-acetylglucosamine biosynthetic process	gene_04465	0.0213063	0.0347447
	GO:0006067	6	1	ethanol metabolic process	gene_04794	0.0213063	0.0347447
	GO:0006654	6	1	phosphatidic acid biosynthetic process	gene_06665	0.0213063	0.0347447
	GO:0006998	6	1	nuclear envelope organization	gene_06062	0.0213063	0.0347447
	GO:0006999	6	1	nuclear pore organization	gene_06062	0.0213063	0.0347447
	GO:0008283	6	1	cell proliferation	gene_02395	0.0213063	0.0347447
	GO:0009085	6	1	lysine biosynthetic process	gene_03434	0.0213063	0.0347447
	GO:0009308	6	1	amine metabolic process	gene_02395	0.0213063	0.0347447
	GO:0015940	6	1	pantothenate biosynthetic process	gene_09598	0.0213063	0.0347447
	GO:0019722	6	1	calcium-mediated signaling	gene_08841	0.0213063	0.0347447
	GO:0030833	6	1	regulation of actin filament polymerization	gene_10391	0.0213063	0.0347447
	GO:0031106	6	1	septin ring organization	gene_04888	0.0213063	0.0347447
	GO:0033615	6	1	mitochondrial proton-transporting ATP synthase complex assembly	gene_00720	0.0213063	0.0347447
	GO:0035435	6	1	phosphate ion transmembrane transport	gene_08843	0.0213063	0.0347447
	GO:0061641	6	1	CENP-A containing chromatin organization	gene_03906	0.0213063	0.0347447
	GO:0061780	6	1	mitotic cohesin loading	gene_04828	0.0213063	0.0347447
	GO:0071902	6	1	positive regulation of protein serine/threonine kinase activity	gene_07387	0.0213063	0.0347447
	GO:1904659	6	1	glucose transmembrane transport	gene_00281	0.0213063	0.0347447
	GO:2001310	6	1	gliotoxin biosynthetic process	gene_09550	0.0213063	0.0347447
	GO:0061404	5	3	positive regulation of transcription from RNA polymerase II promoter in response to increased salt	gene_00082;gene_10326;gene_08179	1.19434e-05	7.32531e-05
	GO:0000023	5	2	maltose metabolic process	gene_07977;gene_05709	0.000588742	0.00318613
	GO:0000025	5	2	maltose catabolic process	gene_07977;gene_05709	0.000588742	0.00318613
	GO:0000187	5	2	activation of MAPK activity	gene_05669;gene_07387	0.000588742	0.00318613
	GO:0007265	5	2	Ras protein signal transduction	gene_06473;gene_05669	0.000588742	0.00318613
	GO:1900189	5	2	positive regulation of cell adhesion involved in single-species biofilm formation	gene_07977;gene_05709	0.000588742	0.00318613
	GO:0000162	5	1	tryptophan biosynthetic process	gene_05969	0.0145851	0.0257632
	GO:0000288	5	1	nuclear-transcribed mRNA catabolic process, deadenylation-dependent decay	gene_08979	0.0145851	0.0257632
	GO:0000712	5	1	resolution of meiotic recombination intermediates	gene_00055	0.0145851	0.0257632
	GO:0001324	5	1	age-dependent response to oxidative stress involved in chronological cell aging	gene_08179	0.0145851	0.0257632
	GO:0001516	5	1	prostaglandin biosynthetic process	gene_07298	0.0145851	0.0257632
	GO:0001525	5	1	angiogenesis	gene_07298	0.0145851	0.0257632
	GO:0006097	5	1	glyoxylate cycle	gene_03381	0.0145851	0.0257632
	GO:0007231	5	1	osmosensory signaling pathway	gene_02332	0.0145851	0.0257632
	GO:0007232	5	1	osmosensory signaling pathway via Sho1 osmosensor	gene_07348	0.0145851	0.0257632
	GO:0008272	5	1	sulfate transport	gene_08843	0.0145851	0.0257632
	GO:0008285	5	1	negative regulation of cell proliferation	gene_07298	0.0145851	0.0257632
	GO:0009228	5	1	thiamine biosynthetic process	gene_01666	0.0145851	0.0257632
	GO:0016117	5	1	carotenoid biosynthetic process	gene_00398	0.0145851	0.0257632
	GO:0030334	5	1	regulation of cell migration	gene_06561	0.0145851	0.0257632
	GO:0030866	5	1	cortical actin cytoskeleton organization	gene_07387	0.0145851	0.0257632
	GO:0032889	5	1	regulation of vacuole fusion, non-autophagic	gene_08618	0.0145851	0.0257632
	GO:0032995	5	1	regulation of fungal-type cell wall biogenesis	gene_02293	0.0145851	0.0257632
	GO:0034389	5	1	lipid droplet organization	gene_00783	0.0145851	0.0257632
	GO:0036091	5	1	positive regulation of transcription from RNA polymerase II promoter in response to oxidative stress	gene_00082	0.0145851	0.0257632
	GO:0042127	5	1	regulation of cell proliferation	gene_07298	0.0145851	0.0257632
	GO:0042752	5	1	regulation of circadian rhythm	gene_06073	0.0145851	0.0257632
	GO:0044878	5	1	mitotic cytokinesis checkpoint	gene_02330	0.0145851	0.0257632
	GO:0045859	5	1	regulation of protein kinase activity	gene_07348	0.0145851	0.0257632
	GO:0051415	5	1	microtubule nucleation by interphase microtubule organizing center	gene_06102	0.0145851	0.0257632
	GO:0051974	5	1	negative regulation of telomerase activity	gene_04809	0.0145851	0.0257632
	GO:0061077	5	1	chaperone-mediated protein folding	gene_01993	0.0145851	0.0257632
	GO:0061246	5	1	establishment or maintenance of bipolar cell polarity regulating cell shape	gene_02166	0.0145851	0.0257632
	GO:0062022	5	1	mitotic cohesin ssDNA (lagging strand) loading	gene_04828	0.0145851	0.0257632
	GO:0071970	5	1	fungal-type cell wall (1->3)-beta-D-glucan biosynthetic process	gene_08838	0.0145851	0.0257632
	GO:0106035	5	1	protein maturation by [4Fe-4S] cluster transfer	gene_09964	0.0145851	0.0257632
	GO:1901583	5	1	tetrapeptide transmembrane transport	gene_07682	0.0145851	0.0257632
	GO:1902358	5	1	sulfate transmembrane transport	gene_08843	0.0145851	0.0257632
	GO:1990145	5	1	maintenance of translational fidelity	gene_00850	0.0145851	0.0257632
	GO:2000134	5	1	negative regulation of G1/S transition of mitotic cell cycle	gene_05135	0.0145851	0.0257632
	GO:0007188	4	3	adenylate cyclase-modulating G protein-coupled receptor signaling pathway	gene_06473;gene_01012;gene_07387	2.46629e-06	1.52111e-05
	GO:0008615	4	2	pyridoxine biosynthetic process	gene_08802;gene_00462	0.000242663	0.0013599
	GO:1903473	4	2	positive regulation of mitotic actomyosin contractile ring contraction	gene_08031;gene_02330	0.000242663	0.0013599
	GO:0001174	4	1	transcriptional start site selection at RNA polymerase II promoter	gene_07383	0.00898657	0.0177799
	GO:0001666	4	1	response to hypoxia	gene_02395	0.00898657	0.0177799
	GO:0006101	4	1	citrate metabolic process	gene_03208	0.00898657	0.0177799
	GO:0006265	4	1	DNA topological change	gene_00055	0.00898657	0.0177799
	GO:0006536	4	1	glutamate metabolic process	gene_01716	0.00898657	0.0177799
	GO:0006740	4	1	NADPH regeneration	gene_06984	0.00898657	0.0177799
	GO:0006835	4	1	dicarboxylic acid transport	gene_08843	0.00898657	0.0177799
	GO:0006898	4	1	receptor-mediated endocytosis	gene_01375	0.00898657	0.0177799
	GO:0006954	4	1	inflammatory response	gene_07298	0.00898657	0.0177799
	GO:0007050	4	1	cell cycle arrest	gene_07348	0.00898657	0.0177799
	GO:0007329	4	1	positive regulation of transcription from RNA polymerase II promoter by pheromones	gene_10326	0.00898657	0.0177799
	GO:0008217	4	1	regulation of blood pressure	gene_07298	0.00898657	0.0177799
	GO:0009168	4	1	purine ribonucleoside monophosphate biosynthetic process	gene_09193	0.00898657	0.0177799
	GO:0009585	4	1	red, far-red light phototransduction	gene_03929	0.00898657	0.0177799
	GO:0009814	4	1	defense response, incompatible interaction	gene_06665	0.00898657	0.0177799
	GO:0010255	4	1	glucose mediated signaling pathway	gene_01012	0.00898657	0.0177799
	GO:0016570	4	1	histone modification	gene_04827	0.00898657	0.0177799
	GO:0018298	4	1	protein-chromophore linkage	gene_02274	0.00898657	0.0177799
	GO:0019439	4	1	aromatic compound catabolic process	gene_04426	0.00898657	0.0177799
	GO:0019915	4	1	lipid storage	gene_10084	0.00898657	0.0177799
	GO:0019933	4	1	cAMP-mediated signaling	gene_07387	0.00898657	0.0177799
	GO:0030838	4	1	positive regulation of actin filament polymerization	gene_07387	0.00898657	0.0177799
	GO:0031028	4	1	septation initiation signaling	gene_02330	0.00898657	0.0177799
	GO:0031087	4	1	deadenylation-independent decapping of nuclear-transcribed mRNA	gene_06997	0.00898657	0.0177799
	GO:0032091	4	1	negative regulation of protein binding	gene_05135	0.00898657	0.0177799
	GO:0032874	4	1	positive regulation of stress-activated MAPK cascade	gene_03157	0.00898657	0.0177799
	GO:0033138	4	1	positive regulation of peptidyl-serine phosphorylation	gene_07298	0.00898657	0.0177799
	GO:0034097	4	1	response to cytokine	gene_07298	0.00898657	0.0177799
	GO:0034316	4	1	negative regulation of Arp2/3 complex-mediated actin nucleation	gene_02272	0.00898657	0.0177799
	GO:0035335	4	1	peptidyl-tyrosine dephosphorylation	gene_06203	0.00898657	0.0177799
	GO:0043085	4	1	positive regulation of catalytic activity	gene_04809	0.00898657	0.0177799
	GO:0044237	4	1	cellular metabolic process	gene_06383	0.00898657	0.0177799
	GO:0045455	4	1	ecdysteroid metabolic process	gene_02996	0.00898657	0.0177799
	GO:0046483	4	1	heterocycle metabolic process	gene_02395	0.00898657	0.0177799
	GO:0046578	4	1	regulation of Ras protein signal transduction	gene_07387	0.00898657	0.0177799
	GO:0046677	4	1	response to antibiotic	gene_02395	0.00898657	0.0177799
	GO:0046685	4	1	response to arsenic-containing substance	gene_02395	0.00898657	0.0177799
	GO:0046907	4	1	intracellular transport	gene_04982	0.00898657	0.0177799
	GO:0048565	4	1	digestive tract development	gene_02395	0.00898657	0.0177799
	GO:0061406	4	1	positive regulation of transcription from RNA polymerase II promoter in response to glucose starvation	gene_08179	0.00898657	0.0177799
	GO:0070988	4	1	demethylation	gene_02395	0.00898657	0.0177799
	GO:1990920	4	1	proteasome localization to nuclear periphery	gene_03906	0.00898657	0.0177799
	GO:0006741	3	2	NADP biosynthetic process	gene_04634;gene_06664	6.25155e-05	0.000363248
	GO:0006935	3	2	chemotaxis	gene_05669;gene_07387	6.25155e-05	0.000363248
	GO:0019674	3	2	NAD metabolic process	gene_04634;gene_06664	6.25155e-05	0.000363248
	GO:0061422	3	2	positive regulation of transcription from RNA polymerase II promoter in response to alkaline pH	gene_10326;gene_08179	6.25155e-05	0.000363248
	GO:0071468	3	2	cellular response to acidic pH	gene_02332;gene_08179	6.25155e-05	0.000363248
	GO:0002084	3	1	protein depalmitoylation	gene_06665	0.00461462	0.010748
	GO:0006038	3	1	cell wall chitin biosynthetic process	gene_10326	0.00461462	0.010748
	GO:0006102	3	1	isocitrate metabolic process	gene_03381	0.00461462	0.010748
	GO:0006432	3	1	phenylalanyl-tRNA aminoacylation	gene_08842	0.00461462	0.010748
	GO:0006778	3	1	porphyrin-containing compound metabolic process	gene_02395	0.00461462	0.010748
	GO:0006909	3	1	phagocytosis	gene_07387	0.00461462	0.010748
	GO:0007169	3	1	transmembrane receptor protein tyrosine kinase signaling pathway	gene_04945	0.00461462	0.010748
	GO:0007613	3	1	memory	gene_07298	0.00461462	0.010748
	GO:0008204	3	1	ergosterol metabolic process	gene_07880	0.00461462	0.010748
	GO:0008612	3	1	peptidyl-lysine modification to peptidyl-hypusine	gene_08918	0.00461462	0.010748
	GO:0008655	3	1	pyrimidine-containing compound salvage	gene_04397	0.00461462	0.010748
	GO:0009229	3	1	thiamine diphosphate biosynthetic process	gene_01666	0.00461462	0.010748
	GO:0009404	3	1	toxin metabolic process	gene_02395	0.00461462	0.010748
	GO:0009624	3	1	response to nematode	gene_02395	0.00461462	0.010748
	GO:0009635	3	1	response to herbicide	gene_02395	0.00461462	0.010748
	GO:0009640	3	1	photomorphogenesis	gene_03929	0.00461462	0.010748
	GO:0010033	3	1	response to organic substance	gene_02395	0.00461462	0.010748
	GO:0010673	3	1	positive regulation of transcription from RNA polymerase II promoter involved in meiotic cell cycle	gene_00783	0.00461462	0.010748
	GO:0010674	3	1	negative regulation of transcription from RNA polymerase II promoter involved in meiotic cell cycle	gene_00783	0.00461462	0.010748
	GO:0018106	3	1	peptidyl-histidine phosphorylation	gene_05038	0.00461462	0.010748
	GO:0018894	3	1	dibenzo-p-dioxin metabolic process	gene_02395	0.00461462	0.010748
	GO:0019358	3	1	nicotinate nucleotide salvage	gene_04397	0.00461462	0.010748
	GO:0019371	3	1	cyclooxygenase pathway	gene_07298	0.00461462	0.010748
	GO:0030216	3	1	keratinocyte differentiation	gene_07298	0.00461462	0.010748
	GO:0031081	3	1	nuclear pore distribution	gene_06062	0.00461462	0.010748
	GO:0031394	3	1	positive regulation of prostaglandin biosynthetic process	gene_07298	0.00461462	0.010748
	GO:0031622	3	1	positive regulation of fever generation	gene_07298	0.00461462	0.010748
	GO:0032012	3	1	regulation of ARF protein signal transduction	gene_05409	0.00461462	0.010748
	GO:0032502	3	1	developmental process	gene_02395	0.00461462	0.010748
	GO:0032786	3	1	positive regulation of DNA-templated transcription, elongation	gene_04615	0.00461462	0.010748
	GO:0034356	3	1	NAD biosynthesis via nicotinamide riboside salvage pathway	gene_04397	0.00461462	0.010748
	GO:0034428	3	1	nuclear-transcribed mRNA catabolic process, exonucleolytic, 5'-3'	gene_06997	0.00461462	0.010748
	GO:0034728	3	1	nucleosome organization	gene_02211	0.00461462	0.010748
	GO:0035902	3	1	response to immobilization stress	gene_02395	0.00461462	0.010748
	GO:0036278	3	1	positive regulation of transcription from RNA polymerase II promoter in response to nitrogen starvation	gene_08179	0.00461462	0.010748
	GO:0038203	3	1	TORC2 signaling	gene_06938	0.00461462	0.010748
	GO:0042823	3	1	pyridoxal phosphate biosynthetic process	gene_08802	0.00461462	0.010748
	GO:0043154	3	1	negative regulation of cysteine-type endopeptidase activity involved in apoptotic process	gene_07298	0.00461462	0.010748
	GO:0045901	3	1	positive regulation of translational elongation	gene_00850	0.00461462	0.010748
	GO:0048661	3	1	positive regulation of smooth muscle cell proliferation	gene_07298	0.00461462	0.010748
	GO:0050665	3	1	hydrogen peroxide biosynthetic process	gene_02395	0.00461462	0.010748
	GO:0051306	3	1	mitotic sister chromatid separation	gene_00055	0.00461462	0.010748
	GO:0052699	3	1	ergothioneine biosynthetic process	gene_08607	0.00461462	0.010748
	GO:0061402	3	1	positive regulation of transcription from RNA polymerase II promoter in response to acidic pH	gene_08179	0.00461462	0.010748
	GO:0070879	3	1	fungal-type cell wall beta-glucan metabolic process	gene_02910	0.00461462	0.010748
	GO:0071280	3	1	cellular response to copper ion	gene_02395	0.00461462	0.010748
	GO:0071333	3	1	cellular response to glucose stimulus	gene_07145	0.00461462	0.010748
	GO:0071407	3	1	cellular response to organic cyclic compound	gene_02395	0.00461462	0.010748
	GO:0071471	3	1	cellular response to non-ionic osmotic stress	gene_07298	0.00461462	0.010748
	GO:0071498	3	1	cellular response to fluid shear stress	gene_07298	0.00461462	0.010748
	GO:0090282	3	1	positive regulation of transcription involved in G2/M transition of mitotic cell cycle	gene_02507	0.00461462	0.010748
	GO:0090336	3	1	positive regulation of brown fat cell differentiation	gene_07298	0.00461462	0.010748
	GO:0097720	3	1	calcineurin-mediated signaling	gene_08031	0.00461462	0.010748
	GO:0150077	3	1	regulation of neuroinflammatory response	gene_07298	0.00461462	0.010748
	GO:1902219	3	1	negative regulation of intrinsic apoptotic signaling pathway in response to osmotic stress	gene_07298	0.00461462	0.010748
	GO:1903257	3	1	selenoneine biosynthetic process	gene_08607	0.00461462	0.010748
	GO:1905589	3	1	positive regulation of L-arginine import across plasma membrane	gene_05135	0.00461462	0.010748
	GO:1905949	3	1	negative regulation of calcium ion import across plasma membrane	gene_08031	0.00461462	0.010748
	GO:1990809	3	1	endoplasmic reticulum tubular network membrane organization	gene_06062	0.00461462	0.010748
	GO:0005985	2	2	sucrose metabolic process	gene_07977;gene_05709	0	0
	GO:0043326	2	2	chemotaxis to folate	gene_05669;gene_07387	0	0
	GO:1901482	2	2	L-lysine import into vacuole involved in cellular response to nitrogen starvation	gene_09526;gene_02085	0	0
	GO:1903098	2	2	negative regulation of CENP-A containing nucleosome assembly	gene_02211;gene_05597	0	0
	GO:0000271	2	1	polysaccharide biosynthetic process	gene_06056	0.00157988	0.00483155
	GO:0000436	2	1	carbon catabolite activation of transcription from RNA polymerase II promoter	gene_04975	0.00157988	0.00483155
	GO:0000494	2	1	box C/D snoRNA 3'-end processing	gene_04809	0.00157988	0.00483155
	GO:0001081	2	1	nitrogen catabolite repression of transcription from RNA polymerase II promoter	gene_00783	0.00157988	0.00483155
	GO:0001751	2	1	compound eye photoreceptor cell differentiation	gene_04945	0.00157988	0.00483155
	GO:0006020	2	1	inositol metabolic process	gene_03435	0.00157988	0.00483155
	GO:0006085	2	1	acetyl-CoA biosynthetic process	gene_03208	0.00157988	0.00483155
	GO:0006109	2	1	regulation of carbohydrate metabolic process	gene_10238	0.00157988	0.00483155
	GO:0006542	2	1	glutamine biosynthetic process	gene_09701	0.00157988	0.00483155
	GO:0006553	2	1	lysine metabolic process	gene_03434	0.00157988	0.00483155
	GO:0006739	2	1	NADP metabolic process	gene_03381	0.00157988	0.00483155
	GO:0006798	2	1	polyphosphate catabolic process	gene_06525	0.00157988	0.00483155
	GO:0006971	2	1	hypotonic response	gene_04982	0.00157988	0.00483155
	GO:0007189	2	1	adenylate cyclase-activating G protein-coupled receptor signaling pathway	gene_01012	0.00157988	0.00483155
	GO:0007205	2	1	protein kinase C-activating G protein-coupled receptor signaling pathway	gene_00950	0.00157988	0.00483155
	GO:0007568	2	1	aging	gene_02395	0.00157988	0.00483155
	GO:0007612	2	1	learning	gene_07298	0.00157988	0.00483155
	GO:0009804	2	1	coumarin metabolic process	gene_02395	0.00157988	0.00483155
	GO:0009812	2	1	flavonoid metabolic process	gene_02395	0.00157988	0.00483155
	GO:0009816	2	1	defense response to bacterium, incompatible interaction	gene_06665	0.00157988	0.00483155
	GO:0010041	2	1	response to iron(III) ion	gene_02395	0.00157988	0.00483155
	GO:0010193	2	1	response to ozone	gene_09705	0.00157988	0.00483155
	GO:0010447	2	1	response to acidic pH	gene_02332	0.00157988	0.00483155
	GO:0010575	2	1	positive regulation of vascular endothelial growth factor production	gene_07298	0.00157988	0.00483155
	GO:0010961	2	1	cellular magnesium ion homeostasis	gene_01635	0.00157988	0.00483155
	GO:0014070	2	1	response to organic cyclic compound	gene_02395	0.00157988	0.00483155
	GO:0015729	2	1	oxaloacetate transport	gene_08843	0.00157988	0.00483155
	GO:0017143	2	1	insecticide metabolic process	gene_02395	0.00157988	0.00483155
	GO:0019341	2	1	dibenzo-p-dioxin catabolic process	gene_02395	0.00157988	0.00483155
	GO:0019583	2	1	galactonate metabolic process	gene_06984	0.00157988	0.00483155
	GO:0019676	2	1	ammonia assimilation cycle	gene_05128	0.00157988	0.00483155
	GO:0019730	2	1	antimicrobial humoral response	gene_04945	0.00157988	0.00483155
	GO:0030282	2	1	bone mineralization	gene_07298	0.00157988	0.00483155
	GO:0031115	2	1	negative regulation of microtubule polymerization	gene_02166	0.00157988	0.00483155
	GO:0031494	2	1	regulation of mating type switching	gene_02507	0.00157988	0.00483155
	GO:0031915	2	1	positive regulation of synaptic plasticity	gene_07298	0.00157988	0.00483155
	GO:0032094	2	1	response to food	gene_02395	0.00157988	0.00483155
	GO:0032211	2	1	negative regulation of telomere maintenance via telomerase	gene_04809	0.00157988	0.00483155
	GO:0032878	2	1	regulation of establishment or maintenance of cell polarity	gene_01525	0.00157988	0.00483155
	GO:0032958	2	1	inositol phosphate biosynthetic process	gene_02196	0.00157988	0.00483155
	GO:0033189	2	1	response to vitamin A	gene_02395	0.00157988	0.00483155
	GO:0033211	2	1	adiponectin-activated signaling pathway	gene_01724	0.00157988	0.00483155
	GO:0033260	2	1	nuclear DNA replication	gene_06203	0.00157988	0.00483155
	GO:0034088	2	1	maintenance of mitotic sister chromatid cohesion	gene_04828	0.00157988	0.00483155
	GO:0035977	2	1	protein deglycosylation involved in glycoprotein catabolic process	gene_01070	0.00157988	0.00483155
	GO:0036252	2	1	positive regulation of transcription from RNA polymerase II promoter in response to menadione	gene_00082	0.00157988	0.00483155
	GO:0042268	2	1	regulation of cytolysis	gene_08618	0.00157988	0.00483155
	GO:0042391	2	1	regulation of membrane potential	gene_04939	0.00157988	0.00483155
	GO:0042904	2	1	9-cis-retinoic acid biosynthetic process	gene_02395	0.00157988	0.00483155
	GO:0043010	2	1	camera-type eye development	gene_02395	0.00157988	0.00483155
	GO:0043039	2	1	tRNA aminoacylation	gene_08842	0.00157988	0.00483155
	GO:0043457	2	1	regulation of cellular respiration	gene_04975	0.00157988	0.00483155
	GO:0045214	2	1	sarcomere organization	gene_04945	0.00157988	0.00483155
	GO:0045337	2	1	farnesyl diphosphate biosynthetic process	gene_00937	0.00157988	0.00483155
	GO:0046579	2	1	positive regulation of Ras protein signal transduction	gene_07387	0.00157988	0.00483155
	GO:0048250	2	1	iron import into the mitochondrion	gene_05082	0.00157988	0.00483155
	GO:0050801	2	1	ion homeostasis	gene_10326	0.00157988	0.00483155
	GO:0050896	2	1	response to stimulus	gene_07387	0.00157988	0.00483155
	GO:0051220	2	1	cytoplasmic sequestering of protein	gene_10390	0.00157988	0.00483155
	GO:0052707	2	1	N-alpha,N-alpha,N-alpha-trimethyl-L-histidine biosynthesis from histidine	gene_08607	0.00157988	0.00483155
	GO:0055093	2	1	response to hyperoxia	gene_02395	0.00157988	0.00483155
	GO:0060137	2	1	maternal process involved in parturition	gene_02395	0.00157988	0.00483155
	GO:0060361	2	1	flight	gene_04945	0.00157988	0.00483155
	GO:0061161	2	1	positive regulation of establishment of bipolar cell polarity regulating cell shape	gene_05018	0.00157988	0.00483155
	GO:0061400	2	1	positive regulation of transcription from RNA polymerase II promoter in response to calcium ion	gene_10326	0.00157988	0.00483155
	GO:0061423	2	1	positive regulation of sodium ion transport by positive regulation of transcription from RNA polymerase II promoter	gene_10326	0.00157988	0.00483155
	GO:0070126	2	1	mitochondrial translational termination	gene_03677	0.00157988	0.00483155
	GO:0070365	2	1	hepatocyte differentiation	gene_02395	0.00157988	0.00483155
	GO:0070791	2	1	cleistothecium development	gene_05969	0.00157988	0.00483155
	GO:0070898	2	1	RNA polymerase III preinitiation complex assembly	gene_01618	0.00157988	0.00483155
	GO:0071422	2	1	succinate transmembrane transport	gene_08843	0.00157988	0.00483155
	GO:0071423	2	1	malate transmembrane transport	gene_08843	0.00157988	0.00483155
	GO:0071474	2	1	cellular hyperosmotic response	gene_05038	0.00157988	0.00483155
	GO:0071483	2	1	cellular response to blue light	gene_10326	0.00157988	0.00483155
	GO:0071500	2	1	cellular response to nitrosative stress	gene_07145	0.00157988	0.00483155
	GO:0071630	2	1	nuclear protein quality control by the ubiquitin-proteasome system	gene_03906	0.00157988	0.00483155
	GO:0090210	2	1	regulation of establishment of blood-brain barrier	gene_04945	0.00157988	0.00483155
	GO:0090513	2	1	L-histidine transmembrane import into vacuole	gene_09526	0.00157988	0.00483155
	GO:0090517	2	1	L-lysine transmembrane import into vacuole	gene_09526	0.00157988	0.00483155
	GO:0090518	2	1	L-arginine transmembrane import into vacuole	gene_09526	0.00157988	0.00483155
	GO:0097301	2	1	regulation of potassium ion concentration by positive regulation of transcription from RNA polymerase II promoter	gene_10326	0.00157988	0.00483155
	GO:0099606	2	1	microtubule plus-end directed mitotic chromosome migration	gene_06055	0.00157988	0.00483155
	GO:1900471	2	1	negative regulation of inositol biosynthetic process by negative regulation of transcription from RNA polymerase II promoter	gene_00783	0.00157988	0.00483155
	GO:1900472	2	1	positive regulation of phosphatidylcholine biosynthetic process by positive regulation of transcription from RNA polymerase II promoter	gene_00783	0.00157988	0.00483155
	GO:1900525	2	1	positive regulation of phosphatidylserine biosynthetic process by positive regulation of transcription from RNA polymerase II promoter	gene_00783	0.00157988	0.00483155
	GO:1900622	2	1	positive regulation of transcription from RNA polymerase II promoter by calcium-mediated signaling	gene_10326	0.00157988	0.00483155
	GO:1903147	2	1	negative regulation of autophagy of mitochondrion	gene_04945	0.00157988	0.00483155
	GO:1903253	2	1	hercynylcysteine sulfoxide biosynthetic process	gene_08607	0.00157988	0.00483155
	GO:1903255	2	1	hercynylselenocysteine biosynthetic process	gene_08607	0.00157988	0.00483155
	GO:1905534	2	1	positive regulation of leucine import across plasma membrane	gene_05135	0.00157988	0.00483155
	GO:1905758	2	1	positive regulation of primary cell septum biogenesis	gene_02330	0.00157988	0.00483155
	GO:1990591	2	1	asparagine transmembrane import into vacuole	gene_02085	0.00157988	0.00483155
	GO:1990896	2	1	protein localization to cell cortex of cell tip	gene_02166	0.00157988	0.00483155
	GO:2001040	2	1	positive regulation of cellular response to drug	gene_10326	0.00157988	0.00483155
	GO:2001216	2	1	negative regulation of hydroxymethylglutaryl-CoA reductase (NADPH) activity	gene_06119	0.00157988	0.00483155
	GO:0000161	1	1	osmosensory signaling MAPK cascade	gene_07348	0	0
	GO:0000188	1	1	inactivation of MAPK activity	gene_06203	0	0
	GO:0000719	1	1	photoreactive repair	gene_02274	0	0
	GO:0000819	1	1	sister chromatid segregation	gene_00055	0	0
	GO:0001111	1	1	promoter clearance from RNA polymerase II promoter	gene_07383	0	0
	GO:0001195	1	1	maintenance of transcriptional fidelity during DNA-templated transcription elongation from RNA polymerase III promoter	gene_01618	0	0
	GO:0001197	1	1	positive regulation of mating-type specific transcription from RNA polymerase II promoter	gene_02507	0	0
	GO:0001198	1	1	negative regulation of mating-type specific transcription from RNA polymerase II promoter	gene_02507	0	0
	GO:0006058	1	1	mannoprotein catabolic process	gene_01070	0	0
	GO:0006065	1	1	UDP-glucuronate biosynthetic process	gene_03010	0	0
	GO:0006152	1	1	purine nucleoside catabolic process	gene_04397	0	0
	GO:0006171	1	1	cAMP biosynthetic process	gene_06473	0	0
	GO:0006216	1	1	cytidine catabolic process	gene_04397	0	0
	GO:0006218	1	1	uridine catabolic process	gene_04397	0	0
	GO:0006693	1	1	prostaglandin metabolic process	gene_07298	0	0
	GO:0007566	1	1	embryo implantation	gene_07298	0	0
	GO:0009190	1	1	cyclic nucleotide biosynthetic process	gene_06473	0	0
	GO:0009443	1	1	pyridoxal 5'-phosphate salvage	gene_00462	0	0
	GO:0009757	1	1	hexose mediated signaling	gene_01012	0	0
	GO:0010363	1	1	regulation of plant-type hypersensitive response	gene_06665	0	0
	GO:0010895	1	1	negative regulation of ergosterol biosynthetic process	gene_06119	0	0
	GO:0010942	1	1	positive regulation of cell death	gene_07298	0	0
	GO:0015671	1	1	oxygen transport	gene_07145	0	0
	GO:0015709	1	1	thiosulfate transport	gene_08843	0	0
	GO:0015909	1	1	long-chain fatty acid transport	gene_10084	0	0
	GO:0019233	1	1	sensory perception of pain	gene_07298	0	0
	GO:0030328	1	1	prenylcysteine catabolic process	gene_00662	0	0
	GO:0030728	1	1	ovulation	gene_07298	0	0
	GO:0031063	1	1	regulation of histone deacetylation	gene_10243	0	0
	GO:0031065	1	1	positive regulation of histone deacetylation	gene_10390	0	0
	GO:0031107	1	1	septin ring disassembly	gene_04888	0	0
	GO:0031152	1	1	aggregation involved in sorocarp development	gene_07387	0	0
	GO:0032227	1	1	negative regulation of synaptic transmission, dopaminergic	gene_07298	0	0
	GO:0032463	1	1	negative regulation of protein homooligomerization	gene_02330	0	0
	GO:0032975	1	1	amino acid transmembrane import into vacuole	gene_09526	0	0
	GO:0033047	1	1	regulation of mitotic sister chromatid segregation	gene_05474	0	0
	GO:0035633	1	1	maintenance of permeability of blood-brain barrier	gene_07298	0	0
	GO:0036001	1	1	'de novo' pyridoxal 5'-phosphate biosynthetic process	gene_08802	0	0
	GO:0036149	1	1	phosphatidylinositol acyl-chain remodeling	gene_02954	0	0
	GO:0042331	1	1	phototaxis	gene_05669	0	0
	GO:0042640	1	1	anagen	gene_07298	0	0
	GO:0042819	1	1	vitamin B6 biosynthetic process	gene_08802	0	0
	GO:0043052	1	1	thermotaxis	gene_05669	0	0
	GO:0043327	1	1	chemotaxis to cAMP	gene_07387	0	0
	GO:0043406	1	1	positive regulation of MAP kinase activity	gene_00144	0	0
	GO:0044774	1	1	mitotic DNA integrity checkpoint	gene_00055	0	0
	GO:0044820	1	1	mitotic telomere tethering at nuclear periphery	gene_04828	0	0
	GO:0045429	1	1	positive regulation of nitric oxide biosynthetic process	gene_07298	0	0
	GO:0045719	1	1	negative regulation of glycogen biosynthetic process	gene_01525	0	0
	GO:0045786	1	1	negative regulation of cell cycle	gene_07298	0	0
	GO:0045907	1	1	positive regulation of vasoconstriction	gene_07298	0	0
	GO:0045986	1	1	negative regulation of smooth muscle contraction	gene_07298	0	0
	GO:0045987	1	1	positive regulation of smooth muscle contraction	gene_07298	0	0
	GO:0046135	1	1	pyrimidine nucleoside catabolic process	gene_04397	0	0
	GO:0046210	1	1	nitric oxide catabolic process	gene_07145	0	0
	GO:0046321	1	1	positive regulation of fatty acid oxidation	gene_01724	0	0
	GO:0046697	1	1	decidualization	gene_07298	0	0
	GO:0046949	1	1	fatty-acyl-CoA biosynthetic process	gene_00719	0	0
	GO:0050873	1	1	brown fat cell differentiation	gene_07298	0	0
	GO:0051409	1	1	response to nitrosative stress	gene_07145	0	0
	GO:0051926	1	1	negative regulation of calcium ion transport	gene_07298	0	0
	GO:0051968	1	1	positive regulation of synaptic transmission, glutamatergic	gene_07298	0	0
	GO:0060917	1	1	regulation of (1->6)-beta-D-glucan biosynthetic process	gene_01525	0	0
	GO:0061167	1	1	maintenance of endoplasmic reticulum location involved in endoplasmic reticulum polarization at cell division site	gene_02330	0	0
	GO:0061393	1	1	positive regulation of transcription from RNA polymerase II promoter in response to osmotic stress	gene_01158	0	0
	GO:0061395	1	1	positive regulation of transcription from RNA polymerase II promoter in response to arsenic-containing substance	gene_08179	0	0
	GO:0061401	1	1	positive regulation of transcription from RNA polymerase II promoter in response to a hypotonic environment	gene_08179	0	0
	GO:0061403	1	1	positive regulation of transcription from RNA polymerase II promoter in response to nitrosative stress	gene_08179	0	0
	GO:0061405	1	1	positive regulation of transcription from RNA polymerase II promoter in response to hydrostatic pressure	gene_08179	0	0
	GO:0061407	1	1	positive regulation of transcription from RNA polymerase II promoter in response to hydrogen peroxide	gene_08179	0	0
	GO:0061409	1	1	positive regulation of transcription from RNA polymerase II promoter in response to freezing	gene_08179	0	0
	GO:0061410	1	1	positive regulation of transcription from RNA polymerase II promoter in response to ethanol	gene_08179	0	0
	GO:0061411	1	1	positive regulation of transcription from RNA polymerase II promoter in response to cold	gene_08179	0	0
	GO:0061412	1	1	positive regulation of transcription from RNA polymerase II promoter in response to amino acid starvation	gene_08179	0	0
	GO:0061434	1	1	regulation of replicative cell aging by regulation of transcription from RNA polymerase II promoter in response to caloric restriction	gene_08179	0	0
	GO:0061572	1	1	actin filament bundle organization	gene_05018	0	0
	GO:0061817	1	1	endoplasmic reticulum-plasma membrane tethering	gene_08353	0	0
	GO:0070156	1	1	mitochondrial phenylalanyl-tRNA aminoacylation	gene_08842	0	0
	GO:0070884	1	1	regulation of calcineurin-NFAT signaling cascade	gene_08841	0	0
	GO:0070994	1	1	detection of oxidative stress	gene_03157	0	0
	GO:0071636	1	1	positive regulation of transforming growth factor beta production	gene_07298	0	0
	GO:0071789	1	1	spindle pole body localization to nuclear envelope	gene_06062	0	0
	GO:0071966	1	1	fungal-type cell wall polysaccharide metabolic process	gene_03066	0	0
	GO:0071998	1	1	ascospore release from ascus	gene_04834	0	0
	GO:0090050	1	1	positive regulation of cell migration involved in sprouting angiogenesis	gene_07298	0	0
	GO:0090271	1	1	positive regulation of fibroblast growth factor production	gene_07298	0	0
	GO:0090362	1	1	positive regulation of platelet-derived growth factor production	gene_07298	0	0
	GO:0090514	1	1	L-tyrosine transmembrane import into vacuole	gene_09526	0	0
	GO:0090515	1	1	L-glutamate transmembrane import into vacuole	gene_09526	0	0
	GO:0090516	1	1	L-serine transmembrane import into vacuole	gene_09526	0	0
	GO:0097236	1	1	positive regulation of transcription from RNA polymerase II promoter in response to zinc ion starvation	gene_08179	0	0
	GO:0097756	1	1	negative regulation of blood vessel diameter	gene_07298	0	0
	GO:0098704	1	1	carbohydrate import across plasma membrane	gene_01410	0	0
	GO:0098708	1	1	glucose import across plasma membrane	gene_01410	0	0
	GO:0106011	1	1	regulation of protein localization to medial cortex	gene_02330	0	0
	GO:1900444	1	1	negative regulation of filamentous growth of a population of unicellular organisms in response to biotic stimulus	gene_02332	0	0
	GO:1900465	1	1	negative regulation of arginine catabolic process by negative regulation of transcription from RNA polymerase II promoter	gene_02507	0	0
	GO:1900466	1	1	positive regulation of arginine biosynthetic process by positive regulation of transcription from RNA polymerase II promoter	gene_02507	0	0
	GO:1901481	1	1	L-glutamate import involved in cellular response to nitrogen starvation	gene_09526	0	0
	GO:1902356	1	1	oxaloacetate(2-) transmembrane transport	gene_08843	0	0
	GO:1902610	1	1	response to N-phenylthiourea	gene_07387	0	0
	GO:1902749	1	1	regulation of cell cycle G2/M phase transition	gene_00144	0	0
	GO:1902817	1	1	negative regulation of protein localization to microtubule	gene_02330	0	0
	GO:1902846	1	1	positive regulation of mitotic spindle elongation	gene_02330	0	0
	GO:1902854	1	1	positive regulation of nuclear migration during mitotic telophase	gene_02330	0	0
	GO:1903026	1	1	negative regulation of RNA polymerase II regulatory region sequence-specific DNA binding	gene_10390	0	0
	GO:1903665	1	1	negative regulation of asexual reproduction	gene_07387	0	0
	GO:1903714	1	1	isoleucine transmembrane transport	gene_02085	0	0
	GO:1903830	1	1	magnesium ion transmembrane transport	gene_01635	0	0
	GO:1904758	1	1	protein localization to new growing cell tip	gene_02166	0	0
	GO:1905301	1	1	regulation of macropinocytosis	gene_07387	0	0
	GO:1905342	1	1	positive regulation of protein localization to kinetochore	gene_05474	0	0
	GO:1905783	1	1	CENP-A containing nucleosome disassembly	gene_05597	0	0
	GO:1990522	1	1	tail spike morphogenesis	gene_01724	0	0
	GO:1990539	1	1	fructose import across plasma membrane	gene_01410	0	0
	GO:2000250	1	1	negative regulation of actin cytoskeleton reorganization	gene_02330	0	0
	GO:2000678	1	1	negative regulation of transcription regulatory region DNA binding	gene_10390	0	0
	GO:2000771	1	1	positive regulation of establishment or maintenance of cell polarity regulating cell shape	gene_02166	0	0
Cellular Component	GO:0005575	3016	134	cellular_component	gene_00662;gene_08833;gene_10465;gene_09970;gene_02607;gene_04634;gene_08917;gene_00950;gene_04640;gene_03867;gene_01778;gene_06850;gene_06769;gene_05931;gene_08086;gene_03536;gene_06261;gene_02448;gene_04993;gene_03390;gene_02300;gene_04039;gene_00754;gene_01744;gene_05624;gene_06585;gene_07297;gene_07446;gene_06979;gene_08045;gene_02196;gene_09605;gene_09492;gene_08959;gene_00115;gene_08364;gen…	0.0454406	0.0655771
	GO:0005634	1441	65	nucleus	gene_07191;gene_02211;gene_10775;gene_09705;gene_05128;gene_00962;gene_08607;gene_10243;gene_09229;gene_05089;gene_01070;gene_10084;gene_00082;gene_03208;gene_01712;gene_09216;gene_09794;gene_09771;gene_01494;gene_01158;gene_04945;gene_07383;gene_06073;gene_03565;gene_00946;gene_05964;gene_01716;gene_04809;gene_09743;gene_10512;gene_06040;gene_00783;gene_01030;gene_10326;gene_07977;gene_05709;gen…	0.114381	0.142204
	GO:0005737	982	42	cytoplasm	gene_07191;gene_05128;gene_10403;gene_08842;gene_10084;gene_08802;gene_00082;gene_02395;gene_09794;gene_01666;gene_01158;gene_01993;gene_04945;gene_03381;gene_04888;gene_01525;gene_07348;gene_02272;gene_10326;gene_02954;gene_10390;gene_00607;gene_08618;gene_04397;gene_08031;gene_01823;gene_07298;gene_04465;gene_09599;gene_03435;gene_06665;gene_05194;gene_03010;gene_07145;gene_08179;gene_06997;gen…	0.27202	0.300912
	GO:0016021	851	27	integral component of membrane	gene_04794;gene_05579;gene_03804;gene_06062;gene_01015;gene_05038;gene_02625;gene_04616;gene_09550;gene_07392;gene_00281;gene_04225;gene_02085;gene_05082;gene_03071;gene_02954;gene_05534;gene_06561;gene_04939;gene_05194;gene_08843;gene_03159;gene_00144;gene_01724;gene_02774;gene_05960;gene_08514	0.883461	0.88748
	GO:0005829	780	39	cytosol	gene_05128;gene_08607;gene_10243;gene_10084;gene_00082;gene_03208;gene_09794;gene_01666;gene_03236;gene_01993;gene_04945;gene_03381;gene_06473;gene_04888;gene_01716;gene_08979;gene_01012;gene_08566;gene_00023;gene_10390;gene_08618;gene_04397;gene_08031;gene_01823;gene_03435;gene_05194;gene_03010;gene_08179;gene_06997;gene_06938;gene_07387;gene_01737;gene_05474;gene_06525;gene_02507;gene_04615;gen…	0.055461	0.077505
	GO:0016020	512	19	membrane	gene_03804;gene_05571;gene_01015;gene_10084;gene_03119;gene_08838;gene_09639;gene_00850;gene_01012;gene_05669;gene_03071;gene_06561;gene_07298;gene_04939;gene_05194;gene_08843;gene_07387;gene_00144;gene_01724	0.569616	0.590475
	GO:0005739	511	17	mitochondrion	gene_01544;gene_08842;gene_02395;gene_08838;gene_03381;gene_06473;gene_09598;gene_01716;gene_01012;gene_05082;gene_00607;gene_03677;gene_09964;gene_00921;gene_08843;gene_04667;gene_00462	0.741009	0.749152
	GO:0005886	417	25	plasma membrane	gene_07682;gene_05571;gene_10084;gene_08838;gene_05018;gene_04436;gene_00850;gene_06473;gene_09550;gene_08829;gene_08353;gene_01012;gene_00281;gene_10391;gene_05669;gene_07080;gene_07058;gene_05534;gene_04939;gene_07387;gene_01724;gene_01737;gene_02774;gene_02547;gene_01410	0.015037	0.0264765
	GO:0005783	303	12	endoplasmic reticulum	gene_06062;gene_05571;gene_09688;gene_04616;gene_07080;gene_07058;gene_03071;gene_02954;gene_00607;gene_07298;gene_05194;gene_07880	0.43124	0.456899
	GO:0005576	227	8	extracellular region	gene_02910;gene_03812;gene_09688;gene_08838;gene_01993;gene_04860;gene_08618;gene_01235	0.553782	0.575683
	GO:0005794	172	10	Golgi apparatus	gene_07682;gene_04616;gene_08353;gene_03066;gene_07080;gene_07058;gene_05274;gene_09336;gene_08514;gene_01410	0.0815303	0.105397
	GO:0005730	145	1	nucleolus	gene_04809	0.981326	0.982216
	GO:0000790	142	11	nuclear chromatin	gene_02211;gene_05338;gene_00082;gene_01494;gene_03906;gene_05964;gene_04828;gene_05597;gene_00055;gene_02507;gene_01618	0.0109058	0.021272
	GO:0005789	135	5	endoplasmic reticulum membrane	gene_02395;gene_06473;gene_04616;gene_03071;gene_08514	0.451166	0.474821
	GO:0000324	128	3	fungal-type vacuole	gene_01015;gene_09688;gene_01993	0.756072	0.762983
	GO:0000329	119	6	fungal-type vacuole membrane	gene_09526;gene_02085;gene_01635;gene_03257;gene_06525;gene_10238	0.195542	0.225343
	GO:0032153	111	6	cell division site	gene_06062;gene_04888;gene_10391;gene_08031;gene_02166;gene_02547	0.153215	0.181881
	GO:0005743	99	7	mitochondrial inner membrane	gene_04794;gene_00720;gene_02395;gene_05082;gene_03677;gene_08843;gene_02774	0.0431502	0.0624348
	GO:0005759	88	2	mitochondrial matrix	gene_08842;gene_06664	0.686851	0.702055
	GO:0005768	87	2	endosome	gene_05274;gene_05194	0.679348	0.695089
	GO:0005887	71	4	integral component of plasma membrane	gene_04225;gene_04939;gene_02547;gene_01410	0.151789	0.180443
	GO:0005622	67	4	intracellular	gene_00850;gene_02381;gene_04987;gene_01978	0.127383	0.155738
	GO:0009986	62	3	cell surface	gene_02910;gene_05018;gene_00850	0.232787	0.260646
	GO:0005654	62	2	nucleoplasm	gene_08523;gene_04809	0.450845	0.474821
	GO:0005777	61	2	peroxisome	gene_09705;gene_07392	0.440293	0.465152
	GO:0005635	60	4	nuclear envelope	gene_06062;gene_09688;gene_03906;gene_06055	0.0895632	0.115108
	GO:0071944	59	1	cell periphery	gene_04939	0.687428	0.702055
	GO:0031410	55	2	cytoplasmic vesicle	gene_10406;gene_08353	0.375589	0.401793
	GO:0009277	53	4	fungal-type cell wall	gene_02910;gene_09688;gene_08838;gene_03066	0.0586344	0.0797197
	GO:0051286	53	4	cell tip	gene_08353;gene_10391;gene_02166;gene_02547	0.0586344	0.0797197
	GO:0005758	49	1	mitochondrial intermembrane space	gene_00462	0.586583	0.604657
	GO:0030479	48	4	actin cortical patch	gene_01375;gene_02332;gene_10391;gene_02272	0.0409881	0.0594624
	GO:0044732	48	2	mitotic spindle pole body	gene_02330;gene_06055	0.29854	0.325359
	GO:0034399	46	2	nuclear periphery	gene_08838;gene_03906	0.276593	0.305247
	GO:0005935	45	3	cellular bud neck	gene_09688;gene_05018;gene_08618	0.102793	0.1294
	GO:0009536	36	2	plastid	gene_09705;gene_03613	0.171317	0.200993
	GO:0005856	36	1	cytoskeleton	gene_00607	0.42283	0.448419
	GO:0005938	35	2	cell cortex	gene_07392;gene_04225	0.161489	0.189866
	GO:0005643	35	1	nuclear pore	gene_06062	0.408857	0.434854
	GO:0009507	35	1	chloroplast	gene_09598	0.408857	0.434854
	GO:0010494	34	3	cytoplasmic stress granule	gene_01824;gene_04982;gene_06997	0.044674	0.0645551
	GO:0031225	34	2	anchored component of membrane	gene_05571;gene_08838	0.15184	0.180443
	GO:0005811	29	2	lipid droplet	gene_10084;gene_05669	0.106767	0.132887
	GO:0043231	29	2	intracellular membrane-bounded organelle	gene_02395;gene_07298	0.106767	0.132887
	GO:0005628	29	1	prospore membrane	gene_03240	0.322021	0.347858
	GO:0005618	28	2	cell wall	gene_09688;gene_08838	0.0984822	0.124256
	GO:0005874	27	2	microtubule	gene_06102;gene_00607	0.0904724	0.115872
	GO:0005813	27	1	centrosome	gene_06102	0.292269	0.318839
	GO:0005871	27	1	kinesin complex	gene_00607	0.292269	0.318839
	GO:0005934	27	1	cellular bud tip	gene_08618	0.292269	0.318839
	GO:0051285	26	2	cell cortex of cell tip	gene_04436;gene_02166	0.0827504	0.1066
	GO:0000932	25	1	P-body	gene_06997	0.262354	0.29051
	GO:0031618	24	1	nuclear pericentric heterochromatin	gene_04828	0.247392	0.275046
	GO:0000778	23	1	condensed nuclear chromosome kinetochore	gene_06055	0.232461	0.260545
	GO:0005802	23	1	trans-Golgi network	gene_05194	0.232461	0.260545
	GO:0045121	23	1	membrane raft	gene_08838	0.232461	0.260545
	GO:0072686	23	1	mitotic spindle	gene_06055	0.232461	0.260545
	GO:0005826	22	1	actomyosin contractile ring	gene_08031	0.217589	0.245371
	GO:0046658	21	1	anchored component of plasma membrane	gene_05571	0.202807	0.231062
	GO:0005933	20	2	cellular bud	gene_05571;gene_02332	0.043128	0.0624348
	GO:0010008	20	1	endosome membrane	gene_05194	0.188147	0.217047
	GO:0031965	20	1	nuclear membrane	gene_06062	0.188147	0.217047
	GO:0032991	20	1	protein-containing complex	gene_07298	0.188147	0.217047
	GO:0016592	19	2	mediator complex	gene_07383;gene_01995	0.0377389	0.0548208
	GO:0030173	19	2	integral component of Golgi membrane	gene_04666;gene_09336	0.0377389	0.0548208
	GO:0000151	19	1	ubiquitin ligase complex	gene_03792	0.173645	0.20222
	GO:0005694	19	1	chromosome	gene_01618	0.173645	0.20222
	GO:0030134	18	3	COPII-coated ER to Golgi transport vesicle	gene_08838;gene_05534;gene_08514	0.00484211	0.0112304
	GO:0000935	18	1	division septum	gene_02166	0.159339	0.187738
	GO:0030428	18	1	cell septum	gene_04982	0.159339	0.187738
	GO:0000124	17	1	SAGA complex	gene_08051	0.14527	0.173008
	GO:0000776	17	1	kinetochore	gene_06055	0.14527	0.173008
	GO:0031011	16	2	Ino80 complex	gene_02211;gene_07383	0.0238044	0.0385338
	GO:0005669	16	1	transcription factor TFIID complex	gene_07383	0.131482	0.159513
	GO:0019898	16	1	extrinsic component of membrane	gene_03240	0.131482	0.159513
	GO:0000228	15	2	nuclear chromosome	gene_00946;gene_04615	0.0199161	0.034463
	GO:0031097	15	2	medial cortex	gene_04888;gene_02330	0.0199161	0.034463
	GO:0015630	15	1	microtubule cytoskeleton	gene_02166	0.118023	0.144614
	GO:0016282	14	1	eukaryotic 43S preinitiation complex	gene_01824	0.104942	0.131058
	GO:0030427	13	1	site of polarized growth	gene_10391	0.092294	0.116849
	GO:0031201	13	1	SNARE complex	gene_08514	0.092294	0.116849
	GO:1990707	13	1	nuclear subtelomeric heterochromatin	gene_04828	0.092294	0.116849
	GO:0000812	12	2	Swr1 complex	gene_02211;gene_10243	0.0105185	0.0205529
	GO:0043005	12	1	neuron projection	gene_07298	0.0801375	0.103718
	GO:0000922	11	1	spindle pole	gene_06102	0.0685343	0.0910492
	GO:0005656	11	1	nuclear pre-replicative complex	gene_08523	0.0685343	0.0910492
	GO:0005816	11	1	spindle pole body	gene_02330	0.0685343	0.0910492
	GO:0005852	11	1	eukaryotic translation initiation factor 3 complex	gene_01824	0.0685343	0.0910492
	GO:0032541	10	1	cortical endoplasmic reticulum	gene_06062	0.0575509	0.0785224
	GO:0001411	9	2	hyphal tip	gene_05018;gene_01978	0.00438926	0.010748
	GO:0035838	9	2	growing cell tip	gene_02166;gene_02547	0.00438926	0.010748
	GO:0045335	9	2	phagocytic vesicle	gene_07145;gene_07387	0.00438926	0.010748
	GO:0070210	9	2	Rpd3L-Expanded complex	gene_00783;gene_02916	0.00438926	0.010748
	GO:0120105	9	2	actomyosin contractile ring, intermediate layer	gene_08031;gene_02330	0.00438926	0.010748
	GO:0005884	9	1	actin filament	gene_10391	0.0472581	0.0663778
	GO:0071627	9	1	integral component of fungal-type vacuolar membrane	gene_09526	0.0472581	0.0663778
	GO:0030445	8	1	yeast-form cell wall	gene_00850	0.0377317	0.0548208
	GO:0031932	8	1	TORC2 complex	gene_06938	0.0377317	0.0548208
	GO:0071540	8	1	eukaryotic translation initiation factor 3 complex, eIF3e	gene_01824	0.0377317	0.0548208
	GO:0033573	7	2	high-affinity iron permease complex	gene_07080;gene_07058	0.00194104	0.00587098
	GO:1990816	7	2	vacuole-mitochondrion membrane contact site	gene_03240;gene_01635	0.00194104	0.00587098
	GO:0000923	7	1	equatorial microtubule organizing center	gene_06102	0.0290524	0.0443622
	GO:0005720	7	1	nuclear heterochromatin	gene_08523	0.0290524	0.0443622
	GO:0005740	7	1	mitochondrial envelope	gene_08843	0.0290524	0.0443622
	GO:0005940	7	1	septin ring	gene_04888	0.0290524	0.0443622
	GO:0008180	7	1	COP9 signalosome	gene_03929	0.0290524	0.0443622
	GO:0016514	7	1	SWI/SNF complex	gene_07383	0.0290524	0.0443622
	GO:0035327	7	1	transcriptionally active chromatin	gene_00055	0.0290524	0.0443622
	GO:0071541	7	1	eukaryotic translation initiation factor 3 complex, eIF3m	gene_01824	0.0290524	0.0443622
	GO:0071561	7	1	nucleus-vacuole junction	gene_03240	0.0290524	0.0443622
	GO:1902377	7	1	nuclear rDNA heterochromatin	gene_04828	0.0290524	0.0443622
	GO:0035839	6	2	non-growing cell tip	gene_02166;gene_02547	0.00114278	0.00483155
	GO:0035840	6	2	old growing cell tip	gene_02166;gene_02547	0.00114278	0.00483155
	GO:0000502	6	1	proteasome complex	gene_03929	0.0213063	0.0347447
	GO:0000780	6	1	condensed nuclear chromosome, centromeric region	gene_04828	0.0213063	0.0347447
	GO:0000930	6	1	gamma-tubulin complex	gene_06102	0.0213063	0.0347447
	GO:0030018	6	1	Z disc	gene_04945	0.0213063	0.0347447
	GO:0032221	6	1	Rpd3S complex	gene_02916	0.0213063	0.0347447
	GO:0033698	6	1	Rpd3L complex	gene_00783	0.0213063	0.0347447
	GO:0005834	5	2	heterotrimeric G-protein complex	gene_01012;gene_07387	0.000588742	0.00318613
	GO:0000788	5	1	nuclear nucleosome	gene_02211	0.0145851	0.0257632
	GO:0005851	5	1	eukaryotic translation initiation factor 2B complex	gene_08044	0.0145851	0.0257632
	GO:0016593	5	1	Cdc73/Paf1 complex	gene_04827	0.0145851	0.0257632
	GO:0031227	5	1	intrinsic component of endoplasmic reticulum membrane	gene_06474	0.0145851	0.0257632
	GO:0032588	5	1	trans-Golgi network membrane	gene_05194	0.0145851	0.0257632
	GO:0005621	4	2	cellular bud scar	gene_08838;gene_05018	0.000242663	0.0013599
	GO:0000164	4	1	protein phosphatase type 1 complex	gene_10238	0.00898657	0.0177799
	GO:0005798	4	1	Golgi-associated vesicle	gene_06561	0.00898657	0.0177799
	GO:0005845	4	1	mRNA cap binding complex	gene_06997	0.00898657	0.0177799
	GO:0030121	4	1	AP-1 adaptor complex	gene_05274	0.00898657	0.0177799
	GO:0030864	4	1	cortical actin cytoskeleton	gene_10391	0.00898657	0.0177799
	GO:0030892	4	1	mitotic cohesin complex	gene_04828	0.00898657	0.0177799
	GO:0031430	4	1	M band	gene_04945	0.00898657	0.0177799
	GO:0031982	4	1	vesicle	gene_07387	0.00898657	0.0177799
	GO:0032045	4	1	guanyl-nucleotide exchange factor complex	gene_08044	0.00898657	0.0177799
	GO:0032592	4	1	integral component of mitochondrial membrane	gene_00720	0.00898657	0.0177799
	GO:0034506	4	1	chromosome, centromeric core domain	gene_00055	0.00898657	0.0177799
	GO:0034990	4	1	nuclear mitotic cohesin complex	gene_04828	0.00898657	0.0177799
	GO:0055037	4	1	recycling endosome	gene_06102	0.00898657	0.0177799
	GO:0016602	3	2	CCAAT-binding factor complex	gene_06818;gene_04975	6.25155e-05	0.000363248
	GO:0000818	3	1	nuclear MIS12/MIND complex	gene_01764	0.00461462	0.010748
	GO:0000936	3	1	primary cell septum	gene_08838	0.00461462	0.010748
	GO:0005674	3	1	transcription factor TFIIF complex	gene_07383	0.00461462	0.010748
	GO:0005901	3	1	caveola	gene_07298	0.00461462	0.010748
	GO:0005955	3	1	calcineurin complex	gene_08031	0.00461462	0.010748
	GO:0010339	3	1	external side of cell wall	gene_03066	0.00461462	0.010748
	GO:0033100	3	1	NuA3 histone acetyltransferase complex	gene_07383	0.00461462	0.010748
	GO:0071782	3	1	endoplasmic reticulum tubular network	gene_06062	0.00461462	0.010748
	GO:0090575	3	1	RNA polymerase II transcription factor complex	gene_00082	0.00461462	0.010748
	GO:0099070	3	1	static microtubule bundle	gene_02166	0.00461462	0.010748
	GO:0110092	3	1	nucleus leading edge	gene_04828	0.00461462	0.010748
	GO:1904511	3	1	cytoplasmic microtubule plus-end	gene_02166	0.00461462	0.010748
	GO:1990130	3	1	GATOR1 complex	gene_00762	0.00461462	0.010748
	GO:1990468	3	1	NuA3b histone acetyltransferase complex	gene_07383	0.00461462	0.010748
	GO:0000445	2	1	THO complex part of transcription export complex	gene_04615	0.00157988	0.00483155
	GO:0017053	2	1	transcriptional repressor complex	gene_05964	0.00157988	0.00483155
	GO:0031500	2	1	Tea1 cell-end complex	gene_02166	0.00157988	0.00483155
	GO:0032168	2	1	hyphal septin ring	gene_04888	0.00157988	0.00483155
	GO:0033596	2	1	TSC1-TSC2 complex	gene_05135	0.00157988	0.00483155
	GO:0034973	2	1	Sid2-Mob1 complex	gene_02330	0.00157988	0.00483155
	GO:0090568	2	1	nuclear transcriptional repressor complex	gene_05964	0.00157988	0.00483155
	GO:0097344	2	1	Rix1 complex	gene_08523	0.00157988	0.00483155
	GO:0099079	2	1	actin body	gene_10391	0.00157988	0.00483155
	GO:1903600	2	1	glutaminase complex	gene_08802	0.00157988	0.00483155
	GO:1904834	2	1	nuclear CENP-A containing chromatin	gene_05597	0.00157988	0.00483155
	GO:1990467	2	1	NuA3a histone acetyltransferase complex	gene_07383	0.00157988	0.00483155
	GO:1990483	2	1	Clr6 histone deacetylase complex I''	gene_02916	0.00157988	0.00483155
	GO:1990752	2	1	microtubule end	gene_02166	0.00157988	0.00483155
	GO:0009365	1	1	protein histidine kinase complex	gene_03157	0	0
	GO:0034507	1	1	chromosome, centromeric outer repeat region	gene_04828	0	0
	GO:0044232	1	1	organelle membrane contact site	gene_03240	0	0
	GO:0097221	1	1	M/G1 phase-specific MADS box-forkhead transcription factor complex	gene_01494	0	0
	GO:0098745	1	1	Dcp1-Dcp2 complex	gene_06997	0	0
	GO:1902929	1	1	plasma membrane of growing cell tip	gene_05018	0	0
Molecular Function	GO:0003674	2499	114	molecular_function	gene_04794;gene_08833;gene_10465;gene_09970;gene_05579;gene_04640;gene_03867;gene_06062;gene_01778;gene_06850;gene_05571;gene_05931;gene_08086;gene_03536;gene_02448;gene_03390;gene_02300;gene_01744;gene_01375;gene_05624;gene_06585;gene_07297;gene_07446;gene_06979;gene_05018;gene_09639;gene_02706;gene_04827;gene_01451;gene_00396;gene_04436;gene_05326;gene_08958;gene_09452;gene_00837;gene_01064;gen…	0.0333864	0.0507695
	GO:0005524	668	23	ATP binding	gene_07191;gene_09705;gene_04993;gene_01015;gene_08842;gene_05038;gene_03208;gene_09794;gene_01666;gene_04860;gene_06473;gene_01525;gene_05082;gene_08566;gene_00607;gene_00055;gene_09599;gene_00921;gene_06997;gene_00144;gene_05474;gene_02330;gene_03157	0.733279	0.743379
	GO:0008270	565	26	zinc ion binding	gene_10775;gene_00962;gene_00754;gene_09229;gene_05089;gene_01544;gene_01712;gene_09216;gene_00115;gene_09771;gene_09014;gene_01993;gene_09743;gene_10512;gene_06040;gene_00783;gene_01030;gene_07977;gene_05709;gene_03086;gene_05535;gene_09561;gene_01737;gene_06674;gene_07445;gene_10301	0.18376	0.2131
	GO:0046872	389	18	metal ion binding	gene_10243;gene_01070;gene_08045;gene_03208;gene_01666;gene_03381;gene_06473;gene_04616;gene_01012;gene_00783;gene_10326;gene_08031;gene_00055;gene_07298;gene_07145;gene_08179;gene_05871;gene_03792	0.207453	0.236111
	GO:0000166	384	15	nucleotide binding	gene_07191;gene_04993;gene_08842;gene_05038;gene_06473;gene_03565;gene_01012;gene_08309;gene_05082;gene_05669;gene_08566;gene_00607;gene_00921;gene_00144;gene_02293	0.462374	0.48569
	GO:0003677	383	27	DNA binding	gene_08917;gene_02211;gene_06261;gene_05338;gene_09771;gene_01158;gene_04860;gene_06073;gene_00946;gene_09743;gene_06040;gene_00783;gene_01030;gene_10326;gene_06305;gene_07977;gene_05709;gene_03086;gene_02916;gene_04834;gene_09561;gene_00055;gene_06818;gene_04975;gene_08179;gene_02507;gene_01618	0.00130609	0.00483155
	GO:0005515	374	22	protein binding	gene_02211;gene_09705;gene_10084;gene_00082;gene_02395;gene_05669;gene_07080;gene_07058;gene_05597;gene_06561;gene_01823;gene_00055;gene_07298;gene_09599;gene_08179;gene_06997;gene_07387;gene_02166;gene_02330;gene_03157;gene_03929;gene_06055	0.0247988	0.0400847
	GO:0016491	362	13	oxidoreductase activity	gene_05128;gene_00754;gene_10403;gene_02395;gene_03381;gene_06984;gene_03071;gene_02996;gene_04426;gene_07298;gene_07145;gene_00462;gene_01235	0.584554	0.604258
	GO:0003824	314	10	catalytic activity	gene_05571;gene_10406;gene_04039;gene_02395;gene_09701;gene_06473;gene_09475;gene_06383;gene_03521;gene_04667	0.712473	0.725618
	GO:0000981	283	18	DNA-binding transcription factor activity, RNA polymerase II-specific	gene_10775;gene_00962;gene_09229;gene_05089;gene_01712;gene_09216;gene_01494;gene_10512;gene_06040;gene_00783;gene_01030;gene_07977;gene_05709;gene_03086;gene_09561;gene_08179;gene_02507;gene_05871	0.0177405	0.0309896
	GO:0016787	264	8	hydrolase activity	gene_05571;gene_09688;gene_00937;gene_04397;gene_08103;gene_06665;gene_01949;gene_06203	0.730822	0.741569
	GO:0003676	221	13	nucleic acid binding	gene_09771;gene_09014;gene_04860;gene_03565;gene_04809;gene_10326;gene_05535;gene_08179;gene_08841;gene_02293;gene_05871;gene_10301;gene_03792	0.0576116	0.0785224
	GO:0016740	215	7	transferase activity	gene_07191;gene_09229;gene_05089;gene_05038;gene_08838;gene_04465;gene_00144	0.62868	0.64624
	GO:0003723	182	3	RNA binding	gene_04945;gene_00023;gene_06997	0.936075	0.938625
	GO:0016887	153	4	ATPase activity	gene_04993;gene_01015;gene_00607;gene_00921	0.734956	0.744396
	GO:0004674	139	6	protein serine/threonine kinase activity	gene_07191;gene_09794;gene_01525;gene_00144;gene_05474;gene_02330	0.316943	0.344056
	GO:0017111	118	3	nucleoside-triphosphatase activity	gene_04993;gene_08309;gene_00921	0.697262	0.711439
	GO:0005506	116	4	iron ion binding	gene_02395;gene_08959;gene_03071;gene_04426	0.493211	0.516608
	GO:0005525	112	4	GTP binding	gene_00850;gene_04888;gene_01012;gene_05669	0.462319	0.48569
	GO:0004672	110	3	protein kinase activity	gene_07191;gene_00144;gene_02330	0.643401	0.660758
	GO:0020037	104	4	heme binding	gene_02395;gene_07298;gene_07145;gene_03157	0.399142	0.425751
	GO:0016301	98	3	kinase activity	gene_07191;gene_05038;gene_00144	0.551713	0.574073
	GO:0050660	95	5	flavin adenine dinucleotide binding	gene_10403;gene_04425;gene_07412;gene_02996;gene_02274	0.176957	0.205643
	GO:0022857	94	2	transmembrane transporter activity	gene_03804;gene_04225	0.729119	0.741214
	GO:0003924	85	3	GTPase activity	gene_00850;gene_01012;gene_05669	0.440157	0.465152
	GO:0042626	77	2	ATPase activity, coupled to transmembrane movement of substances	gene_01015;gene_05082	0.597089	0.614912
	GO:0005509	70	1	calcium ion binding	gene_08607	0.774129	0.780491
	GO:0004497	66	1	monooxygenase activity	gene_02395	0.745339	0.75284
	GO:0003682	65	3	chromatin binding	gene_08917;gene_08523;gene_06305	0.258997	0.287658
	GO:0030170	65	1	pyridoxal phosphate binding	gene_08891	0.737667	0.746457
	GO:0004252	64	1	serine-type endopeptidase activity	gene_05960	0.7298	0.741214
	GO:0051082	62	4	unfolded protein binding	gene_00720;gene_06119;gene_03389;gene_02774	0.0996943	0.125642
	GO:0043565	61	10	sequence-specific DNA binding	gene_06261;gene_01158;gene_00946;gene_00783;gene_10326;gene_04834;gene_06818;gene_00398;gene_02507;gene_01618	2.3541e-05	0.000143587
	GO:0003700	60	6	DNA-binding transcription factor activity	gene_06261;gene_01158;gene_00946;gene_10326;gene_04834;gene_04975	0.00936367	0.0184598
	GO:0003729	53	2	mRNA binding	gene_08979;gene_04615	0.353644	0.379051
	GO:0000978	51	5	RNA polymerase II proximal promoter sequence-specific DNA binding	gene_00082;gene_01494;gene_00783;gene_04975;gene_02507	0.0151329	0.026603
	GO:0004553	50	5	hydrolase activity, hydrolyzing O-glycosyl compounds	gene_02607;gene_09688;gene_03066;gene_10578;gene_08013	0.0138	0.0257632
	GO:0000287	50	4	magnesium ion binding	gene_03381;gene_06473;gene_09598;gene_06997	0.0475995	0.0667723
	GO:0004386	49	1	helicase activity	gene_04860	0.586583	0.604657
	GO:0016747	43	1	transferase activity, transferring acyl groups other than amino-acyl groups	gene_01126	0.515416	0.537318
	GO:0042803	42	2	protein homodimerization activity	gene_00607;gene_07298	0.233311	0.260968
	GO:0061630	42	1	ubiquitin protein ligase activity	gene_03792	0.502793	0.525648
	GO:0071949	42	1	FAD binding	gene_07145	0.502793	0.525648
	GO:0016798	41	3	hydrolase activity, acting on glycosyl bonds	gene_05571;gene_09688;gene_04397	0.0788259	0.103718
	GO:0003690	40	1	double-stranded DNA binding	gene_04828	0.476923	0.500022
	GO:0031177	40	1	phosphopantetheine binding	gene_10406	0.476923	0.500022
	GO:0008168	38	1	methyltransferase activity	gene_09598	0.450252	0.474764
	GO:0009055	34	1	electron transfer activity	gene_10390	0.394722	0.421444
	GO:0005096	33	4	GTPase activator activity	gene_00762;gene_02332;gene_05135;gene_01737	0.0091889	0.0181477
	GO:0005543	32	4	phospholipid binding	gene_04660;gene_05409;gene_01737;gene_00365	0.00805301	0.0177799
	GO:0003743	32	1	translation initiation factor activity	gene_08044	0.366007	0.391923
	GO:0003777	31	1	microtubule motor activity	gene_00607	0.351453	0.377069
	GO:0016829	30	3	lyase activity	gene_08045;gene_06473;gene_08566	0.0298523	0.0455206
	GO:0001228	28	6	DNA-binding transcription activator activity, RNA polymerase II-specific	gene_05338;gene_00082;gene_01494;gene_10326;gene_04975;gene_02507	8.52662e-05	0.000492847
	GO:0051287	28	2	NAD binding	gene_03381;gene_03010	0.0984822	0.124256
	GO:0000049	28	1	tRNA binding	gene_08842	0.307176	0.333781
	GO:0016791	27	1	phosphatase activity	gene_06203	0.292269	0.318839
	GO:0046982	27	1	protein heterodimerization activity	gene_06818	0.292269	0.318839
	GO:0003899	26	1	DNA-directed 5'-3' RNA polymerase activity	gene_06073	0.277321	0.305247
	GO:0008017	26	1	microtubule binding	gene_00607	0.277321	0.305247
	GO:0010181	25	2	FMN binding	gene_00462;gene_01235	0.0753288	0.0997158
	GO:0003684	24	2	damaged DNA binding	gene_01070;gene_02274	0.0682197	0.0910492
	GO:0008061	24	1	chitin binding	gene_09688	0.247392	0.275046
	GO:0015171	24	1	amino acid transmembrane transporter activity	gene_09526	0.247392	0.275046
	GO:0019901	24	1	protein kinase binding	gene_04945	0.247392	0.275046
	GO:0016616	23	1	oxidoreductase activity, acting on the CH-OH group of donors, NAD or NADP as acceptor	gene_03381	0.232461	0.260545
	GO:0051536	23	1	iron-sulfur cluster binding	gene_08959	0.232461	0.260545
	GO:0016746	22	2	transferase activity, transferring acyl groups	gene_02954;gene_00719	0.0549844	0.0769364
	GO:0003779	22	1	actin binding	gene_10391	0.217589	0.245371
	GO:0004568	22	1	chitinase activity	gene_09688	0.217589	0.245371
	GO:0032266	21	1	phosphatidylinositol-3-phosphate binding	gene_02332	0.202807	0.231062
	GO:0003688	20	1	DNA replication origin binding	gene_02507	0.188147	0.217047
	GO:0004843	19	1	thiol-dependent ubiquitin-specific protease activity	gene_02381	0.173645	0.20222
	GO:0050662	19	1	coenzyme binding	gene_06383	0.173645	0.20222
	GO:0046983	18	3	protein dimerization activity	gene_01158;gene_06493;gene_02507	0.00484211	0.0112304
	GO:0003712	18	2	transcription coregulator activity	gene_05964;gene_01995	0.0327187	0.0498226
	GO:0004713	18	1	protein tyrosine kinase activity	gene_05474	0.159339	0.187738
	GO:0005516	18	1	calmodulin binding	gene_08031	0.159339	0.187738
	GO:0016779	18	1	nucleotidyltransferase activity	gene_04465	0.159339	0.187738
	GO:0008134	17	3	transcription factor binding	gene_00783;gene_02507;gene_01618	0.00388628	0.010748
	GO:0004721	17	2	phosphoprotein phosphatase activity	gene_08031;gene_06203	0.0280726	0.0443622
	GO:0005085	17	2	guanyl-nucleotide exchange factor activity	gene_08044;gene_01978	0.0280726	0.0443622
	GO:0004523	17	1	RNA-DNA hybrid ribonuclease activity	gene_03792	0.14527	0.173008
	GO:0008395	17	1	steroid hydroxylase activity	gene_02395	0.14527	0.173008
	GO:0016853	17	1	isomerase activity	gene_03389	0.14527	0.173008
	GO:0016874	17	1	ligase activity	gene_08842	0.14527	0.173008
	GO:0035673	17	1	oligopeptide transmembrane transporter activity	gene_07682	0.14527	0.173008
	GO:0051015	17	1	actin filament binding	gene_10391	0.14527	0.173008
	GO:0001227	16	2	DNA-binding transcription repressor activity, RNA polymerase II-specific	gene_00783;gene_02507	0.0238044	0.0385338
	GO:0019899	16	2	enzyme binding	gene_02395;gene_07298	0.0238044	0.0385338
	GO:0051537	16	2	2 iron, 2 sulfur cluster binding	gene_10390;gene_04426	0.0238044	0.0385338
	GO:0003755	15	1	peptidyl-prolyl cis-trans isomerase activity	gene_03389	0.118023	0.144614
	GO:0004043	15	1	L-aminoadipate-semialdehyde dehydrogenase activity	gene_10406	0.118023	0.144614
	GO:0005484	15	1	SNAP receptor activity	gene_08514	0.118023	0.144614
	GO:0008324	15	1	cation transmembrane transporter activity	gene_04939	0.118023	0.144614
	GO:0015035	15	1	protein disulfide oxidoreductase activity	gene_10390	0.118023	0.144614
	GO:0042393	15	1	histone binding	gene_05597	0.118023	0.144614
	GO:0043022	15	1	ribosome binding	gene_00850	0.118023	0.144614
	GO:0070330	15	1	aromatase activity	gene_02395	0.118023	0.144614
	GO:0016614	14	2	oxidoreductase activity, acting on CH-OH group of donors	gene_07412;gene_02996	0.0164076	0.0287069
	GO:0016831	14	1	carboxy-lyase activity	gene_08566	0.104942	0.131058
	GO:0030145	12	2	manganese ion binding	gene_03812;gene_06997	0.0105185	0.0205529
	GO:0004338	12	1	glucan exo-1,3-beta-glucosidase activity	gene_02910	0.0801375	0.103718
	GO:0004725	12	1	protein tyrosine phosphatase activity	gene_06203	0.0801375	0.103718
	GO:0004812	12	1	aminoacyl-tRNA ligase activity	gene_08842	0.0801375	0.103718
	GO:0015297	12	1	antiporter activity	gene_08843	0.0801375	0.103718
	GO:0016712	12	1	oxidoreductase activity, acting on paired donors, with incorporation or reduction of molecular oxygen, reduced flavin or flavoprotein as one donor, and incorporation of one atom of oxygen	gene_02395	0.0801375	0.103718
	GO:0042910	12	1	xenobiotic transmembrane transporter activity	gene_04225	0.0801375	0.103718
	GO:0051213	12	1	dioxygenase activity	gene_07298	0.0801375	0.103718
	GO:0051787	12	1	misfolded protein binding	gene_01070	0.0801375	0.103718
	GO:0003746	11	1	translation elongation factor activity	gene_00850	0.0685343	0.0910492
	GO:0061631	11	1	ubiquitin conjugating enzyme activity	gene_09599	0.0685343	0.0910492
	GO:0008047	10	2	enzyme activator activity	gene_04809;gene_07387	0.00608704	0.0139132
	GO:0003727	10	1	single-stranded RNA binding	gene_06997	0.0575509	0.0785224
	GO:0008496	10	1	mannan endo-1,6-alpha-mannosidase activity	gene_05571	0.0575509	0.0785224
	GO:0008559	10	1	xenobiotic transmembrane transporting ATPase activity	gene_01015	0.0575509	0.0785224
	GO:0016279	10	1	protein-lysine N-methyltransferase activity	gene_08364	0.0575509	0.0785224
	GO:0016772	10	1	transferase activity, transferring phosphorus-containing groups	gene_05038	0.0575509	0.0785224
	GO:0061608	10	1	nuclear import signal receptor activity	gene_03435	0.0575509	0.0785224
	GO:0000155	9	2	phosphorelay sensor kinase activity	gene_05038;gene_03157	0.00438926	0.010748
	GO:0038023	9	2	signaling receptor activity	gene_04616;gene_01724	0.00438926	0.010748
	GO:0042124	9	2	1,3-beta-glucanosyltransferase activity	gene_02910;gene_08838	0.00438926	0.010748
	GO:0000293	9	1	ferric-chelate reductase activity	gene_08829	0.0472581	0.0663778
	GO:0004601	9	1	peroxidase activity	gene_07298	0.0472581	0.0663778
	GO:0004712	9	1	protein serine/threonine/tyrosine kinase activity	gene_05474	0.0472581	0.0663778
	GO:0015116	9	1	sulfate transmembrane transporter activity	gene_08843	0.0472581	0.0663778
	GO:0015616	9	1	DNA translocase activity	gene_07383	0.0472581	0.0663778
	GO:0019003	9	1	GDP binding	gene_05669	0.0472581	0.0663778
	GO:0044212	9	1	transcription regulatory region DNA binding	gene_02507	0.0472581	0.0663778
	GO:0016407	8	2	acetyltransferase activity	gene_09229;gene_05089	0.00301449	0.00901896
	GO:0004359	8	1	glutaminase activity	gene_08802	0.0377317	0.0548208
	GO:0008138	8	1	protein tyrosine/serine/threonine phosphatase activity	gene_06203	0.0377317	0.0548208
	GO:0015095	8	1	magnesium ion transmembrane transporter activity	gene_01635	0.0377317	0.0548208
	GO:0016251	8	1	RNA polymerase II general transcription initiation factor activity	gene_07383	0.0377317	0.0548208
	GO:0016702	8	1	oxidoreductase activity, acting on single donors with incorporation of molecular oxygen, incorporation of two atoms of oxygen	gene_07298	0.0377317	0.0548208
	GO:0030234	8	1	enzyme regulator activity	gene_08044	0.0377317	0.0548208
	GO:0043015	8	1	gamma-tubulin binding	gene_06102	0.0377317	0.0548208
	GO:0070006	8	1	metalloaminopeptidase activity	gene_01993	0.0377317	0.0548208
	GO:0070273	8	1	phosphatidylinositol-4-phosphate binding	gene_02332	0.0377317	0.0548208
	GO:0101020	8	1	estrogen 16-alpha-hydroxylase activity	gene_02395	0.0377317	0.0548208
	GO:0005355	7	2	glucose transmembrane transporter activity	gene_00281;gene_01410	0.00194104	0.00587098
	GO:0031491	7	2	nucleosome binding	gene_10243;gene_01618	0.00194104	0.00587098
	GO:0005199	7	1	structural constituent of cell wall	gene_01070	0.0290524	0.0443622
	GO:0008574	7	1	ATP-dependent microtubule motor activity, plus-end-directed	gene_00607	0.0290524	0.0443622
	GO:0019887	7	1	protein kinase regulator activity	gene_07348	0.0290524	0.0443622
	GO:0019888	7	1	protein phosphatase regulator activity	gene_10238	0.0290524	0.0443622
	GO:0030544	7	1	Hsp70 protein binding	gene_02395	0.0290524	0.0443622
	GO:1904680	7	1	peptide transmembrane transporter activity	gene_07682	0.0290524	0.0443622
	GO:0000987	6	3	proximal promoter sequence-specific DNA binding	gene_10326;gene_08179;gene_02507	3.47043e-05	0.000209364
	GO:0048037	6	3	cofactor binding	gene_03208;gene_00719;gene_00462	3.47043e-05	0.000209364
	GO:0001102	6	2	RNA polymerase II activating transcription factor binding	gene_10390;gene_02507	0.00114278	0.00483155
	GO:0005546	6	2	phosphatidylinositol-4,5-bisphosphate binding	gene_02332;gene_04888	0.00114278	0.00483155
	GO:0015189	6	2	L-lysine transmembrane transporter activity	gene_09526;gene_02085	0.00114278	0.00483155
	GO:0000009	6	1	alpha-1,6-mannosyltransferase activity	gene_06474	0.0213063	0.0347447
	GO:0000977	6	1	RNA polymerase II regulatory region sequence-specific DNA binding	gene_01158	0.0213063	0.0347447
	GO:0004467	6	1	long-chain fatty acid-CoA ligase activity	gene_09705	0.0213063	0.0347447
	GO:0005086	6	1	ARF guanyl-nucleotide exchange factor activity	gene_05409	0.0213063	0.0347447
	GO:0016018	6	1	cyclosporin A binding	gene_03389	0.0213063	0.0347447
	GO:0019239	6	1	deaminase activity	gene_09193	0.0213063	0.0347447
	GO:0031386	6	1	protein tag	gene_01823	0.0213063	0.0347447
	GO:0031624	6	1	ubiquitin conjugating enzyme binding	gene_03792	0.0213063	0.0347447
	GO:0045735	6	1	nutrient reservoir activity	gene_03812	0.0213063	0.0347447
	GO:0052689	6	1	carboxylic ester hydrolase activity	gene_06665	0.0213063	0.0347447
	GO:0080025	6	1	phosphatidylinositol-3,5-bisphosphate binding	gene_02332	0.0213063	0.0347447
	GO:0008301	5	2	DNA binding, bending	gene_01158;gene_01618	0.000588742	0.00318613
	GO:0003747	5	1	translation release factor activity	gene_03677	0.0145851	0.0257632
	GO:0004623	5	1	phospholipase A2 activity	gene_06665	0.0145851	0.0257632
	GO:0005310	5	1	dicarboxylic acid transmembrane transporter activity	gene_08843	0.0145851	0.0257632
	GO:0008144	5	1	drug binding	gene_00850	0.0145851	0.0257632
	GO:0008843	5	1	endochitinase activity	gene_09688	0.0145851	0.0257632
	GO:0015036	5	1	disulfide oxidoreductase activity	gene_10390	0.0145851	0.0257632
	GO:0015181	5	1	arginine transmembrane transporter activity	gene_09526	0.0145851	0.0257632
	GO:0019784	5	1	NEDD8-specific protease activity	gene_02381	0.0145851	0.0257632
	GO:0032934	5	1	sterol binding	gene_03906	0.0145851	0.0257632
	GO:0042973	5	1	glucan endo-1,3-beta-D-glucosidase activity	gene_02910	0.0145851	0.0257632
	GO:0051011	5	1	microtubule minus-end binding	gene_06102	0.0145851	0.0257632
	GO:0051879	5	1	Hsp90 protein binding	gene_02395	0.0145851	0.0257632
	GO:1901584	5	1	tetrapeptide transmembrane transporter activity	gene_07682	0.0145851	0.0257632
	GO:0015093	4	2	ferrous iron transmembrane transporter activity	gene_07080;gene_07058	0.000242663	0.0013599
	GO:0001664	4	1	G protein-coupled receptor binding	gene_01012	0.00898657	0.0177799
	GO:0003996	4	1	acyl-CoA ligase activity	gene_09705	0.00898657	0.0177799
	GO:0004103	4	1	choline kinase activity	gene_09492	0.00898657	0.0177799
	GO:0004305	4	1	ethanolamine kinase activity	gene_09492	0.00898657	0.0177799
	GO:0004673	4	1	protein histidine kinase activity	gene_05038	0.00898657	0.0177799
	GO:0005353	4	1	fructose transmembrane transporter activity	gene_01410	0.00898657	0.0177799
	GO:0008474	4	1	palmitoyl-(protein) hydrolase activity	gene_06665	0.00898657	0.0177799
	GO:0010314	4	1	phosphatidylinositol-5-phosphate binding	gene_02332	0.00898657	0.0177799
	GO:0031683	4	1	G-protein beta/gamma-subunit complex binding	gene_01012	0.00898657	0.0177799
	GO:0032451	4	1	demethylase activity	gene_02395	0.00898657	0.0177799
	GO:0050072	4	1	m7G(5')pppN diphosphatase activity	gene_06997	0.00898657	0.0177799
	GO:0102391	4	1	decanoate-CoA ligase activity	gene_09705	0.00898657	0.0177799
	GO:0003951	3	2	NAD+ kinase activity	gene_04634;gene_06664	6.25155e-05	0.000363248
	GO:0001139	3	1	RNA polymerase II complex recruiting activity	gene_07383	0.00461462	0.010748
	GO:0004143	3	1	diacylglycerol kinase activity	gene_00950	0.00461462	0.010748
	GO:0004356	3	1	glutamate-ammonia ligase activity	gene_09701	0.00461462	0.010748
	GO:0004666	3	1	prostaglandin-endoperoxide synthase activity	gene_07298	0.00461462	0.010748
	GO:0004733	3	1	pyridoxamine-phosphate oxidase activity	gene_00462	0.00461462	0.010748
	GO:0004826	3	1	phenylalanine-tRNA ligase activity	gene_08842	0.00461462	0.010748
	GO:0005044	3	1	scavenger receptor activity	gene_03119	0.00461462	0.010748
	GO:0005313	3	1	L-glutamate transmembrane transporter activity	gene_09526	0.00461462	0.010748
	GO:0008379	3	1	thioredoxin peroxidase activity	gene_10195	0.00461462	0.010748
	GO:0008441	3	1	3'(2'),5'-bisphosphate nucleotidase activity	gene_09605	0.00461462	0.010748
	GO:0015038	3	1	glutathione disulfide oxidoreductase activity	gene_10390	0.00461462	0.010748
	GO:0015079	3	1	potassium ion transmembrane transporter activity	gene_04939	0.00461462	0.010748
	GO:0015140	3	1	malate transmembrane transporter activity	gene_08843	0.00461462	0.010748
	GO:0016830	3	1	carbon-carbon lyase activity	gene_04667	0.00461462	0.010748
	GO:0019825	3	1	oxygen binding	gene_07145	0.00461462	0.010748
	GO:0042826	3	1	histone deacetylase binding	gene_10243	0.00461462	0.010748
	GO:0050031	3	1	L-pipecolate oxidase activity	gene_04425	0.00461462	0.010748
	GO:0061459	3	1	L-arginine transmembrane transporter activity	gene_09526	0.00461462	0.010748
	GO:0070576	3	1	vitamin D 24-hydroxylase activity	gene_02395	0.00461462	0.010748
	GO:0042736	2	2	NADH kinase activity	gene_04634;gene_06664	0	0
	GO:0061840	2	2	high-affinity ferrous iron transmembrane transporter activity	gene_07080;gene_07058	0	0
	GO:0000170	2	1	sphingosine hydroxylase activity	gene_03071	0.00157988	0.00483155
	GO:0000298	2	1	endopolyphosphatase activity	gene_06525	0.00157988	0.00483155
	GO:0001103	2	1	RNA polymerase II repressing transcription factor binding	gene_02507	0.00157988	0.00483155
	GO:0003878	2	1	ATP citrate synthase activity	gene_03208	0.00157988	0.00483155
	GO:0003904	2	1	deoxyribodipyrimidine photo-lyase activity	gene_02274	0.00157988	0.00483155
	GO:0004049	2	1	anthranilate synthase activity	gene_05969	0.00157988	0.00483155
	GO:0004060	2	1	arylamine N-acetyltransferase activity	gene_03236	0.00157988	0.00483155
	GO:0004309	2	1	exopolyphosphatase activity	gene_06525	0.00157988	0.00483155
	GO:0004354	2	1	glutamate dehydrogenase (NADP+) activity	gene_05128	0.00157988	0.00483155
	GO:0004723	2	1	calcium-dependent protein serine/threonine phosphatase activity	gene_08031	0.00157988	0.00483155
	GO:0005290	2	1	L-histidine transmembrane transporter activity	gene_09526	0.00157988	0.00483155
	GO:0005302	2	1	L-tyrosine transmembrane transporter activity	gene_09526	0.00157988	0.00483155
	GO:0005351	2	1	carbohydrate:proton symporter activity	gene_01410	0.00157988	0.00483155
	GO:0008106	2	1	alcohol dehydrogenase (NADP+) activity	gene_01544	0.00157988	0.00483155
	GO:0008440	2	1	inositol-1,4,5-trisphosphate 3-kinase activity	gene_02196	0.00157988	0.00483155
	GO:0008477	2	1	purine nucleosidase activity	gene_04397	0.00157988	0.00483155
	GO:0008597	2	1	calcium-dependent protein serine/threonine phosphatase regulator activity	gene_08841	0.00157988	0.00483155
	GO:0010521	2	1	telomerase inhibitor activity	gene_04809	0.00157988	0.00483155
	GO:0015131	2	1	oxaloacetate transmembrane transporter activity	gene_08843	0.00157988	0.00483155
	GO:0015141	2	1	succinate transmembrane transporter activity	gene_08843	0.00157988	0.00483155
	GO:0015188	2	1	L-isoleucine transmembrane transporter activity	gene_02085	0.00157988	0.00483155
	GO:0016149	2	1	translation release factor activity, codon specific	gene_03677	0.00157988	0.00483155
	GO:0016679	2	1	oxidoreductase activity, acting on diphenols and related substances as donors	gene_02395	0.00157988	0.00483155
	GO:0016708	2	1	oxidoreductase activity, acting on paired donors, with incorporation or reduction of molecular oxygen, NAD(P)H as one donor, and incorporation of two atoms of oxygen into one donor	gene_04426	0.00157988	0.00483155
	GO:0016711	2	1	flavonoid 3'-monooxygenase activity	gene_02395	0.00157988	0.00483155
	GO:0016799	2	1	hydrolase activity, hydrolyzing N-glycosyl compounds	gene_04397	0.00157988	0.00483155
	GO:0017076	2	1	purine nucleotide binding	gene_08566	0.00157988	0.00483155
	GO:0019151	2	1	galactose 1-dehydrogenase activity	gene_06984	0.00157988	0.00483155
	GO:0030745	2	1	dimethylhistidine N-methyltransferase activity	gene_08607	0.00157988	0.00483155
	GO:0033192	2	1	calmodulin-dependent protein phosphatase activity	gene_08031	0.00157988	0.00483155
	GO:0034338	2	1	short-chain carboxylesterase activity	gene_06665	0.00157988	0.00483155
	GO:0034737	2	1	ergosterol O-acyltransferase activity	gene_07880	0.00157988	0.00483155
	GO:0042284	2	1	sphingolipid delta-4 desaturase activity	gene_03071	0.00157988	0.00483155
	GO:0044876	2	1	hercynylselenocysteine synthase	gene_08607	0.00157988	0.00483155
	GO:0051699	2	1	proline oxidase activity	gene_04425	0.00157988	0.00483155
	GO:0052706	2	1	histidine N-methyltransferase activity	gene_08607	0.00157988	0.00483155
	GO:0061686	2	1	hercynylcysteine sulfoxide synthase	gene_08607	0.00157988	0.00483155
	GO:0070491	2	1	repressing transcription factor binding	gene_00783	0.00157988	0.00483155
	GO:0140107	2	1	high-affinity potassium ion transmembrane transporter activity	gene_04939	0.00157988	0.00483155
	GO:0000224	1	1	peptide-N4-(N-acetyl-beta-glucosaminyl)asparagine amidase activity	gene_01070	0	0
	GO:0003864	1	1	3-methyl-2-oxobutanoate hydroxymethyltransferase activity	gene_09598	0	0
	GO:0003913	1	1	DNA photolyase activity	gene_02274	0	0
	GO:0003918	1	1	DNA topoisomerase type II (ATP-hydrolyzing) activity	gene_00055	0	0
	GO:0003977	1	1	UDP-N-acetylglucosamine diphosphorylase activity	gene_04465	0	0
	GO:0003979	1	1	UDP-glucose 6-dehydrogenase activity	gene_03010	0	0
	GO:0004016	1	1	adenylate cyclase activity	gene_06473	0	0
	GO:0004417	1	1	hydroxyethylthiazole kinase activity	gene_01666	0	0
	GO:0004424	1	1	imidazoleglycerol-phosphate dehydratase activity	gene_08045	0	0
	GO:0004441	1	1	inositol-1,4-bisphosphate 1-phosphatase activity	gene_09605	0	0
	GO:0004450	1	1	isocitrate dehydrogenase (NADP+) activity	gene_03381	0	0
	GO:0004452	1	1	isopentenyl-diphosphate delta-isomerase activity	gene_00937	0	0
	GO:0004611	1	1	phosphoenolpyruvate carboxykinase activity	gene_08566	0	0
	GO:0004612	1	1	phosphoenolpyruvate carboxykinase (ATP) activity	gene_08566	0	0
	GO:0004755	1	1	saccharopine dehydrogenase (NADP+, L-glutamate-forming) activity	gene_03434	0	0
	GO:0004772	1	1	sterol O-acyltransferase activity	gene_07880	0	0
	GO:0004789	1	1	thiamine-phosphate diphosphorylase activity	gene_01666	0	0
	GO:0004848	1	1	ureidoglycolate hydrolase activity	gene_06769	0	0
	GO:0005094	1	1	Rho GDP-dissociation inhibitor activity	gene_08618	0	0
	GO:0005344	1	1	oxygen carrier activity	gene_07145	0	0
	GO:0008928	1	1	mannose-1-phosphate guanylyltransferase (GDP) activity	gene_06056	0	0
	GO:0008941	1	1	nitric oxide dioxygenase activity	gene_07145	0	0
	GO:0015117	1	1	thiosulfate transmembrane transporter activity	gene_08843	0	0
	GO:0015149	1	1	hexose transmembrane transporter activity	gene_01410	0	0
	GO:0015182	1	1	L-asparagine transmembrane transporter activity	gene_02085	0	0
	GO:0015194	1	1	L-serine transmembrane transporter activity	gene_09526	0	0
	GO:0016411	1	1	acylglycerol O-acyltransferase activity	gene_02954	0	0
	GO:0016638	1	1	oxidoreductase activity, acting on the CH-NH2 group of donors	gene_00462	0	0
	GO:0016639	1	1	oxidoreductase activity, acting on the CH-NH2 group of donors, NAD or NADP as acceptor	gene_05128	0	0
	GO:0016670	1	1	oxidoreductase activity, acting on a sulfur group of donors, oxygen as acceptor	gene_00662	0	0
	GO:0016849	1	1	phosphorus-oxygen lyase activity	gene_06473	0	0
	GO:0018784	1	1	(S)-2-haloacid dehalogenase activity	gene_02874	0	0
	GO:0019001	1	1	guanyl nucleotide binding	gene_01012	0	0
	GO:0031682	1	1	G-protein gamma-subunit binding	gene_07387	0	0
	GO:0032093	1	1	SAM domain binding	gene_07348	0	0
	GO:0034038	1	1	deoxyhypusine synthase activity	gene_08918	0	0
	GO:0043754	1	1	dihydrolipoyllysine-residue (2-methylpropanoyl)transferase activity	gene_00719	0	0
	GO:0044377	1	1	RNA polymerase II proximal promoter sequence-specific DNA binding, bending	gene_02507	0	0
	GO:0045437	1	1	uridine nucleosidase activity	gene_04397	0	0
	GO:0047820	1	1	D-glutamate cyclase activity	gene_01716	0	0
	GO:0050263	1	1	ribosylpyrimidine nucleosidase activity	gene_04397	0	0
	GO:0050289	1	1	spermidine dehydrogenase activity	gene_08918	0	0
	GO:0050385	1	1	ureidoglycolate lyase activity	gene_06769	0	0
	GO:0052829	1	1	inositol-1,3,4-trisphosphate 1-phosphatase activity	gene_09605	0	0
	GO:0061505	1	1	DNA topoisomerase II activity	gene_00055	0	0
	GO:0070569	1	1	uridylyltransferase activity	gene_04465	0	0
	GO:0070635	1	1	nicotinamide riboside hydrolase activity	gene_04397	0	0
	GO:0070636	1	1	nicotinic acid riboside hydrolase activity	gene_04397	0	0

## Sheet: Supplementary Table 9
Supplementary Table 9. GO analysis of differentially methylated genes (DMGs) with CHG hypomethylation
Category	GO ID	Total read count	DMG count	GO term	Local gene IDs*	p-value	q-value
Biological Process	GO:0016998	18	1	cell wall macromolecule catabolic process	gene_08128	1.40131e-05	4.90458e-05
	GO:0070899	2	1	mitochondrial tRNA wobble uridine modification	gene_09806	9.17097e-08	6.41968e-07
Cellular Component	GO:0005575	3016	1	cellular_component	gene_08128	0.313367	0.313367
	GO:0005634	1441	1	nucleus	gene_07062	0.0838632	0.117409
	GO:0005739	511	1	mitochondrion	gene_09806	0.0114488	0.0200354
Molecular Function	GO:0003674	2499	1	molecular_function	gene_08128	0.227326	0.265214
	GO:0050660	95	1	flavin adenine dinucleotide binding	gene_09806	0.000406344	0.000948137

## Sheet: Supplementary Table 10
Supplementary Table 10. GO analysis of differentially methylated genes (DMGs) with CHH hypermethylation
Category	GO ID	Total read count	DMG count	GO term	Local gene IDs*	p-value	q-value
Biological Process	GO:0008150	2240	119	biological_process	gene_04669;gene_10629;gene_09866;gene_01763;gene_08917;gene_05533;gene_07184;gene_08765;gene_09952;gene_01296;gene_08922;gene_03390;gene_02300;gene_05288;gene_03070;gene_02099;gene_08411;gene_06049;gene_07446;gene_00155;gene_06009;gene_08364;gene_01382;gene_02890;gene_09014;gene_04447;gene_04436;gene_05326;gene_10809;gene_03489;gene_05646;gene_09189;gene_04244;gene_02214;gene_07839;gene_04283;gen…	0.0123113	0.0239908
	GO:0055114	513	17	oxidation-reduction process	gene_07373;gene_03728;gene_08410;gene_10403;gene_04460;gene_01779;gene_10414;gene_08089;gene_08504;gene_03010;gene_07764;gene_03682;gene_07999;gene_09529;gene_00069;gene_09611;gene_00158	0.891395	0.893673
	GO:0055085	429	17	transmembrane transport	gene_04070;gene_07701;gene_07260;gene_01074;gene_05625;gene_06299;gene_09639;gene_06887;gene_07249;gene_06768;gene_10565;gene_00796;gene_08579;gene_06864;gene_07178;gene_05892;gene_04253	0.652611	0.665753
	GO:0006355	309	22	regulation of transcription, DNA-templated	gene_02861;gene_07640;gene_03658;gene_01712;gene_07383;gene_02550;gene_05824;gene_01136;gene_06947;gene_01030;gene_06345;gene_03086;gene_04834;gene_04997;gene_03847;gene_08551;gene_03056;gene_05848;gene_04895;gene_09613;gene_10297;gene_04891	0.0115878	0.0226184
	GO:0008152	279	10	metabolic process	gene_08175;gene_02141;gene_03656;gene_02280;gene_09898;gene_08832;gene_01308;gene_09938;gene_09475;gene_04537	0.714603	0.724451
	GO:0006351	175	12	transcription, DNA-templated	gene_07640;gene_03658;gene_07312;gene_01136;gene_01030;gene_06345;gene_03086;gene_03056;gene_02480;gene_05848;gene_09613;gene_10297	0.0508309	0.0728511
	GO:0006508	170	5	proteolysis	gene_06025;gene_01119;gene_02966;gene_01993;gene_00379	0.781561	0.787583
	GO:0006468	118	3	protein phosphorylation	gene_04315;gene_07174;gene_07440	0.782599	0.787955
	GO:0006412	108	3	translation	gene_08842;gene_10413;gene_09787	0.720921	0.730227
	GO:0016310	100	4	phosphorylation	gene_06300;gene_05038;gene_07174;gene_07440	0.468192	0.49202
	GO:0031505	93	5	fungal-type cell wall organization	gene_10556;gene_02350;gene_02151;gene_03365;gene_01910	0.238548	0.269972
	GO:0006886	88	1	intracellular protein transport	gene_06072	0.910872	0.911647
	GO:0030447	87	3	filamentous growth	gene_10556;gene_07330;gene_04895	0.5527	0.573152
	GO:0006281	85	7	DNA repair	gene_10563;gene_06408;gene_05143;gene_07485;gene_04340;gene_05006;gene_01618	0.0363084	0.0547183
	GO:0045944	84	8	positive regulation of transcription by RNA polymerase II	gene_10563;gene_01494;gene_01158;gene_09426;gene_01014;gene_07382;gene_09613;gene_02507	0.0126197	0.024551
	GO:0006357	79	4	regulation of transcription by RNA polymerase II	gene_08180;gene_01494;gene_02550;gene_01618	0.280592	0.308363
	GO:0015031	79	4	protein transport	gene_07740;gene_06358;gene_09026;gene_06072	0.280592	0.308363
	GO:0000122	75	3	negative regulation of transcription by RNA polymerase II	gene_01494;gene_05023;gene_02507	0.436289	0.460549
	GO:0006364	71	3	rRNA processing	gene_05069;gene_09442;gene_06747	0.395469	0.420097
	GO:0034599	69	3	cellular response to oxidative stress	gene_00215;gene_01014;gene_03157	0.374873	0.402211
	GO:0035556	67	5	intracellular signal transduction	gene_06358;gene_04315;gene_01071;gene_01014;gene_07440	0.0790976	0.104487
	GO:0006511	65	7	ubiquitin-dependent protein catabolic process	gene_07230;gene_04595;gene_05591;gene_09442;gene_03399;gene_00379;gene_00920	0.00820574	0.0185377
	GO:0009267	64	1	cellular response to starvation	gene_01119	0.789036	0.793757
	GO:0030448	63	5	hyphal growth	gene_05018;gene_04834;gene_03255;gene_05848;gene_07543	0.0623122	0.0859807
	GO:0007165	62	8	signal transduction	gene_07740;gene_05038;gene_01012;gene_04987;gene_06072;gene_04440;gene_07387;gene_05474	0.00164647	0.00620484
	GO:0009405	61	3	pathogenesis	gene_02587;gene_07330;gene_04895	0.292518	0.320679
	GO:0006974	60	7	cellular response to DNA damage stimulus	gene_06298;gene_06358;gene_05143;gene_06209;gene_00920;gene_08396;gene_01618	0.00504833	0.0135188
	GO:0036180	60	1	filamentous growth of a population of unicellular organisms in response to biotic stimulus	gene_04895	0.758164	0.765317
	GO:0043161	58	2	proteasome-mediated ubiquitin-dependent protein catabolic process	gene_04963;gene_08396	0.486257	0.509639
	GO:0006897	57	3	endocytosis	gene_07230;gene_07740;gene_07231	0.252231	0.283278
	GO:0016192	55	1	vesicle-mediated transport	gene_06358	0.714167	0.724451
	GO:0006338	54	4	chromatin remodeling	gene_10563;gene_07383;gene_04543;gene_01618	0.0934759	0.119849
	GO:0006457	52	4	protein folding	gene_07390;gene_03594;gene_04594;gene_07330	0.0824532	0.108312
	GO:0006629	51	3	lipid metabolic process	gene_04862;gene_06409;gene_08114	0.194472	0.224687
	GO:0006888	50	1	ER to Golgi vesicle-mediated transport	gene_07330	0.663664	0.675721
	GO:0019748	48	1	secondary metabolic process	gene_04219	0.641542	0.656034
	GO:0071555	44	5	cell wall organization	gene_08175;gene_02141;gene_03656;gene_10556;gene_01910	0.0130683	0.0251741
	GO:0016567	43	4	protein ubiquitination	gene_01692;gene_09442;gene_04412;gene_01546	0.0421074	0.0628143
	GO:0016236	40	2	macroautophagy	gene_08581;gene_01493	0.266552	0.295973
	GO:0006325	40	1	chromatin organization	gene_04459	0.541696	0.562237
	GO:0009116	39	1	nucleoside metabolic process	gene_03679	0.527939	0.548926
	GO:0006811	38	2	ion transport	gene_01074;gene_07249	0.242092	0.272553
	GO:0007049	37	4	cell cycle	gene_05143;gene_08597;gene_07174;gene_02507	0.0236768	0.0409217
	GO:0006091	37	1	generation of precursor metabolites and energy	gene_03208	0.499599	0.523157
	GO:0034605	36	2	cellular response to heat	gene_01014;gene_07174	0.218037	0.247951
	GO:0051301	35	3	cell division	gene_05143;gene_01018;gene_08597	0.0699543	0.094705
	GO:0008202	34	1	steroid metabolic process	gene_06409	0.455109	0.478698
	GO:0018105	33	2	peptidyl-serine phosphorylation	gene_05474;gene_07440	0.18302	0.214129
	GO:0006348	31	4	chromatin silencing at telomere	gene_10563;gene_07244;gene_06885;gene_10498	0.0114805	0.0224461
	GO:0006366	30	5	transcription by RNA polymerase II	gene_10563;gene_07383;gene_04459;gene_04895;gene_01618	0.00186122	0.00620484
	GO:0009272	30	5	fungal-type cell wall biogenesis	gene_08175;gene_02141;gene_03656;gene_03594;gene_06717	0.00186122	0.00620484
	GO:0006606	30	1	protein import into nucleus	gene_00380	0.392447	0.417264
	GO:0007264	30	1	small GTPase mediated signal transduction	gene_06072	0.392447	0.417264
	GO:0030437	29	4	ascospore formation	gene_10314;gene_01012;gene_06717;gene_03031	0.00863288	0.019391
	GO:0009073	29	2	aromatic amino acid family biosynthetic process	gene_05969;gene_06252	0.139108	0.167756
	GO:0000278	29	1	mitotic cell cycle	gene_01018	0.376266	0.402239
	GO:0000723	29	1	telomere maintenance	gene_07485	0.376266	0.402239
	GO:0006644	29	1	phospholipid metabolic process	gene_08283	0.376266	0.402239
	GO:0006289	28	3	nucleotide-excision repair	gene_07485;gene_06885;gene_08396	0.0348454	0.0547183
	GO:0045454	28	2	cell redox homeostasis	gene_04339;gene_07044	0.128756	0.155911
	GO:0006914	28	1	autophagy	gene_08581	0.359911	0.386863
	GO:0010468	27	2	regulation of gene expression	gene_01071;gene_01014	0.118694	0.145373
	GO:0023052	27	2	signaling	gene_00215;gene_05474	0.118694	0.145373
	GO:0006915	27	1	apoptotic process	gene_06691	0.3434	0.369791
	GO:0007163	27	1	establishment or maintenance of cell polarity	gene_03255	0.3434	0.369791
	GO:0045292	27	1	mRNA cis splicing, via spliceosome	gene_02475	0.3434	0.369791
	GO:0051321	27	1	meiotic cell cycle	gene_01074	0.3434	0.369791
	GO:0006812	26	2	cation transport	gene_06299;gene_07249	0.108942	0.136555
	GO:0006696	26	1	ergosterol biosynthetic process	gene_06409	0.326755	0.353809
	GO:0006879	26	1	cellular iron ion homeostasis	gene_06299	0.326755	0.353809
	GO:0070787	25	3	conidiophore development	gene_04834;gene_05848;gene_07543	0.0239044	0.041194
	GO:0000398	25	1	mRNA splicing, via spliceosome	gene_02307	0.31	0.33753
	GO:0003333	25	1	amino acid transmembrane transport	gene_08000	0.31	0.33753
	GO:0034613	24	4	cellular protein localization	gene_07372;gene_07740;gene_09919;gene_04606	0.00371274	0.0110351
	GO:0070647	24	3	protein modification by small protein conjugation or removal	gene_02475;gene_03399;gene_07231	0.0207954	0.0361006
	GO:0006631	24	1	fatty acid metabolic process	gene_01009	0.293161	0.320679
	GO:0007015	24	1	actin filament organization	gene_02187	0.293161	0.320679
	GO:0030163	24	1	protein catabolic process	gene_08083	0.293161	0.320679
	GO:0006368	23	2	transcription elongation from RNA polymerase II promoter	gene_07383;gene_04541	0.0817395	0.107494
	GO:0043386	23	1	mycotoxin biosynthetic process	gene_06160	0.276268	0.30526
	GO:0006623	22	2	protein targeting to vacuole	gene_07391;gene_07231	0.0734189	0.0972037
	GO:0016573	22	2	histone acetylation	gene_07383;gene_04459	0.0734189	0.0972037
	GO:0030466	22	2	chromatin silencing at silent mating-type cassette	gene_07244;gene_09426	0.0734189	0.0972037
	GO:0000209	22	1	protein polyubiquitination	gene_01692	0.259353	0.288252
	GO:0000724	22	1	double-strand break repair via homologous recombination	gene_07485	0.259353	0.288252
	GO:0006099	22	1	tricarboxylic acid cycle	gene_02368	0.259353	0.288252
	GO:0007005	22	1	mitochondrion organization	gene_04945	0.259353	0.288252
	GO:0044550	22	1	secondary metabolite biosynthetic process	gene_04253	0.259353	0.288252
	GO:0045842	22	1	positive regulation of mitotic metaphase/anaphase transition	gene_08047	0.259353	0.288252
	GO:0000909	21	3	sporocarp development involved in sexual reproduction	gene_04834;gene_07543;gene_03031	0.0130153	0.0251444
	GO:0006367	21	3	transcription initiation from RNA polymerase II promoter	gene_07383;gene_06646;gene_04541	0.0130153	0.0251444
	GO:0048315	21	3	conidium formation	gene_04834;gene_01736;gene_05848	0.0130153	0.0251444
	GO:0000002	21	2	mitochondrial genome maintenance	gene_02350;gene_02151	0.0655014	0.0899593
	GO:0006397	21	2	mRNA processing	gene_02307;gene_03031	0.0655014	0.0899593
	GO:0023014	21	2	signal transduction by protein phosphorylation	gene_05038;gene_07174	0.0655014	0.0899593
	GO:0006139	21	1	nucleobase-containing compound metabolic process	gene_06769	0.24245	0.272553
	GO:0016311	21	1	dephosphorylation	gene_02187	0.24245	0.272553
	GO:0030702	21	1	chromatin silencing at centromere	gene_07244	0.24245	0.272553
	GO:0071470	21	1	cellular response to osmotic stress	gene_01014	0.24245	0.272553
	GO:0006418	20	1	tRNA aminoacylation for protein translation	gene_05106	0.225598	0.255561
	GO:0006874	19	3	cellular calcium ion homeostasis	gene_07740;gene_07249;gene_02759	0.00904549	0.0202791
	GO:0006310	19	2	DNA recombination	gene_07485;gene_06691	0.05094	0.0728511
	GO:0000245	19	1	spliceosomal complex assembly	gene_01071	0.208838	0.238875
	GO:0006470	19	1	protein dephosphorylation	gene_02187	0.208838	0.238875
	GO:0032147	19	1	activation of protein kinase activity	gene_07174	0.208838	0.238875
	GO:0042493	19	1	response to drug	gene_06747	0.208838	0.238875
	GO:0016126	18	3	sterol biosynthetic process	gene_01779;gene_06119;gene_06409	0.0073984	0.0167747
	GO:0016579	18	3	protein deubiquitination	gene_07230;gene_05591;gene_00379	0.0073984	0.0167747
	GO:0006096	18	1	glycolytic process	gene_09024	0.192217	0.222896
	GO:0030950	18	1	establishment or maintenance of actin cytoskeleton polarity	gene_07372	0.192217	0.222896
	GO:0031098	18	1	stress-activated protein kinase signaling cascade	gene_07174	0.192217	0.222896
	GO:0000747	17	2	conjugation with cellular fusion	gene_03255;gene_04891	0.0381707	0.0570138
	GO:0007275	17	2	multicellular organism development	gene_06358;gene_02507	0.0381707	0.0570138
	GO:0008652	17	2	cellular amino acid biosynthetic process	gene_06929;gene_02617	0.0381707	0.0570138
	GO:0043486	17	2	histone exchange	gene_10563;gene_06885	0.0381707	0.0570138
	GO:0044182	17	2	filamentous growth of a population of unicellular organisms	gene_07330;gene_04895	0.0381707	0.0570138
	GO:0045324	17	2	late endosome to vacuole transport	gene_07391;gene_07231	0.0381707	0.0570138
	GO:0071963	17	2	establishment or maintenance of cell polarity regulating cell shape	gene_07372;gene_03255	0.0381707	0.0570138
	GO:0006298	17	1	mismatch repair	gene_07485	0.175785	0.206074
	GO:0006865	17	1	amino acid transport	gene_08000	0.175785	0.206074
	GO:0043044	17	1	ATP-dependent chromatin remodeling	gene_10563	0.175785	0.206074
	GO:0051123	16	3	RNA polymerase II preinitiation complex assembly	gene_07383;gene_04459;gene_09613	0.00472391	0.0135188
	GO:0006525	16	2	arginine metabolic process	gene_08918;gene_02507	0.0324868	0.0515322
	GO:0030010	16	2	establishment of cell polarity	gene_04513;gene_03255	0.0324868	0.0515322
	GO:0070588	16	2	calcium ion transmembrane transport	gene_07249;gene_02759	0.0324868	0.0515322
	GO:0006855	16	1	drug transmembrane transport	gene_01247	0.159595	0.189167
	GO:0007018	16	1	microtubule-based movement	gene_01018	0.159595	0.189167
	GO:0007039	16	1	protein catabolic process in the vacuole	gene_01119	0.159595	0.189167
	GO:0007124	15	3	pseudohyphal growth	gene_01012;gene_07174;gene_04891	0.00367119	0.0109392
	GO:0000183	15	2	chromatin silencing at rDNA	gene_07244;gene_10498	0.0272812	0.0439261
	GO:0001302	15	2	replicative cell aging	gene_01012;gene_10498	0.0272812	0.0439261
	GO:0000226	15	1	microtubule cytoskeleton organization	gene_04606	0.143706	0.171544
	GO:0008380	15	1	RNA splicing	gene_02307	0.143706	0.171544
	GO:0031124	15	1	mRNA 3'-end processing	gene_04541	0.143706	0.171544
	GO:0050684	15	1	regulation of mRNA processing	gene_01071	0.143706	0.171544
	GO:0097308	15	1	cellular response to farnesol	gene_04460	0.143706	0.171544
	GO:0000160	14	4	phosphorelay signal transduction system	gene_05038;gene_04446;gene_04797;gene_03157	0.000253324	0.00152124
	GO:0006334	14	3	nucleosome assembly	gene_06209;gene_06885;gene_06210	0.00278983	0.00833409
	GO:0016052	14	3	carbohydrate catabolic process	gene_08175;gene_02141;gene_03656	0.00278983	0.00833409
	GO:0008033	14	2	tRNA processing	gene_05366;gene_03367	0.0225592	0.0390474
	GO:0000920	14	1	septum digestion after cytokinesis	gene_00215	0.128183	0.155698
	GO:0006260	14	1	DNA replication	gene_07485	0.128183	0.155698
	GO:0006270	14	1	DNA replication initiation	gene_06747	0.128183	0.155698
	GO:0010499	14	1	proteasomal ubiquitin-independent protein catabolic process	gene_04963	0.128183	0.155698
	GO:0050821	14	1	protein stabilization	gene_07740	0.128183	0.155698
	GO:0060303	14	1	regulation of nucleosome density	gene_10563	0.128183	0.155698
	GO:0007117	13	3	budding cell bud growth	gene_08175;gene_02141;gene_03656	0.00206512	0.00632979
	GO:0030148	13	3	sphingolipid biosynthetic process	gene_03594;gene_00104;gene_10215	0.00206512	0.00632979
	GO:0043328	13	3	protein transport to vacuole involved in ubiquitin-dependent protein catabolic process via the multivesicular body sorting pathway	gene_09026;gene_07391;gene_07231	0.00206512	0.00632979
	GO:0000768	13	2	syncytium formation by plasma membrane fusion	gene_01736;gene_07543	0.0183229	0.0319992
	GO:0000165	13	1	MAPK cascade	gene_07174	0.113094	0.139238
	GO:0006090	13	1	pyruvate metabolic process	gene_08089	0.113094	0.139238
	GO:0006301	13	1	postreplication repair	gene_06885	0.113094	0.139238
	GO:0006882	13	1	cellular zinc ion homeostasis	gene_05023	0.113094	0.139238
	GO:0007095	13	1	mitotic G2 DNA damage checkpoint	gene_09919	0.113094	0.139238
	GO:0008104	13	1	protein localization	gene_07740	0.113094	0.139238
	GO:0008361	13	1	regulation of cell size	gene_01012	0.113094	0.139238
	GO:0019740	13	1	nitrogen utilization	gene_01074	0.113094	0.139238
	GO:0030435	13	1	sporulation resulting in formation of a cellular spore	gene_01119	0.113094	0.139238
	GO:0031297	13	1	replication fork processing	gene_05143	0.113094	0.139238
	GO:0031573	13	1	intra-S DNA damage checkpoint	gene_06885	0.113094	0.139238
	GO:0001403	12	4	invasive growth in response to glucose limitation	gene_01012;gene_07174;gene_06717;gene_04891	0.00010798	0.000655118
	GO:0043066	12	3	negative regulation of apoptotic process	gene_08802;gene_04945;gene_06358	0.00148171	0.00620484
	GO:0019236	12	2	response to pheromone	gene_07174;gene_04891	0.0145711	0.0278865
	GO:0031122	12	2	cytoplasmic microtubule organization	gene_04606;gene_01018	0.0145711	0.0278865
	GO:0000422	12	1	autophagy of mitochondrion	gene_08581	0.0985138	0.124011
	GO:0001402	12	1	signal transduction involved in filamentous growth	gene_07174	0.0985138	0.124011
	GO:0006950	12	1	response to stress	gene_05825	0.0985138	0.124011
	GO:0009409	12	1	response to cold	gene_01724	0.0985138	0.124011
	GO:0010972	12	1	negative regulation of G2/M transition of mitotic cell cycle	gene_01014	0.0985138	0.124011
	GO:0018107	12	1	peptidyl-threonine phosphorylation	gene_05474	0.0985138	0.124011
	GO:0071805	12	1	potassium ion transmembrane transport	gene_07249	0.0985138	0.124011
	GO:0001934	11	2	positive regulation of protein phosphorylation	gene_06119;gene_07387	0.0112988	0.0222198
	GO:0000028	11	1	ribosomal small subunit assembly	gene_05069	0.0845233	0.108726
	GO:0000272	11	1	polysaccharide catabolic process	gene_00590	0.0845233	0.108726
	GO:0006006	11	1	glucose metabolic process	gene_09024	0.0845233	0.108726
	GO:0006267	11	1	pre-replicative complex assembly involved in nuclear cell cycle DNA replication	gene_06747	0.0845233	0.108726
	GO:0006526	11	1	arginine biosynthetic process	gene_00882	0.0845233	0.108726
	GO:0016558	11	1	protein import into peroxisome matrix	gene_01692	0.0845233	0.108726
	GO:0031048	11	1	chromatin silencing by small RNA	gene_07244	0.0845233	0.108726
	GO:0042307	11	1	positive regulation of protein import into nucleus	gene_01014	0.0845233	0.108726
	GO:0046854	11	1	phosphatidylinositol phosphorylation	gene_06288	0.0845233	0.108726
	GO:0071432	11	1	peptide mating pheromone maturation involved in positive regulation of conjugation with cellular fusion	gene_06685	0.0845233	0.108726
	GO:0006807	10	2	nitrogen compound metabolic process	gene_07373;gene_00882	0.0084965	0.0191212
	GO:0000011	10	1	vacuole inheritance	gene_07174	0.0712098	0.094705
	GO:0000077	10	1	DNA damage checkpoint	gene_06885	0.0712098	0.094705
	GO:0000079	10	1	regulation of cyclin-dependent protein serine/threonine kinase activity	gene_08597	0.0712098	0.094705
	GO:0000750	10	1	pheromone-dependent signal transduction involved in conjugation with cellular fusion	gene_07174	0.0712098	0.094705
	GO:0006284	10	1	base-excision repair	gene_07485	0.0712098	0.094705
	GO:0006369	10	1	termination of RNA polymerase II transcription	gene_04541	0.0712098	0.094705
	GO:0006694	10	1	steroid biosynthetic process	gene_06409	0.0712098	0.094705
	GO:0006816	10	1	calcium ion transport	gene_07249	0.0712098	0.094705
	GO:0006913	10	1	nucleocytoplasmic transport	gene_00380	0.0712098	0.094705
	GO:0016584	10	1	nucleosome positioning	gene_10563	0.0712098	0.094705
	GO:0034755	10	1	iron ion transmembrane transport	gene_07058	0.0712098	0.094705
	GO:0043162	10	1	ubiquitin-dependent protein catabolic process via the multivesicular body sorting pathway	gene_07230	0.0712098	0.094705
	GO:0051315	10	1	attachment of mitotic spindle microtubules to kinetochore	gene_07043	0.0712098	0.094705
	GO:0051568	10	1	histone H3-K4 methylation	gene_08303	0.0712098	0.094705
	GO:0051726	10	1	regulation of cell cycle	gene_08597	0.0712098	0.094705
	GO:0006342	9	2	chromatin silencing	gene_10556;gene_09919	0.00615014	0.0140558
	GO:0006687	9	1	glycosphingolipid metabolic process	gene_10215	0.0586671	0.081046
	GO:0006829	9	1	zinc ion transport	gene_01541	0.0586671	0.081046
	GO:0007118	9	1	budding cell apical bud growth	gene_07174	0.0586671	0.081046
	GO:0007186	9	1	G protein-coupled receptor signaling pathway	gene_01012	0.0586671	0.081046
	GO:0007586	9	1	digestion	gene_01862	0.0586671	0.081046
	GO:0008610	9	1	lipid biosynthetic process	gene_01779	0.0586671	0.081046
	GO:0010971	9	1	positive regulation of G2/M transition of mitotic cell cycle	gene_01014	0.0586671	0.081046
	GO:0034221	9	1	fungal-type cell wall chitin biosynthetic process	gene_07330	0.0586671	0.081046
	GO:0042797	9	1	tRNA transcription by RNA polymerase III	gene_02480	0.0586671	0.081046
	GO:0043065	9	1	positive regulation of apoptotic process	gene_07174	0.0586671	0.081046
	GO:0043547	9	1	positive regulation of GTPase activity	gene_07387	0.0586671	0.081046
	GO:0044088	9	1	regulation of vacuole organization	gene_06717	0.0586671	0.081046
	GO:0060237	9	1	regulation of fungal-type cell wall organization	gene_02587	0.0586671	0.081046
	GO:0042766	8	2	nucleosome mobilization	gene_10563;gene_07383	0.00424009	0.0124144
	GO:0071456	8	2	cellular response to hypoxia	gene_06298;gene_06358	0.00424009	0.0124144
	GO:0072659	8	2	protein localization to plasma membrane	gene_07740;gene_06717	0.00424009	0.0124144
	GO:1904669	8	2	ATP export	gene_07230;gene_07391	0.00424009	0.0124144
	GO:0000467	8	1	exonucleolytic trimming to generate mature 3'-end of 5.8S rRNA from tricistronic rRNA transcript (SSU-rRNA, 5.8S rRNA, LSU-rRNA)	gene_07765	0.0469967	0.0677051
	GO:0006000	8	1	fructose metabolic process	gene_09024	0.0469967	0.0677051
	GO:0006401	8	1	RNA catabolic process	gene_06691	0.0469967	0.0677051
	GO:0006817	8	1	phosphate ion transport	gene_08843	0.0469967	0.0677051
	GO:0009306	8	1	protein secretion	gene_08581	0.0469967	0.0677051
	GO:0010515	8	1	negative regulation of induction of conjugation with cellular fusion	gene_01014	0.0469967	0.0677051
	GO:0010629	8	1	negative regulation of gene expression	gene_07174	0.0469967	0.0677051
	GO:0031145	8	1	anaphase-promoting complex-dependent catabolic process	gene_08047	0.0469967	0.0677051
	GO:0033215	8	1	iron assimilation by reduction and transport	gene_07058	0.0469967	0.0677051
	GO:0036178	8	1	filamentous growth of a population of unicellular organisms in response to neutral pH	gene_04895	0.0469967	0.0677051
	GO:0045899	8	1	positive regulation of RNA polymerase II transcriptional preinitiation complex assembly	gene_04595	0.0469967	0.0677051
	GO:0071028	8	1	nuclear mRNA surveillance	gene_07765	0.0469967	0.0677051
	GO:0000282	7	2	cellular bud site selection	gene_05018;gene_07174	0.00274075	0.00822925
	GO:0000433	7	2	carbon catabolite repression of transcription from RNA polymerase II promoter by glucose	gene_00215;gene_07391	0.00274075	0.00822925
	GO:0048015	7	2	phosphatidylinositol-mediated signaling	gene_07728;gene_06288	0.00274075	0.00822925
	GO:0000103	7	1	sulfate assimilation	gene_03728	0.0363075	0.0547183
	GO:0000105	7	1	histidine biosynthetic process	gene_04460	0.0363075	0.0547183
	GO:0000256	7	1	allantoin catabolic process	gene_06769	0.0363075	0.0547183
	GO:0006013	7	1	mannose metabolic process	gene_09024	0.0363075	0.0547183
	GO:0006352	7	1	DNA-templated transcription, initiation	gene_06210	0.0363075	0.0547183
	GO:0006541	7	1	glutamine metabolic process	gene_06298	0.0363075	0.0547183
	GO:0006547	7	1	histidine metabolic process	gene_04460	0.0363075	0.0547183
	GO:0007121	7	1	bipolar cellular bud site selection	gene_07174	0.0363075	0.0547183
	GO:0010628	7	1	positive regulation of gene expression	gene_07740	0.0363075	0.0547183
	GO:0033962	7	1	cytoplasmic mRNA processing body assembly	gene_01018	0.0363075	0.0547183
	GO:0035023	7	1	regulation of Rho protein signal transduction	gene_03255	0.0363075	0.0547183
	GO:0036244	7	1	cellular response to neutral pH	gene_04895	0.0363075	0.0547183
	GO:0043248	7	1	proteasome assembly	gene_00920	0.0363075	0.0547183
	GO:0051382	7	1	kinetochore assembly	gene_05143	0.0363075	0.0547183
	GO:0070682	7	1	proteasome regulatory particle assembly	gene_04595	0.0363075	0.0547183
	GO:0070869	7	1	heterochromatin assembly involved in chromatin silencing	gene_07244	0.0363075	0.0547183
	GO:0090502	7	1	RNA phosphodiester bond hydrolysis, endonucleolytic	gene_06691	0.0363075	0.0547183
	GO:0098656	7	1	anion transmembrane transport	gene_07249	0.0363075	0.0547183
	GO:0120113	7	1	protein localization by the NVT pathway	gene_07231	0.0363075	0.0547183
	GO:1902969	7	1	mitotic DNA replication	gene_07485	0.0363075	0.0547183
	GO:0031138	6	2	negative regulation of conjugation with cellular fusion	gene_06336;gene_06318	0.00161987	0.00620484
	GO:0000722	6	1	telomere maintenance via recombination	gene_10563	0.026717	0.0432544
	GO:0000725	6	1	recombinational repair	gene_06885	0.026717	0.0432544
	GO:0006024	6	1	glycosaminoglycan biosynthetic process	gene_03010	0.026717	0.0432544
	GO:0006067	6	1	ethanol metabolic process	gene_04794	0.026717	0.0432544
	GO:0006531	6	1	aspartate metabolic process	gene_06252	0.026717	0.0432544
	GO:0006654	6	1	phosphatidic acid biosynthetic process	gene_03228	0.026717	0.0432544
	GO:0006999	6	1	nuclear pore organization	gene_00380	0.026717	0.0432544
	GO:0007097	6	1	nuclear migration	gene_01018	0.026717	0.0432544
	GO:0007155	6	1	cell adhesion	gene_04460	0.026717	0.0432544
	GO:0009113	6	1	purine nucleobase biosynthetic process	gene_02617	0.026717	0.0432544
	GO:0009231	6	1	riboflavin biosynthetic process	gene_03616	0.026717	0.0432544
	GO:0016239	6	1	positive regulation of macroautophagy	gene_08597	0.026717	0.0432544
	GO:0016477	6	1	cell migration	gene_07174	0.026717	0.0432544
	GO:0017148	6	1	negative regulation of translation	gene_02587	0.026717	0.0432544
	GO:0017157	6	1	regulation of exocytosis	gene_03594	0.026717	0.0432544
	GO:0030026	6	1	cellular manganese ion homeostasis	gene_02759	0.026717	0.0432544
	GO:0030100	6	1	regulation of endocytosis	gene_03255	0.026717	0.0432544
	GO:0031106	6	1	septin ring organization	gene_08597	0.026717	0.0432544
	GO:0035435	6	1	phosphate ion transmembrane transport	gene_08843	0.026717	0.0432544
	GO:0043171	6	1	peptide catabolic process	gene_04898	0.026717	0.0432544
	GO:0044406	6	1	adhesion of symbiont to host	gene_04460	0.026717	0.0432544
	GO:0045732	6	1	positive regulation of protein catabolic process	gene_04595	0.026717	0.0432544
	GO:0070086	6	1	ubiquitin-dependent endocytosis	gene_01546	0.026717	0.0432544
	GO:0071038	6	1	nuclear polyadenylation-dependent tRNA catabolic process	gene_07765	0.026717	0.0432544
	GO:0071421	6	1	manganese ion transmembrane transport	gene_02759	0.026717	0.0432544
	GO:0071577	6	1	zinc ion transmembrane transport	gene_01541	0.026717	0.0432544
	GO:0071902	6	1	positive regulation of protein serine/threonine kinase activity	gene_07387	0.026717	0.0432544
	GO:0030847	5	2	termination of RNA polymerase II transcription, exosome-dependent	gene_07765;gene_04541	0.000837787	0.0045864
	GO:0031647	5	2	regulation of protein stability	gene_07740;gene_05591	0.000837787	0.0045864
	GO:0034063	5	2	stress granule assembly	gene_01018;gene_07174	0.000837787	0.0045864
	GO:0048026	5	2	positive regulation of mRNA splicing, via spliceosome	gene_00215;gene_01071	0.000837787	0.0045864
	GO:0060236	5	2	regulation of mitotic spindle organization	gene_03255;gene_01018	0.000837787	0.0045864
	GO:0061246	5	2	establishment or maintenance of bipolar cell polarity regulating cell shape	gene_07372;gene_03255	0.000837787	0.0045864
	GO:0000023	5	1	maltose metabolic process	gene_07974	0.0183513	0.0319992
	GO:0000025	5	1	maltose catabolic process	gene_07974	0.0183513	0.0319992
	GO:0000162	5	1	tryptophan biosynthetic process	gene_05969	0.0183513	0.0319992
	GO:0000187	5	1	activation of MAPK activity	gene_07387	0.0183513	0.0319992
	GO:0000288	5	1	nuclear-transcribed mRNA catabolic process, deadenylation-dependent decay	gene_08979	0.0183513	0.0319992
	GO:0000712	5	1	resolution of meiotic recombination intermediates	gene_05143	0.0183513	0.0319992
	GO:0000753	5	1	cell morphogenesis involved in conjugation with cellular fusion	gene_03255	0.0183513	0.0319992
	GO:0005978	5	1	glycogen biosynthetic process	gene_08832	0.0183513	0.0319992
	GO:0006106	5	1	fumarate metabolic process	gene_02368	0.0183513	0.0319992
	GO:0006108	5	1	malate metabolic process	gene_08089	0.0183513	0.0319992
	GO:0006275	5	1	regulation of DNA replication	gene_07230	0.0183513	0.0319992
	GO:0006688	5	1	glycosphingolipid biosynthetic process	gene_10215	0.0183513	0.0319992
	GO:0006790	5	1	sulfur compound metabolic process	gene_00158	0.0183513	0.0319992
	GO:0007096	5	1	regulation of exit from mitosis	gene_07174	0.0183513	0.0319992
	GO:0007231	5	1	osmosensory signaling pathway	gene_01014	0.0183513	0.0319992
	GO:0007232	5	1	osmosensory signaling pathway via Sho1 osmosensor	gene_07174	0.0183513	0.0319992
	GO:0008090	5	1	retrograde axonal transport	gene_01018	0.0183513	0.0319992
	GO:0008272	5	1	sulfate transport	gene_08843	0.0183513	0.0319992
	GO:0009064	5	1	glutamine family amino acid metabolic process	gene_07373	0.0183513	0.0319992
	GO:0010043	5	1	response to zinc ion	gene_01541	0.0183513	0.0319992
	GO:0019344	5	1	cysteine biosynthetic process	gene_06929	0.0183513	0.0319992
	GO:0019346	5	1	transsulfuration	gene_06929	0.0183513	0.0319992
	GO:0030846	5	1	termination of RNA polymerase II transcription, poly(A)-coupled	gene_04541	0.0183513	0.0319992
	GO:0030866	5	1	cortical actin cytoskeleton organization	gene_07387	0.0183513	0.0319992
	GO:0032995	5	1	regulation of fungal-type cell wall biogenesis	gene_03594	0.0183513	0.0319992
	GO:0036091	5	1	positive regulation of transcription from RNA polymerase II promoter in response to oxidative stress	gene_01014	0.0183513	0.0319992
	GO:0042128	5	1	nitrate assimilation	gene_00158	0.0183513	0.0319992
	GO:0043618	5	1	regulation of transcription from RNA polymerase II promoter in response to stress	gene_10563	0.0183513	0.0319992
	GO:0046827	5	1	positive regulation of protein export from nucleus	gene_01071	0.0183513	0.0319992
	GO:0048017	5	1	inositol lipid-mediated signaling	gene_07728	0.0183513	0.0319992
	GO:0051598	5	1	meiotic recombination checkpoint	gene_06885	0.0183513	0.0319992
	GO:0061077	5	1	chaperone-mediated protein folding	gene_01993	0.0183513	0.0319992
	GO:0070676	5	1	intralumenal vesicle formation	gene_07230	0.0183513	0.0319992
	GO:0070814	5	1	hydrogen sulfide biosynthetic process	gene_03728	0.0183513	0.0319992
	GO:0071578	5	1	zinc ion import across plasma membrane	gene_01541	0.0183513	0.0319992
	GO:0071970	5	1	fungal-type cell wall (1->3)-beta-D-glucan biosynthetic process	gene_10556	0.0183513	0.0319992
	GO:0090029	5	1	negative regulation of pheromone-dependent signal transduction involved in conjugation with cellular fusion	gene_08692	0.0183513	0.0319992
	GO:0090053	5	1	positive regulation of chromatin silencing at centromere	gene_10563	0.0183513	0.0319992
	GO:0098703	5	1	calcium ion import across plasma membrane	gene_03594	0.0183513	0.0319992
	GO:1902358	5	1	sulfate transmembrane transport	gene_08843	0.0183513	0.0319992
	GO:2000134	5	1	negative regulation of G1/S transition of mitotic cell cycle	gene_00215	0.0183513	0.0319992
	GO:2001165	5	1	positive regulation of phosphorylation of RNA polymerase II C-terminal domain serine 2 residues	gene_01014	0.0183513	0.0319992
	GO:0001174	4	2	transcriptional start site selection at RNA polymerase II promoter	gene_07383;gene_04541	0.000346665	0.00200012
	GO:0007188	4	2	adenylate cyclase-modulating G protein-coupled receptor signaling pathway	gene_01012;gene_07387	0.000346665	0.00200012
	GO:0031321	4	2	ascospore-type prospore assembly	gene_10314;gene_07231	0.000346665	0.00200012
	GO:0044237	4	2	cellular metabolic process	gene_06479;gene_06383	0.000346665	0.00200012
	GO:0000742	4	1	karyogamy involved in conjugation with cellular fusion	gene_07391	0.0113459	0.0222198
	GO:0001666	4	1	response to hypoxia	gene_10313	0.0113459	0.0222198
	GO:0001678	4	1	cellular glucose homeostasis	gene_09024	0.0113459	0.0222198
	GO:0005997	4	1	xylulose metabolic process	gene_06300	0.0113459	0.0222198
	GO:0006066	4	1	alcohol metabolic process	gene_04245	0.0113459	0.0222198
	GO:0006101	4	1	citrate metabolic process	gene_03208	0.0113459	0.0222198
	GO:0006481	4	1	C-terminal protein methylation	gene_06685	0.0113459	0.0222198
	GO:0006675	4	1	mannosyl-inositol phosphorylceramide metabolic process	gene_10215	0.0113459	0.0222198
	GO:0006835	4	1	dicarboxylic acid transport	gene_08843	0.0113459	0.0222198
	GO:0006839	4	1	mitochondrial transport	gene_08579	0.0113459	0.0222198
	GO:0007329	4	1	positive regulation of transcription from RNA polymerase II promoter by pheromones	gene_04891	0.0113459	0.0222198
	GO:0008615	4	1	pyridoxine biosynthetic process	gene_08802	0.0113459	0.0222198
	GO:0009074	4	1	aromatic amino acid family catabolic process	gene_07382	0.0113459	0.0222198
	GO:0009395	4	1	phospholipid catabolic process	gene_07728	0.0113459	0.0222198
	GO:0009814	4	1	defense response, incompatible interaction	gene_04412	0.0113459	0.0222198
	GO:0010255	4	1	glucose mediated signaling pathway	gene_01012	0.0113459	0.0222198
	GO:0010520	4	1	regulation of reciprocal meiotic recombination	gene_01014	0.0113459	0.0222198
	GO:0015696	4	1	ammonium transport	gene_01074	0.0113459	0.0222198
	GO:0016075	4	1	rRNA catabolic process	gene_07765	0.0113459	0.0222198
	GO:0019379	4	1	sulfate assimilation, phosphoadenylyl sulfate reduction by phosphoadenylyl-sulfate reductase (thioredoxin)	gene_07044	0.0113459	0.0222198
	GO:0019933	4	1	cAMP-mediated signaling	gene_07387	0.0113459	0.0222198
	GO:0030497	4	1	fatty acid elongation	gene_04897	0.0113459	0.0222198
	GO:0030838	4	1	positive regulation of actin filament polymerization	gene_07387	0.0113459	0.0222198
	GO:0031670	4	1	cellular response to nutrient	gene_01014	0.0113459	0.0222198
	GO:0032874	4	1	positive regulation of stress-activated MAPK cascade	gene_03157	0.0113459	0.0222198
	GO:0032955	4	1	regulation of division septum assembly	gene_03255	0.0113459	0.0222198
	GO:0034475	4	1	U4 snRNA 3'-end processing	gene_07765	0.0113459	0.0222198
	GO:0034644	4	1	cellular response to UV	gene_07728	0.0113459	0.0222198
	GO:0035335	4	1	peptidyl-tyrosine dephosphorylation	gene_02187	0.0113459	0.0222198
	GO:0035376	4	1	sterol import	gene_07174	0.0113459	0.0222198
	GO:0038202	4	1	TORC1 signaling	gene_04315	0.0113459	0.0222198
	GO:0042981	4	1	regulation of apoptotic process	gene_07740	0.0113459	0.0222198
	GO:0045948	4	1	positive regulation of translational initiation	gene_06646	0.0113459	0.0222198
	GO:0046020	4	1	negative regulation of transcription from RNA polymerase II promoter by pheromones	gene_04891	0.0113459	0.0222198
	GO:0046352	4	1	disaccharide catabolic process	gene_07974	0.0113459	0.0222198
	GO:0046578	4	1	regulation of Ras protein signal transduction	gene_07387	0.0113459	0.0222198
	GO:0046907	4	1	intracellular transport	gene_06358	0.0113459	0.0222198
	GO:0051445	4	1	regulation of meiotic cell cycle	gene_01014	0.0113459	0.0222198
	GO:0051999	4	1	mannosyl-inositol phosphorylceramide biosynthetic process	gene_10215	0.0113459	0.0222198
	GO:0060257	4	1	negative regulation of flocculation	gene_07330	0.0113459	0.0222198
	GO:0070649	4	1	formin-nucleated actin cable assembly	gene_06358	0.0113459	0.0222198
	GO:0070988	4	1	demethylation	gene_06409	0.0113459	0.0222198
	GO:0072488	4	1	ammonium transmembrane transport	gene_01074	0.0113459	0.0222198
	GO:0080040	4	1	positive regulation of cellular response to phosphate starvation	gene_10563	0.0113459	0.0222198
	GO:0098789	4	1	pre-mRNA cleavage required for polyadenylation	gene_04541	0.0113459	0.0222198
	GO:0099097	4	1	prospore membrane biogenesis	gene_10314	0.0113459	0.0222198
	GO:0120162	4	1	positive regulation of cold-induced thermogenesis	gene_01018	0.0113459	0.0222198
	GO:1990961	4	1	drug transmembrane export	gene_03087	0.0113459	0.0222198
	GO:0042177	3	2	negative regulation of protein catabolic process	gene_06358;gene_08396	8.966e-05	0.000546787
	GO:1900406	3	2	regulation of conjugation with cellular fusion by regulation of transcription from RNA polymerase II promoter	gene_06336;gene_06318	8.966e-05	0.000546787
	GO:1902625	3	2	negative regulation of induction of conjugation with cellular fusion by negative regulation of transcription from RNA polymerase II promoter	gene_06336;gene_06318	8.966e-05	0.000546787
	GO:0000050	3	1	urea cycle	gene_00882	0.00584628	0.0135188
	GO:0000737	3	1	DNA catabolic process, endonucleolytic	gene_06691	0.00584628	0.0135188
	GO:0000918	3	1	division septum site selection	gene_03365	0.00584628	0.0135188
	GO:0002027	3	1	regulation of heart rate	gene_07740	0.00584628	0.0135188
	GO:0002949	3	1	tRNA threonylcarbamoyladenosine modification	gene_05366	0.00584628	0.0135188
	GO:0005980	3	1	glycogen catabolic process	gene_08832	0.00584628	0.0135188
	GO:0005987	3	1	sucrose catabolic process	gene_07974	0.00584628	0.0135188
	GO:0006038	3	1	cell wall chitin biosynthetic process	gene_07330	0.00584628	0.0135188
	GO:0006432	3	1	phenylalanyl-tRNA aminoacylation	gene_08842	0.00584628	0.0135188
	GO:0006673	3	1	inositol phosphoceramide metabolic process	gene_00104	0.00584628	0.0135188
	GO:0006820	3	1	anion transport	gene_02891	0.00584628	0.0135188
	GO:0006909	3	1	phagocytosis	gene_07387	0.00584628	0.0135188
	GO:0006935	3	1	chemotaxis	gene_07387	0.00584628	0.0135188
	GO:0007169	3	1	transmembrane receptor protein tyrosine kinase signaling pathway	gene_04945	0.00584628	0.0135188
	GO:0007286	3	1	spermatid development	gene_01018	0.00584628	0.0135188
	GO:0007323	3	1	peptide pheromone maturation	gene_06685	0.00584628	0.0135188
	GO:0007616	3	1	long-term memory	gene_10313	0.00584628	0.0135188
	GO:0008298	3	1	intracellular mRNA localization	gene_02587	0.00584628	0.0135188
	GO:0008612	3	1	peptidyl-lysine modification to peptidyl-hypusine	gene_08918	0.00584628	0.0135188
	GO:0009070	3	1	serine family amino acid biosynthetic process	gene_02617	0.00584628	0.0135188
	GO:0015811	3	1	L-cystine transport	gene_08000	0.00584628	0.0135188
	GO:0015883	3	1	FAD transport	gene_03594	0.00584628	0.0135188
	GO:0018106	3	1	peptidyl-histidine phosphorylation	gene_05038	0.00584628	0.0135188
	GO:0019220	3	1	regulation of phosphate metabolic process	gene_07728	0.00584628	0.0135188
	GO:0019358	3	1	nicotinate nucleotide salvage	gene_10498	0.00584628	0.0135188
	GO:0019363	3	1	pyridine nucleotide biosynthetic process	gene_10498	0.00584628	0.0135188
	GO:0030474	3	1	spindle pole body duplication	gene_00380	0.00584628	0.0135188
	GO:0031365	3	1	N-terminal protein amino acid modification	gene_08083	0.00584628	0.0135188
	GO:0031452	3	1	negative regulation of heterochromatin assembly	gene_06885	0.00584628	0.0135188
	GO:0034217	3	1	ascospore wall chitin biosynthetic process	gene_03365	0.00584628	0.0135188
	GO:0034394	3	1	protein localization to cell surface	gene_07740	0.00584628	0.0135188
	GO:0034427	3	1	nuclear-transcribed mRNA catabolic process, exonucleolytic, 3'-5'	gene_07765	0.00584628	0.0135188
	GO:0034476	3	1	U5 snRNA 3'-end processing	gene_07765	0.00584628	0.0135188
	GO:0034614	3	1	cellular response to reactive oxygen species	gene_07044	0.00584628	0.0135188
	GO:0034729	3	1	histone H3-K79 methylation	gene_06885	0.00584628	0.0135188
	GO:0035871	3	1	protein K11-linked deubiquitination	gene_05591	0.00584628	0.0135188
	GO:0042732	3	1	D-xylose metabolic process	gene_06300	0.00584628	0.0135188
	GO:0042744	3	1	hydrogen peroxide catabolic process	gene_07044	0.00584628	0.0135188
	GO:0042779	3	1	tRNA 3'-trailer cleavage	gene_02480	0.00584628	0.0135188
	GO:0042823	3	1	pyridoxal phosphate biosynthetic process	gene_08802	0.00584628	0.0135188
	GO:0043408	3	1	regulation of MAPK cascade	gene_07174	0.00584628	0.0135188
	GO:0046855	3	1	inositol phosphate dephosphorylation	gene_02187	0.00584628	0.0135188
	GO:0051403	3	1	stress-activated MAPK cascade	gene_01014	0.00584628	0.0135188
	GO:0055117	3	1	regulation of cardiac muscle contraction	gene_07740	0.00584628	0.0135188
	GO:0070478	3	1	nuclear-transcribed mRNA catabolic process, 3'-5' exonucleolytic nonsense-mediated decay	gene_07765	0.00584628	0.0135188
	GO:0070879	3	1	fungal-type cell wall beta-glucan metabolic process	gene_02910	0.00584628	0.0135188
	GO:0070911	3	1	global genome nucleotide-excision repair	gene_06885	0.00584628	0.0135188
	GO:0071039	3	1	nuclear polyadenylation-dependent CUT catabolic process	gene_07765	0.00584628	0.0135188
	GO:0071051	3	1	polyadenylation-dependent snoRNA 3'-end processing	gene_07765	0.00584628	0.0135188
	GO:0071467	3	1	cellular response to pH	gene_06717	0.00584628	0.0135188
	GO:0086004	3	1	regulation of cardiac muscle cell contraction	gene_07740	0.00584628	0.0135188
	GO:0090282	3	1	positive regulation of transcription involved in G2/M transition of mitotic cell cycle	gene_02507	0.00584628	0.0135188
	GO:1900429	3	1	negative regulation of filamentous growth of a population of unicellular organisms	gene_07330	0.00584628	0.0135188
	GO:1902475	3	1	L-alpha-amino acid transmembrane transport	gene_08000	0.00584628	0.0135188
	GO:1902981	3	1	synthesis of RNA primer involved in mitotic DNA replication	gene_07485	0.00584628	0.0135188
	GO:1903068	3	1	positive regulation of protein localization to cell tip	gene_07372	0.00584628	0.0135188
	GO:1903078	3	1	positive regulation of protein localization to plasma membrane	gene_07372	0.00584628	0.0135188
	GO:1903710	3	1	spermine transmembrane transport	gene_01247	0.00584628	0.0135188
	GO:1904082	3	1	pyrimidine nucleobase transmembrane transport	gene_00161	0.00584628	0.0135188
	GO:1990872	3	1	negative regulation of sterol import by negative regulation of transcription from RNA polymerase II promoter	gene_07174	0.00584628	0.0135188
	GO:0005977	2	2	glycogen metabolic process	gene_04805;gene_05286	0	0
	GO:0071423	2	2	malate transmembrane transport	gene_01643;gene_08843	0	0
	GO:0000743	2	1	nuclear migration involved in conjugation with cellular fusion	gene_04606	0.00200853	0.00620484
	GO:0001080	2	1	nitrogen catabolite activation of transcription from RNA polymerase II promoter	gene_09613	0.00200853	0.00620484
	GO:0001751	2	1	compound eye photoreceptor cell differentiation	gene_04945	0.00200853	0.00620484
	GO:0001878	2	1	response to yeast	gene_01779	0.00200853	0.00620484
	GO:0006011	2	1	UDP-glucose metabolic process	gene_04805	0.00200853	0.00620484
	GO:0006085	2	1	acetyl-CoA biosynthetic process	gene_03208	0.00200853	0.00620484
	GO:0006308	2	1	DNA catabolic process	gene_06691	0.00200853	0.00620484
	GO:0006421	2	1	asparaginyl-tRNA aminoacylation	gene_05106	0.00200853	0.00620484
	GO:0006471	2	1	protein ADP-ribosylation	gene_06298	0.00200853	0.00620484
	GO:0006564	2	1	L-serine biosynthetic process	gene_02617	0.00200853	0.00620484
	GO:0007189	2	1	adenylate cyclase-activating G protein-coupled receptor signaling pathway	gene_01012	0.00200853	0.00620484
	GO:0007420	2	1	brain development	gene_10313	0.00200853	0.00620484
	GO:0009061	2	1	anaerobic respiration	gene_09027	0.00200853	0.00620484
	GO:0009313	2	1	oligosaccharide catabolic process	gene_07974	0.00200853	0.00620484
	GO:0009816	2	1	defense response to bacterium, incompatible interaction	gene_04412	0.00200853	0.00620484
	GO:0009968	2	1	negative regulation of signal transduction	gene_06201	0.00200853	0.00620484
	GO:0010590	2	1	regulation of septum digestion after cytokinesis	gene_06646	0.00200853	0.00620484
	GO:0010846	2	1	activation of reciprocal meiotic recombination	gene_01014	0.00200853	0.00620484
	GO:0010881	2	1	regulation of cardiac muscle contraction by regulation of the release of sequestered calcium ion	gene_07740	0.00200853	0.00620484
	GO:0010882	2	1	regulation of cardiac muscle contraction by calcium ion signaling	gene_07740	0.00200853	0.00620484
	GO:0010992	2	1	ubiquitin recycling	gene_07230	0.00200853	0.00620484
	GO:0015729	2	1	oxaloacetate transport	gene_08843	0.00200853	0.00620484
	GO:0015810	2	1	aspartate transmembrane transport	gene_08579	0.00200853	0.00620484
	GO:0015813	2	1	L-glutamate transmembrane transport	gene_08579	0.00200853	0.00620484
	GO:0019343	2	1	cysteine biosynthetic process via cystathionine	gene_06929	0.00200853	0.00620484
	GO:0019730	2	1	antimicrobial humoral response	gene_04945	0.00200853	0.00620484
	GO:0019953	2	1	sexual reproduction	gene_04891	0.00200853	0.00620484
	GO:0020012	2	1	evasion or tolerance of host immune response	gene_02587	0.00200853	0.00620484
	GO:0031454	2	1	regulation of extent of heterochromatin assembly	gene_06209	0.00200853	0.00620484
	GO:0031494	2	1	regulation of mating type switching	gene_02507	0.00200853	0.00620484
	GO:0031564	2	1	transcription antitermination	gene_04541	0.00200853	0.00620484
	GO:0032878	2	1	regulation of establishment or maintenance of cell polarity	gene_08597	0.00200853	0.00620484
	GO:0032959	2	1	inositol trisphosphate biosynthetic process	gene_07728	0.00200853	0.00620484
	GO:0033211	2	1	adiponectin-activated signaling pathway	gene_01724	0.00200853	0.00620484
	GO:0033292	2	1	T-tubule organization	gene_07740	0.00200853	0.00620484
	GO:0034225	2	1	regulation of transcription from RNA polymerase II promoter in response to zinc ion starvation	gene_05023	0.00200853	0.00620484
	GO:0034473	2	1	U1 snRNA 3'-end processing	gene_07765	0.00200853	0.00620484
	GO:0036309	2	1	protein localization to M-band	gene_07740	0.00200853	0.00620484
	GO:0036371	2	1	protein localization to T-tubule	gene_07740	0.00200853	0.00620484
	GO:0043039	2	1	tRNA aminoacylation	gene_08842	0.00200853	0.00620484
	GO:0043268	2	1	positive regulation of potassium ion transport	gene_07740	0.00200853	0.00620484
	GO:0043326	2	1	chemotaxis to folate	gene_07387	0.00200853	0.00620484
	GO:0044247	2	1	cellular polysaccharide catabolic process	gene_07974	0.00200853	0.00620484
	GO:0045214	2	1	sarcomere organization	gene_04945	0.00200853	0.00620484
	GO:0046337	2	1	phosphatidylethanolamine metabolic process	gene_10313	0.00200853	0.00620484
	GO:0046474	2	1	glycerophospholipid biosynthetic process	gene_08283	0.00200853	0.00620484
	GO:0046579	2	1	positive regulation of Ras protein signal transduction	gene_07387	0.00200853	0.00620484
	GO:0046676	2	1	negative regulation of insulin secretion	gene_06298	0.00200853	0.00620484
	GO:0046959	2	1	habituation	gene_10313	0.00200853	0.00620484
	GO:0048477	2	1	oogenesis	gene_06358	0.00200853	0.00620484
	GO:0050896	2	1	response to stimulus	gene_07387	0.00200853	0.00620484
	GO:0051090	2	1	regulation of DNA-binding transcription factor activity	gene_05591	0.00200853	0.00620484
	GO:0051457	2	1	maintenance of protein location in nucleus	gene_01071	0.00200853	0.00620484
	GO:0051924	2	1	regulation of calcium ion transport	gene_07740	0.00200853	0.00620484
	GO:0051928	2	1	positive regulation of calcium ion transport	gene_07740	0.00200853	0.00620484
	GO:0055059	2	1	asymmetric neuroblast division	gene_10313	0.00200853	0.00620484
	GO:0060048	2	1	cardiac muscle contraction	gene_07740	0.00200853	0.00620484
	GO:0060361	2	1	flight	gene_04945	0.00200853	0.00620484
	GO:0061161	2	1	positive regulation of establishment of bipolar cell polarity regulating cell shape	gene_05018	0.00200853	0.00620484
	GO:0061454	2	1	release of sequestered calcium ion into cytosol by Golgi	gene_03594	0.00200853	0.00620484
	GO:0061692	2	1	cellular detoxification of hydrogen peroxide	gene_07044	0.00200853	0.00620484
	GO:0070417	2	1	cellular response to cold	gene_09426	0.00200853	0.00620484
	GO:0070536	2	1	protein K63-linked deubiquitination	gene_05591	0.00200853	0.00620484
	GO:0070791	2	1	cleistothecium development	gene_05969	0.00200853	0.00620484
	GO:0070898	2	1	RNA polymerase III preinitiation complex assembly	gene_01618	0.00200853	0.00620484
	GO:0070940	2	1	dephosphorylation of RNA polymerase II C-terminal domain	gene_04541	0.00200853	0.00620484
	GO:0070972	2	1	protein localization to endoplasmic reticulum	gene_07740	0.00200853	0.00620484
	GO:0071027	2	1	nuclear RNA surveillance	gene_07765	0.00200853	0.00620484
	GO:0071031	2	1	nuclear mRNA surveillance of mRNA 3'-end processing	gene_07765	0.00200853	0.00620484
	GO:0071285	2	1	cellular response to lithium ion	gene_07230	0.00200853	0.00620484
	GO:0071422	2	1	succinate transmembrane transport	gene_08843	0.00200853	0.00620484
	GO:0071474	2	1	cellular hyperosmotic response	gene_05038	0.00200853	0.00620484
	GO:0086014	2	1	atrial cardiac muscle cell action potential	gene_07740	0.00200853	0.00620484
	GO:0086015	2	1	SA node cell action potential	gene_07740	0.00200853	0.00620484
	GO:0086036	2	1	regulation of cardiac muscle cell membrane potential	gene_07740	0.00200853	0.00620484
	GO:0086066	2	1	atrial cardiac muscle cell to AV node cell communication	gene_07740	0.00200853	0.00620484
	GO:0086070	2	1	SA node cell to atrial cardiac muscle cell communication	gene_07740	0.00200853	0.00620484
	GO:0086091	2	1	regulation of heart rate by cardiac conduction	gene_07740	0.00200853	0.00620484
	GO:0090210	2	1	regulation of establishment of blood-brain barrier	gene_04945	0.00200853	0.00620484
	GO:0090235	2	1	regulation of metaphase plate congression	gene_01018	0.00200853	0.00620484
	GO:0098904	2	1	regulation of AV node cell action potential	gene_07740	0.00200853	0.00620484
	GO:0098907	2	1	regulation of SA node cell action potential	gene_07740	0.00200853	0.00620484
	GO:0098910	2	1	regulation of atrial cardiac muscle cell action potential	gene_07740	0.00200853	0.00620484
	GO:0099114	2	1	chromatin silencing at subtelomere	gene_06885	0.00200853	0.00620484
	GO:0140053	2	1	mitochondrial gene expression	gene_00582	0.00200853	0.00620484
	GO:1901018	2	1	positive regulation of potassium ion transmembrane transporter activity	gene_07740	0.00200853	0.00620484
	GO:1901019	2	1	regulation of calcium ion transmembrane transporter activity	gene_07740	0.00200853	0.00620484
	GO:1901021	2	1	positive regulation of calcium ion transmembrane transporter activity	gene_07740	0.00200853	0.00620484
	GO:1903067	2	1	negative regulation of protein localization to cell tip	gene_07372	0.00200853	0.00620484
	GO:1903147	2	1	negative regulation of autophagy of mitochondrion	gene_04945	0.00200853	0.00620484
	GO:1903694	2	1	positive regulation of mitotic G1 cell cycle arrest in response to nitrogen starvation	gene_01014	0.00200853	0.00620484
	GO:1903715	2	1	regulation of aerobic respiration	gene_01014	0.00200853	0.00620484
	GO:1990090	2	1	cellular response to nerve growth factor stimulus	gene_01018	0.00200853	0.00620484
	GO:1990355	2	1	L-methionine salvage from methionine sulphoxide	gene_07044	0.00200853	0.00620484
	GO:1990896	2	1	protein localization to cell cortex of cell tip	gene_04606	0.00200853	0.00620484
	GO:2000784	2	1	positive regulation of establishment of cell polarity regulating cell shape	gene_07372	0.00200853	0.00620484
	GO:2001216	2	1	negative regulation of hydroxymethylglutaryl-CoA reductase (NADPH) activity	gene_06119	0.00200853	0.00620484
	GO:2001257	2	1	regulation of cation channel activity	gene_07740	0.00200853	0.00620484
	GO:2001259	2	1	positive regulation of cation channel activity	gene_07740	0.00200853	0.00620484
	GO:0000097	1	1	sulfur amino acid biosynthetic process	gene_03728	0	0
	GO:0000128	1	1	flocculation	gene_07330	0	0
	GO:0000185	1	1	activation of MAPKKK activity	gene_07174	0	0
	GO:0000291	1	1	nuclear-transcribed mRNA catabolic process, exonucleolytic	gene_06646	0	0
	GO:0000820	1	1	regulation of glutamine family amino acid metabolic process	gene_06298	0	0
	GO:0001111	1	1	promoter clearance from RNA polymerase II promoter	gene_07383	0	0
	GO:0001195	1	1	maintenance of transcriptional fidelity during DNA-templated transcription elongation from RNA polymerase III promoter	gene_01618	0	0
	GO:0001197	1	1	positive regulation of mating-type specific transcription from RNA polymerase II promoter	gene_02507	0	0
	GO:0001198	1	1	negative regulation of mating-type specific transcription from RNA polymerase II promoter	gene_02507	0	0
	GO:0002092	1	1	positive regulation of receptor internalization	gene_01546	0	0
	GO:0005998	1	1	xylulose catabolic process	gene_06300	0	0
	GO:0006065	1	1	UDP-glucuronate biosynthetic process	gene_03010	0	0
	GO:0006309	1	1	apoptotic DNA fragmentation	gene_06691	0	0
	GO:0006386	1	1	termination of RNA polymerase III transcription	gene_02480	0	0
	GO:0006846	1	1	acetate transport	gene_01074	0	0
	GO:0006847	1	1	plasma membrane acetate transport	gene_01074	0	0
	GO:0007213	1	1	G protein-coupled acetylcholine receptor signaling pathway	gene_06201	0	0
	GO:0007638	1	1	mechanosensory behavior	gene_10313	0	0
	GO:0008306	1	1	associative learning	gene_10313	0	0
	GO:0009302	1	1	snoRNA transcription	gene_04541	0	0
	GO:0009612	1	1	response to mechanical stimulus	gene_10313	0	0
	GO:0009757	1	1	hexose mediated signaling	gene_01012	0	0
	GO:0010200	1	1	response to chitin	gene_04412	0	0
	GO:0010667	1	1	negative regulation of cardiac muscle cell apoptotic process	gene_06298	0	0
	GO:0010895	1	1	negative regulation of ergosterol biosynthetic process	gene_06119	0	0
	GO:0010995	1	1	free ubiquitin chain depolymerization	gene_07230	0	0
	GO:0015709	1	1	thiosulfate transport	gene_08843	0	0
	GO:0015804	1	1	neutral amino acid transport	gene_08000	0	0
	GO:0016074	1	1	snoRNA metabolic process	gene_02475	0	0
	GO:0016319	1	1	mushroom body development	gene_10313	0	0
	GO:0031152	1	1	aggregation involved in sorocarp development	gene_07387	0	0
	GO:0032388	1	1	positive regulation of intracellular transport	gene_01018	0	0
	GO:0032468	1	1	Golgi calcium ion homeostasis	gene_02759	0	0
	GO:0033047	1	1	regulation of mitotic sister chromatid segregation	gene_05474	0	0
	GO:0033490	1	1	cholesterol biosynthetic process via lathosterol	gene_01779	0	0
	GO:0034247	1	1	snoRNA splicing	gene_02475	0	0
	GO:0034770	1	1	histone H4-K20 methylation	gene_09919	0	0
	GO:0034983	1	1	peptidyl-lysine deacetylation	gene_06298	0	0
	GO:0036001	1	1	'de novo' pyridoxal 5'-phosphate biosynthetic process	gene_08802	0	0
	GO:0036083	1	1	positive regulation of unsaturated fatty acid biosynthetic process by positive regulation of transcription from RNA polymerase II promoter	gene_09426	0	0
	GO:0040038	1	1	polar body extrusion after meiotic divisions	gene_06358	0	0
	GO:0042183	1	1	formate catabolic process	gene_07999	0	0
	GO:0042819	1	1	vitamin B6 biosynthetic process	gene_08802	0	0
	GO:0042906	1	1	xanthine transport	gene_00161	0	0
	GO:0043327	1	1	chemotaxis to cAMP	gene_07387	0	0
	GO:0043490	1	1	malate-aspartate shuttle	gene_08579	0	0
	GO:0043991	1	1	histone H2B-S14 phosphorylation	gene_07174	0	0
	GO:0044783	1	1	G1 DNA damage checkpoint	gene_06885	0	0
	GO:0045744	1	1	negative regulation of G protein-coupled receptor signaling pathway	gene_08692	0	0
	GO:0045848	1	1	positive regulation of nitrogen utilization	gene_09613	0	0
	GO:0046321	1	1	positive regulation of fatty acid oxidation	gene_01724	0	0
	GO:0046322	1	1	negative regulation of fatty acid oxidation	gene_06298	0	0
	GO:0046521	1	1	sphingoid catabolic process	gene_06645	0	0
	GO:0046889	1	1	positive regulation of lipid biosynthetic process	gene_06298	0	0
	GO:0051127	1	1	positive regulation of actin nucleation	gene_06358	0	0
	GO:0051293	1	1	establishment of spindle localization	gene_01018	0	0
	GO:0051295	1	1	establishment of meiotic spindle localization	gene_06358	0	0
	GO:0051452	1	1	intracellular pH reduction	gene_06880	0	0
	GO:0051758	1	1	homologous chromosome movement towards spindle pole involved in homologous chromosome segregation	gene_06358	0	0
	GO:0051983	1	1	regulation of chromosome segregation	gene_10563	0	0
	GO:0052036	1	1	negative regulation by symbiont of host inflammatory response	gene_00284	0	0
	GO:0060159	1	1	regulation of dopamine receptor signaling pathway	gene_06201	0	0
	GO:0060213	1	1	positive regulation of nuclear-transcribed mRNA poly(A) tail shortening	gene_06646	0	0
	GO:0061393	1	1	positive regulation of transcription from RNA polymerase II promoter in response to osmotic stress	gene_01158	0	0
	GO:0061572	1	1	actin filament bundle organization	gene_05018	0	0
	GO:0070145	1	1	mitochondrial asparaginyl-tRNA aminoacylation	gene_05106	0	0
	GO:0070156	1	1	mitochondrial phenylalanyl-tRNA aminoacylation	gene_08842	0	0
	GO:0070613	1	1	regulation of protein processing	gene_06717	0	0
	GO:0070778	1	1	L-aspartate transmembrane transport	gene_08579	0	0
	GO:0070994	1	1	detection of oxidative stress	gene_03157	0	0
	GO:0071469	1	1	cellular response to alkaline pH	gene_06717	0	0
	GO:0071964	1	1	establishment of cell polarity regulating cell shape	gene_04606	0	0
	GO:0071985	1	1	multivesicular body sorting pathway	gene_09026	0	0
	GO:0071998	1	1	ascospore release from ascus	gene_04834	0	0
	GO:0072350	1	1	tricarboxylic acid metabolic process	gene_06298	0	0
	GO:0072382	1	1	minus-end-directed vesicle transport along microtubule	gene_01018	0	0
	GO:0090501	1	1	RNA phosphodiester bond hydrolysis	gene_06691	0	0
	GO:0097394	1	1	telomeric repeat-containing RNA transcription by RNA polymerase II	gene_06646	0	0
	GO:0098704	1	1	carbohydrate import across plasma membrane	gene_01410	0	0
	GO:0098708	1	1	glucose import across plasma membrane	gene_01410	0	0
	GO:1900409	1	1	positive regulation of cellular response to oxidative stress	gene_07044	0	0
	GO:1900426	1	1	positive regulation of defense response to bacterium	gene_00069	0	0
	GO:1900430	1	1	positive regulation of filamentous growth of a population of unicellular organisms	gene_04895	0	0
	GO:1900442	1	1	positive regulation of filamentous growth of a population of unicellular organisms in response to neutral pH	gene_04895	0	0
	GO:1900445	1	1	positive regulation of filamentous growth of a population of unicellular organisms in response to biotic stimulus	gene_04895	0	0
	GO:1900465	1	1	negative regulation of arginine catabolic process by negative regulation of transcription from RNA polymerase II promoter	gene_02507	0	0
	GO:1900466	1	1	positive regulation of arginine biosynthetic process by positive regulation of transcription from RNA polymerase II promoter	gene_02507	0	0
	GO:1901714	1	1	positive regulation of urea catabolic process	gene_09613	0	0
	GO:1901717	1	1	positive regulation of gamma-aminobutyric acid catabolic process	gene_09613	0	0
	GO:1901891	1	1	regulation of cell septum assembly	gene_03255	0	0
	GO:1902356	1	1	oxaloacetate(2-) transmembrane transport	gene_08843	0	0
	GO:1902432	1	1	protein localization to division septum	gene_03255	0	0
	GO:1902603	1	1	carnitine transmembrane transport	gene_01009	0	0
	GO:1902610	1	1	response to N-phenylthiourea	gene_07387	0	0
	GO:1902616	1	1	acyl carnitine transmembrane transport	gene_01009	0	0
	GO:1903217	1	1	negative regulation of protein processing involved in protein targeting to mitochondrion	gene_06298	0	0
	GO:1903643	1	1	positive regulation of recombination hotspot binding	gene_01014	0	0
	GO:1903665	1	1	negative regulation of asexual reproduction	gene_07387	0	0
	GO:1904182	1	1	regulation of pyruvate dehydrogenase activity	gene_06298	0	0
	GO:1904332	1	1	negative regulation of error-prone translesion synthesis	gene_05591	0	0
	GO:1904524	1	1	negative regulation of DNA amplification	gene_10498	0	0
	GO:1905243	1	1	cellular response to 3,3',5-triiodo-L-thyronine	gene_01018	0	0
	GO:1905301	1	1	regulation of macropinocytosis	gene_07387	0	0
	GO:1905342	1	1	positive regulation of protein localization to kinetochore	gene_05474	0	0
	GO:1905691	1	1	lipid droplet disassembly	gene_04390	0	0
	GO:1905832	1	1	positive regulation of spindle assembly	gene_01018	0	0
	GO:1990522	1	1	tail spike morphogenesis	gene_01724	0	0
	GO:1990539	1	1	fructose import across plasma membrane	gene_01410	0	0
	GO:1990611	1	1	regulation of cytoplasmic translational initiation in response to stress	gene_01014	0	0
	GO:2000220	1	1	regulation of pseudohyphal growth	gene_04891	0	0
	GO:2000781	1	1	positive regulation of double-strand break repair	gene_06358	0	0
Cellular Component	GO:0005575	3016	142	cellular_component	gene_04669;gene_10629;gene_06160;gene_09866;gene_08917;gene_04898;gene_05533;gene_06769;gene_06025;gene_08765;gene_02280;gene_09952;gene_01296;gene_08922;gene_03390;gene_02300;gene_05288;gene_03728;gene_08410;gene_02966;gene_03070;gene_02861;gene_02099;gene_08411;gene_04862;gene_06049;gene_07446;gene_00155;gene_04460;gene_08083;gene_06009;gene_08364;gene_07390;gene_01382;gene_02890;gene_09014;gen…	0.212974	0.24337
	GO:0005634	1441	82	nucleus	gene_08180;gene_05069;gene_07728;gene_06300;gene_07640;gene_02587;gene_04805;gene_03658;gene_03208;gene_01712;gene_07312;gene_01494;gene_01158;gene_04945;gene_07383;gene_02550;gene_05591;gene_06929;gene_03616;gene_06358;gene_09442;gene_04383;gene_05023;gene_04315;gene_05824;gene_02307;gene_05366;gene_00215;gene_01136;gene_01071;gene_05143;gene_06209;gene_07244;gene_01030;gene_09426;gene_00590;gen…	0.0073499	0.0167652
	GO:0005737	982	45	cytoplasm	gene_00582;gene_00882;gene_07740;gene_07728;gene_10403;gene_08842;gene_08802;gene_02587;gene_04805;gene_04595;gene_01158;gene_06336;gene_06318;gene_01993;gene_04945;gene_02550;gene_05591;gene_06929;gene_08089;gene_06358;gene_08832;gene_09442;gene_04315;gene_02187;gene_05366;gene_01071;gene_09026;gene_04513;gene_10313;gene_01014;gene_01018;gene_03010;gene_02617;gene_07044;gene_04440;gene_07999;gen…	0.400037	0.424566
	GO:0016021	851	41	integral component of membrane	gene_04794;gene_01247;gene_04070;gene_05825;gene_07701;gene_07260;gene_01074;gene_05625;gene_00380;gene_05038;gene_06685;gene_06299;gene_01779;gene_06887;gene_07249;gene_01009;gene_03087;gene_08000;gene_00667;gene_06768;gene_06880;gene_10565;gene_00796;gene_08579;gene_06864;gene_04412;gene_06409;gene_07178;gene_01432;gene_05892;gene_07901;gene_02891;gene_04253;gene_01643;gene_01541;gene_01037;gen…	0.276471	0.30526
	GO:0005829	780	36	cytosol	gene_07373;gene_05069;gene_07728;gene_06300;gene_04805;gene_03208;gene_01993;gene_04945;gene_05591;gene_03616;gene_06358;gene_04315;gene_02187;gene_01071;gene_08979;gene_01012;gene_00590;gene_07485;gene_01546;gene_06646;gene_04594;gene_00023;gene_04606;gene_01014;gene_03010;gene_07044;gene_07999;gene_02368;gene_07387;gene_01737;gene_03399;gene_05474;gene_09024;gene_02507;gene_07974;gene_07231	0.384807	0.410484
	GO:0016020	512	30	membrane	gene_08175;gene_02141;gene_03656;gene_07740;gene_01074;gene_10556;gene_02350;gene_02151;gene_01779;gene_09639;gene_07249;gene_01009;gene_04244;gene_06880;gene_10565;gene_08579;gene_01012;gene_06409;gene_01432;gene_02759;gene_06691;gene_06072;gene_01037;gene_08843;gene_06288;gene_07387;gene_01724;gene_06717;gene_06201;gene_07440	0.0530326	0.0757517
	GO:0005739	511	25	mitochondrion	gene_01763;gene_06298;gene_00582;gene_07740;gene_01074;gene_08842;gene_10556;gene_02350;gene_02151;gene_06299;gene_01009;gene_10414;gene_04661;gene_08089;gene_08832;gene_03017;gene_08579;gene_04513;gene_01012;gene_06691;gene_00921;gene_08843;gene_05106;gene_02368;gene_00158	0.27867	0.307069
	GO:0005886	417	33	plasma membrane	gene_01247;gene_08175;gene_02141;gene_03656;gene_07740;gene_01074;gene_10556;gene_05018;gene_08000;gene_04436;gene_03594;gene_06358;gene_03926;gene_05366;gene_04412;gene_04513;gene_01012;gene_07058;gene_01546;gene_08283;gene_01541;gene_01910;gene_02248;gene_07387;gene_01724;gene_01737;gene_00069;gene_07174;gene_02547;gene_06717;gene_06201;gene_07440;gene_01410	0.000490606	0.0028168
	GO:0005783	303	14	endoplasmic reticulum	gene_04339;gene_08175;gene_02141;gene_03656;gene_04897;gene_03365;gene_03594;gene_06409;gene_07058;gene_02135;gene_01643;gene_04440;gene_01910;gene_06717	0.385025	0.410484
	GO:0005576	227	11	extracellular region	gene_07184;gene_02910;gene_10556;gene_02350;gene_02151;gene_01993;gene_01862;gene_08504;gene_04412;gene_03749;gene_01910	0.320992	0.349176
	GO:0005794	172	6	Golgi apparatus	gene_01247;gene_00104;gene_07058;gene_01546;gene_06288;gene_01410	0.658629	0.671175
	GO:0005730	145	5	nucleolus	gene_05069;gene_05591;gene_06358;gene_06747;gene_02480	0.638969	0.65454
	GO:0000790	142	5	nuclear chromatin	gene_10563;gene_01494;gene_07765;gene_02507;gene_01618	0.618658	0.635393
	GO:0005789	135	5	endoplasmic reticulum membrane	gene_06685;gene_01779;gene_06358;gene_06409;gene_07330	0.56889	0.586839
	GO:0000324	128	7	fungal-type vacuole	gene_01119;gene_07249;gene_01993;gene_02759;gene_04440;gene_01910;gene_00161	0.216379	0.246781
	GO:0000329	119	4	fungal-type vacuole membrane	gene_07249;gene_06768;gene_04253;gene_07231	0.623654	0.639965
	GO:0032153	111	4	cell division site	gene_07372;gene_01071;gene_03255;gene_02547	0.561346	0.580584
	GO:0005743	99	7	mitochondrial inner membrane	gene_04794;gene_06298;gene_01009;gene_08579;gene_06691;gene_01014;gene_08843	0.0760109	0.100522
	GO:0005759	88	4	mitochondrial matrix	gene_06298;gene_00582;gene_08842;gene_02368	0.360841	0.387509
	GO:0005768	87	2	endosome	gene_07230;gene_07740	0.755776	0.763561
	GO:0005887	71	7	integral component of plasma membrane	gene_01247;gene_07740;gene_03365;gene_03594;gene_02547;gene_00161;gene_01410	0.0137222	0.0263906
	GO:0005622	67	2	intracellular	gene_04987;gene_06072	0.584392	0.602302
	GO:0005654	62	5	nucleoplasm	gene_02307;gene_05366;gene_07391;gene_06747;gene_04891	0.0584786	0.081046
	GO:0005773	62	4	vacuole	gene_01119;gene_01074;gene_07249;gene_02248	0.144435	0.172065
	GO:0009986	62	3	cell surface	gene_02910;gene_05018;gene_00590	0.30273	0.330532
	GO:0005777	61	2	peroxisome	gene_05006;gene_10498	0.520258	0.542377
	GO:0031966	61	1	mitochondrial membrane	gene_00582	0.766229	0.772795
	GO:0005635	60	2	nuclear envelope	gene_00380;gene_01018	0.509058	0.532114
	GO:0071944	59	3	cell periphery	gene_02350;gene_02151;gene_01910	0.272244	0.302009
	GO:0009277	53	5	fungal-type cell wall	gene_02910;gene_10556;gene_02350;gene_02151;gene_01910	0.0304146	0.0489044
	GO:0051286	53	4	cell tip	gene_07372;gene_04606;gene_03255;gene_02547	0.0878739	0.112912
	GO:0005840	51	3	ribosome	gene_02350;gene_02151;gene_09787	0.194472	0.224687
	GO:0005758	49	2	mitochondrial intermembrane space	gene_01014;gene_00158	0.378318	0.404066
	GO:0044732	48	1	mitotic spindle pole body	gene_01071	0.641542	0.656034
	GO:0034399	46	1	nuclear periphery	gene_10556	0.618292	0.635393
	GO:0005935	45	4	cellular bud neck	gene_02587;gene_05018;gene_04513;gene_07330	0.0497434	0.0714872
	GO:0005774	43	2	vacuolar membrane	gene_01074;gene_07249	0.303715	0.3313
	GO:0030176	41	3	integral component of endoplasmic reticulum membrane	gene_04897;gene_09426;gene_03228	0.110242	0.138037
	GO:0005681	41	2	spliceosomal complex	gene_02307;gene_02475	0.278892	0.307069
	GO:0035861	41	1	site of double-strand break	gene_07485	0.555173	0.57521
	GO:0005615	38	1	extracellular space	gene_01119	0.513905	0.536229
	GO:0005856	36	2	cytoskeleton	gene_07740;gene_04594	0.218037	0.247951
	GO:0009536	36	2	plastid	gene_08504;gene_02248	0.218037	0.247951
	GO:0005938	35	2	cell cortex	gene_06358;gene_01018	0.206204	0.23771
	GO:0009507	35	2	chloroplast	gene_04661;gene_03017	0.206204	0.23771
	GO:0005643	35	1	nuclear pore	gene_00380	0.470194	0.493242
	GO:0031225	34	6	anchored component of membrane	gene_08175;gene_02141;gene_03656;gene_10556;gene_02350;gene_02151	0.000650533	0.00371688
	GO:0043332	34	2	mating projection tip	gene_03255;gene_07174	0.194525	0.224687
	GO:0010494	34	1	cytoplasmic stress granule	gene_02587	0.455109	0.478698
	GO:0000131	32	2	incipient cellular bud site	gene_08597;gene_07174	0.171705	0.203113
	GO:0000784	32	1	nuclear chromosome, telomeric region	gene_07485	0.424219	0.448612
	GO:0005628	29	2	prospore membrane	gene_10314;gene_07231	0.139108	0.167756
	GO:0005811	29	1	lipid droplet	gene_08283	0.376266	0.402239
	GO:0005618	28	4	cell wall	gene_10556;gene_02350;gene_02151;gene_01910	0.00741109	0.0167747
	GO:0048471	28	2	perinuclear region of cytoplasm	gene_07740;gene_06358	0.128756	0.155911
	GO:0005934	27	2	cellular bud tip	gene_04513;gene_01910	0.118694	0.145373
	GO:0005813	27	1	centrosome	gene_01018	0.3434	0.369791
	GO:0005874	27	1	microtubule	gene_01018	0.3434	0.369791
	GO:0051285	26	4	cell cortex of cell tip	gene_07372;gene_04436;gene_04606;gene_03255	0.00533821	0.0135188
	GO:0000932	25	2	P-body	gene_02587;gene_06646	0.0995196	0.12501
	GO:0031618	24	3	nuclear pericentric heterochromatin	gene_08047;gene_06209;gene_07244	0.0207954	0.0361006
	GO:0000778	23	1	condensed nuclear chromosome kinetochore	gene_07043	0.276268	0.30526
	GO:0045121	23	1	membrane raft	gene_10556	0.276268	0.30526
	GO:0072686	23	1	mitotic spindle	gene_03255	0.276268	0.30526
	GO:0005763	22	1	mitochondrial small ribosomal subunit	gene_10413	0.259353	0.288252
	GO:0046658	21	3	anchored component of plasma membrane	gene_08175;gene_02141;gene_03656	0.0130153	0.0251444
	GO:0000775	21	2	chromosome, centromeric region	gene_07043;gene_05143	0.0655014	0.0899593
	GO:0000328	21	1	fungal-type vacuole lumen	gene_01119	0.24245	0.272553
	GO:0005933	20	4	cellular bud	gene_08175;gene_02141;gene_03656;gene_02587	0.00156988	0.00620484
	GO:0005686	20	1	U2 snRNP	gene_02307	0.225598	0.255561
	GO:0032991	20	1	protein-containing complex	gene_03399	0.225598	0.255561
	GO:0005694	19	2	chromosome	gene_05143;gene_01618	0.05094	0.0728511
	GO:0000151	19	1	ubiquitin ligase complex	gene_08578	0.208838	0.238875
	GO:0016592	19	1	mediator complex	gene_07383	0.208838	0.238875
	GO:0030173	19	1	integral component of Golgi membrane	gene_00104	0.208838	0.238875
	GO:0000935	18	1	division septum	gene_03255	0.192217	0.222896
	GO:0030134	18	1	COPII-coated ER to Golgi transport vesicle	gene_10556	0.192217	0.222896
	GO:0030428	18	1	cell septum	gene_03365	0.192217	0.222896
	GO:0000124	17	1	SAGA complex	gene_04459	0.175785	0.206074
	GO:0000776	17	1	kinetochore	gene_05143	0.175785	0.206074
	GO:0005778	17	1	peroxisomal membrane	gene_01692	0.175785	0.206074
	GO:0005669	16	2	transcription factor TFIID complex	gene_07383;gene_04459	0.0324868	0.0515322
	GO:0031011	16	2	Ino80 complex	gene_10563;gene_07383	0.0324868	0.0515322
	GO:0031934	16	2	mating-type region heterochromatin	gene_06209;gene_07244	0.0324868	0.0515322
	GO:0000407	15	2	phagophore assembly site	gene_08581;gene_01493	0.0272812	0.0439261
	GO:0005764	15	1	lysosome	gene_07740	0.143706	0.171544
	GO:0015630	15	1	microtubule cytoskeleton	gene_07372	0.143706	0.171544
	GO:0034515	15	1	proteasome storage granule	gene_04963	0.143706	0.171544
	GO:0005685	14	1	U1 snRNP	gene_03419	0.128183	0.155698
	GO:1990707	13	2	nuclear subtelomeric heterochromatin	gene_06209;gene_07244	0.0183229	0.0319992
	GO:0000781	13	1	chromosome, telomeric region	gene_10498	0.113094	0.139238
	GO:0005666	13	1	RNA polymerase III complex	gene_02480	0.113094	0.139238
	GO:0030427	13	1	site of polarized growth	gene_03255	0.113094	0.139238
	GO:0005665	12	1	RNA polymerase II, core complex	gene_06646	0.0985138	0.124011
	GO:0005684	12	1	U2-type spliceosomal complex	gene_02475	0.0985138	0.124011
	GO:0005779	12	1	integral component of peroxisomal membrane	gene_01692	0.0985138	0.124011
	GO:0005819	12	1	spindle	gene_06358	0.0985138	0.124011
	GO:0009506	12	1	plasmodesma	gene_08504	0.0985138	0.124011
	GO:0005656	11	1	nuclear pre-replicative complex	gene_06747	0.0845233	0.108726
	GO:0005680	11	1	anaphase-promoting complex	gene_08047	0.0845233	0.108726
	GO:0005847	11	1	mRNA cleavage and polyadenylation specificity factor complex	gene_04541	0.0845233	0.108726
	GO:0031520	11	1	plasma membrane of cell tip	gene_03594	0.0845233	0.108726
	GO:0043025	11	1	neuronal cell body	gene_01018	0.0845233	0.108726
	GO:0005801	10	1	cis-Golgi network	gene_02759	0.0712098	0.094705
	GO:0008540	10	1	proteasome regulatory particle, base subcomplex	gene_04595	0.0712098	0.094705
	GO:0030659	10	1	cytoplasmic vesicle membrane	gene_06358	0.0712098	0.094705
	GO:0046695	10	1	SLIK (SAGA-like) complex	gene_04459	0.0712098	0.094705
	GO:0001411	9	2	hyphal tip	gene_05018;gene_03255	0.00615014	0.0140558
	GO:0005832	9	1	chaperonin-containing T-complex	gene_04594	0.0586671	0.081046
	GO:0016604	9	1	nuclear body	gene_07391	0.0586671	0.081046
	GO:0035838	9	1	growing cell tip	gene_02547	0.0586671	0.081046
	GO:0045335	9	1	phagocytic vesicle	gene_07387	0.0586671	0.081046
	GO:0009570	8	2	chloroplast stroma	gene_04661;gene_03017	0.00424009	0.0124144
	GO:0000178	8	1	exosome (RNase complex)	gene_07765	0.0469967	0.0677051
	GO:0000307	8	1	cyclin-dependent protein kinase holoenzyme complex	gene_08597	0.0469967	0.0677051
	GO:0015629	8	1	actin cytoskeleton	gene_06358	0.0469967	0.0677051
	GO:0016586	8	1	RSC-type complex	gene_04895	0.0469967	0.0677051
	GO:1902716	8	1	cell cortex of growing cell tip	gene_03255	0.0469967	0.0677051
	GO:0016514	7	2	SWI/SNF complex	gene_07383;gene_04895	0.00274075	0.00822925
	GO:0000176	7	1	nuclear exosome (RNase complex)	gene_07765	0.0363075	0.0547183
	GO:0000786	7	1	nucleosome	gene_06210	0.0363075	0.0547183
	GO:0005740	7	1	mitochondrial envelope	gene_08843	0.0363075	0.0547183
	GO:0005881	7	1	cytoplasmic microtubule	gene_01018	0.0363075	0.0547183
	GO:0016607	7	1	nuclear speck	gene_05366	0.0363075	0.0547183
	GO:0019774	7	1	proteasome core complex, beta-subunit complex	gene_04963	0.0363075	0.0547183
	GO:0032154	7	1	cleavage furrow	gene_03255	0.0363075	0.0547183
	GO:0033573	7	1	high-affinity iron permease complex	gene_07058	0.0363075	0.0547183
	GO:0042995	7	1	cell projection	gene_06201	0.0363075	0.0547183
	GO:1990429	7	1	peroxisomal importomer complex	gene_01692	0.0363075	0.0547183
	GO:0030018	6	2	Z disc	gene_07740;gene_04945	0.00161987	0.00620484
	GO:0035839	6	2	non-growing cell tip	gene_07372;gene_02547	0.00161987	0.00620484
	GO:0035840	6	2	old growing cell tip	gene_07372;gene_02547	0.00161987	0.00620484
	GO:0000177	6	1	cytoplasmic exosome (RNase complex)	gene_07765	0.026717	0.0432544
	GO:0000502	6	1	proteasome complex	gene_00379	0.026717	0.0432544
	GO:0005868	6	1	cytoplasmic dynein complex	gene_01018	0.026717	0.0432544
	GO:0009505	6	1	plant-type cell wall	gene_08504	0.026717	0.0432544
	GO:0030424	6	1	axon	gene_01018	0.026717	0.0432544
	GO:0030425	6	1	dendrite	gene_06201	0.026717	0.0432544
	GO:0031234	6	1	extrinsic component of cytoplasmic side of plasma membrane	gene_06201	0.026717	0.0432544
	GO:0031617	6	1	NMS complex	gene_07043	0.026717	0.0432544
	GO:0048188	6	1	Set1C/COMPASS complex	gene_08303	0.026717	0.0432544
	GO:0090726	6	1	cortical dynamic polarity patch	gene_03255	0.026717	0.0432544
	GO:0005834	5	3	heterotrimeric G-protein complex	gene_01012;gene_08692;gene_07387	1.925e-05	0.000119879
	GO:0000788	5	1	nuclear nucleosome	gene_06209	0.0183513	0.0319992
	GO:0005637	5	1	nuclear inner membrane	gene_06685	0.0183513	0.0319992
	GO:0030054	5	1	cell junction	gene_07740	0.0183513	0.0319992
	GO:0031463	5	1	Cul3-RING ubiquitin ligase complex	gene_08578	0.0183513	0.0319992
	GO:0032588	5	1	trans-Golgi network membrane	gene_10215	0.0183513	0.0319992
	GO:0033106	5	1	cis-Golgi network membrane	gene_10215	0.0183513	0.0319992
	GO:0000814	4	2	ESCRT II complex	gene_09026;gene_07391	0.000346665	0.00200012
	GO:0005621	4	2	cellular bud scar	gene_10556;gene_05018	0.000346665	0.00200012
	GO:0031430	4	2	M band	gene_07740;gene_04945	0.000346665	0.00200012
	GO:0014069	4	1	postsynaptic density	gene_07740	0.0113459	0.0222198
	GO:0030286	4	1	dynein complex	gene_01018	0.0113459	0.0222198
	GO:0031262	4	1	Ndc80 complex	gene_07043	0.0113459	0.0222198
	GO:0031982	4	1	vesicle	gene_07387	0.0113459	0.0222198
	GO:0035974	4	1	meiotic spindle pole body	gene_07043	0.0113459	0.0222198
	GO:0071005	4	1	U2-type precatalytic spliceosome	gene_02307	0.0113459	0.0222198
	GO:0071821	4	1	FANCM-MHF complex	gene_05143	0.0113459	0.0222198
	GO:0000408	3	1	EKC/KEOPS complex	gene_05366	0.00584628	0.0135188
	GO:0000936	3	1	primary cell septum	gene_10556	0.00584628	0.0135188
	GO:0005662	3	1	DNA replication factor A complex	gene_07485	0.00584628	0.0135188
	GO:0005674	3	1	transcription factor TFIIF complex	gene_07383	0.00584628	0.0135188
	GO:0005753	3	1	mitochondrial proton-transporting ATP synthase complex	gene_00667	0.00584628	0.0135188
	GO:0005797	3	1	Golgi medial cisterna	gene_02759	0.00584628	0.0135188
	GO:0005901	3	1	caveola	gene_02248	0.00584628	0.0135188
	GO:0014704	3	1	intercalated disc	gene_07740	0.00584628	0.0135188
	GO:0030315	3	1	T-tubule	gene_07740	0.00584628	0.0135188
	GO:0031672	3	1	A band	gene_07740	0.00584628	0.0135188
	GO:0033100	3	1	NuA3 histone acetyltransferase complex	gene_07383	0.00584628	0.0135188
	GO:0034456	3	1	UTP-C complex	gene_05069	0.00584628	0.0135188
	GO:0042383	3	1	sarcolemma	gene_07740	0.00584628	0.0135188
	GO:1904511	3	1	cytoplasmic microtubule plus-end	gene_04606	0.00584628	0.0135188
	GO:1990468	3	1	NuA3b histone acetyltransferase complex	gene_07383	0.00584628	0.0135188
	GO:0005689	2	1	U12-type spliceosomal complex	gene_02307	0.00200853	0.00620484
	GO:0016324	2	1	apical plasma membrane	gene_08000	0.00200853	0.00620484
	GO:0031500	2	1	Tea1 cell-end complex	gene_07372	0.00200853	0.00620484
	GO:0032545	2	1	CURI complex	gene_05069	0.00200853	0.00620484
	GO:0032580	2	1	Golgi cisterna membrane	gene_06880	0.00200853	0.00620484
	GO:0033565	2	1	ESCRT-0 complex	gene_07231	0.00200853	0.00620484
	GO:0033620	2	1	Mei2 nuclear dot complex	gene_07391	0.00200853	0.00620484
	GO:0035097	2	1	histone methyltransferase complex	gene_04543	0.00200853	0.00620484
	GO:0043034	2	1	costamere	gene_07740	0.00200853	0.00620484
	GO:0043204	2	1	perikaryon	gene_06201	0.00200853	0.00620484
	GO:0043240	2	1	Fanconi anaemia nuclear complex	gene_05143	0.00200853	0.00620484
	GO:0045202	2	1	synapse	gene_07740	0.00200853	0.00620484
	GO:0045211	2	1	postsynaptic membrane	gene_07740	0.00200853	0.00620484
	GO:0070762	2	1	nuclear pore transmembrane ring	gene_00380	0.00200853	0.00620484
	GO:1903600	2	1	glutaminase complex	gene_08802	0.00200853	0.00620484
	GO:1990316	2	1	Atg1/ULK1 kinase complex	gene_08581	0.00200853	0.00620484
	GO:1990467	2	1	NuA3a histone acetyltransferase complex	gene_07383	0.00200853	0.00620484
	GO:1990752	2	1	microtubule end	gene_04606	0.00200853	0.00620484
	GO:0002177	1	1	manchette	gene_01018	0	0
	GO:0005902	1	1	microvillus	gene_06358	0	0
	GO:0005951	1	1	carbamoyl-phosphate synthase complex	gene_00882	0	0
	GO:0009344	1	1	nitrite reductase complex [NAD(P)H]	gene_09027	0	0
	GO:0009365	1	1	protein histidine kinase complex	gene_03157	0	0
	GO:0030175	1	1	filopodium	gene_01018	0	0
	GO:0031526	1	1	brush border membrane	gene_08000	0	0
	GO:0032809	1	1	neuronal cell body membrane	gene_06201	0	0
	GO:0045239	1	1	tricarboxylic acid cycle enzyme complex	gene_02368	0	0
	GO:0070916	1	1	inositol phosphoceramide synthase complex	gene_00104	0	0
	GO:0097221	1	1	M/G1 phase-specific MADS box-forkhead transcription factor complex	gene_01494	0	0
	GO:1902929	1	1	plasma membrane of growing cell tip	gene_05018	0	0
	GO:1905721	1	1	mitotic spindle astral microtubule end	gene_04606	0	0
	GO:1905759	1	1	post-anaphase array microtubule	gene_04606	0	0
	GO:1990526	1	1	Ste12p-Dig1p-Dig2p complex	gene_04891	0	0
	GO:1990527	1	1	Tec1p-Ste12p-Dig1p complex	gene_04891	0	0
Molecular Function	GO:0003674	2499	131	molecular_function	gene_04794;gene_10629;gene_06160;gene_09866;gene_01763;gene_05825;gene_06298;gene_00582;gene_05533;gene_05069;gene_08175;gene_02141;gene_03656;gene_07701;gene_07260;gene_08765;gene_09952;gene_03390;gene_02300;gene_08581;gene_03070;gene_06049;gene_07446;gene_00155;gene_06009;gene_05018;gene_09639;gene_01382;gene_06887;gene_02890;gene_10314;gene_04436;gene_05326;gene_07043;gene_10809;gene_03489;gen…	0.0130315	0.0251444
	GO:0005524	668	27	ATP binding	gene_10563;gene_04070;gene_00882;gene_06300;gene_01296;gene_05625;gene_08842;gene_05038;gene_04595;gene_03208;gene_03087;gene_03017;gene_04315;gene_00215;gene_01071;gene_10741;gene_04594;gene_01014;gene_01018;gene_00921;gene_05106;gene_05474;gene_09024;gene_07174;gene_04895;gene_03157;gene_07440	0.678676	0.689217
	GO:0008270	565	33	zinc ion binding	gene_04898;gene_06298;gene_07640;gene_08411;gene_04460;gene_03658;gene_01712;gene_07312;gene_09014;gene_01993;gene_01692;gene_09189;gene_05824;gene_01136;gene_04846;gene_08406;gene_01030;gene_06345;gene_03086;gene_00258;gene_03847;gene_06211;gene_03056;gene_02480;gene_05848;gene_07764;gene_02475;gene_01737;gene_07382;gene_09613;gene_10297;gene_07445;gene_10301	0.0473916	0.0681906
	GO:0046872	389	21	metal ion binding	gene_08180;gene_04805;gene_03208;gene_07249;gene_04661;gene_01692;gene_08089;gene_05023;gene_05366;gene_04412;gene_01012;gene_04543;gene_06691;gene_03847;gene_02480;gene_07764;gene_04440;gene_09613;gene_10498;gene_07231;gene_07440	0.15488	0.184322
	GO:0000166	384	16	nucleotide binding	gene_04669;gene_04070;gene_05625;gene_08842;gene_05038;gene_04595;gene_03087;gene_06336;gene_06318;gene_10741;gene_01012;gene_00921;gene_03419;gene_07174;gene_03031;gene_07440	0.559975	0.579675
	GO:0003677	383	29	DNA binding	gene_08180;gene_10563;gene_08917;gene_08922;gene_02861;gene_07640;gene_03658;gene_07312;gene_01158;gene_02550;gene_01136;gene_05143;gene_06209;gene_01030;gene_09600;gene_06345;gene_03086;gene_04834;gene_04997;gene_06210;gene_08551;gene_03056;gene_05848;gene_04895;gene_09613;gene_02507;gene_10297;gene_04891;gene_01618	0.00197323	0.00620484
	GO:0005515	374	17	protein binding	gene_08180;gene_07372;gene_07740;gene_07728;gene_01071;gene_06209;gene_07244;gene_07058;gene_06646;gene_04606;gene_01014;gene_01018;gene_07044;gene_06288;gene_07387;gene_07174;gene_03157	0.414011	0.438606
	GO:0016491	362	12	oxidoreductase activity	gene_03728;gene_08410;gene_10403;gene_01779;gene_10414;gene_08089;gene_08504;gene_07764;gene_03682;gene_07999;gene_09529;gene_09611	0.834586	0.838146
	GO:0003824	314	18	catalytic activity	gene_08175;gene_02141;gene_03656;gene_02280;gene_03728;gene_03679;gene_06929;gene_08832;gene_01308;gene_09938;gene_09475;gene_06479;gene_04219;gene_06383;gene_02617;gene_04537;gene_03521;gene_10498	0.112935	0.139238
	GO:0000981	283	16	DNA-binding transcription factor activity, RNA polymerase II-specific	gene_08180;gene_07640;gene_03658;gene_01712;gene_01494;gene_05824;gene_01136;gene_01030;gene_06345;gene_03086;gene_03056;gene_05848;gene_07382;gene_09613;gene_02507;gene_10297	0.134625	0.16285
	GO:0016787	264	11	hydrolase activity	gene_08175;gene_02141;gene_03656;gene_01119;gene_02099;gene_04595;gene_08832;gene_02187;gene_06691;gene_00379;gene_10498	0.524656	0.546478
	GO:0003676	221	16	nucleic acid binding	gene_04669;gene_10563;gene_05288;gene_07312;gene_09014;gene_00284;gene_06947;gene_00258;gene_06691;gene_06211;gene_02480;gene_05106;gene_03419;gene_04895;gene_03031;gene_10301	0.0209058	0.0362387
	GO:0016740	215	8	transferase activity	gene_05038;gene_10556;gene_08832;gene_05366;gene_10215;gene_02617;gene_07174;gene_07440	0.633442	0.649444
	GO:0003723	182	9	RNA binding	gene_06336;gene_06318;gene_04945;gene_02307;gene_06947;gene_06646;gene_00023;gene_03367;gene_03031	0.300583	0.328492
	GO:0016887	153	4	ATPase activity	gene_10563;gene_04070;gene_05625;gene_00921	0.823353	0.827571
	GO:0004674	139	6	protein serine/threonine kinase activity	gene_04315;gene_00215;gene_01071;gene_05474;gene_07174;gene_07440	0.43295	0.457435
	GO:0003735	134	2	structural constituent of ribosome	gene_10413;gene_09787	0.944027	0.944027
	GO:0017111	118	5	nucleoside-triphosphatase activity	gene_04070;gene_05625;gene_04595;gene_10741;gene_00921	0.437206	0.461104
	GO:0005506	116	2	iron ion binding	gene_03728;gene_01779	0.898694	0.900224
	GO:0005525	112	2	GTP binding	gene_01012;gene_06072	0.884921	0.887939
	GO:0004672	110	3	protein kinase activity	gene_00215;gene_07174;gene_07440	0.734205	0.743043
	GO:0020037	104	4	heme binding	gene_03728;gene_09027;gene_03157;gene_00158	0.502901	0.526146
	GO:0016301	98	3	kinase activity	gene_05038;gene_07174;gene_07440	0.647246	0.661292
	GO:0050660	95	4	flavin adenine dinucleotide binding	gene_10403;gene_09898;gene_10414;gene_09027	0.423846	0.448612
	GO:0022857	94	3	transmembrane transporter activity	gene_10565;gene_08579;gene_00161	0.614433	0.632157
	GO:0003924	85	2	GTPase activity	gene_01012;gene_06072	0.741612	0.749895
	GO:0008233	77	2	peptidase activity	gene_01119;gene_00379	0.678423	0.689217
	GO:0042626	77	2	ATPase activity, coupled to transmembrane movement of substances	gene_04070;gene_05625	0.678423	0.689217
	GO:0005509	70	2	calcium ion binding	gene_07728;gene_02930	0.614344	0.632157
	GO:0003682	65	5	chromatin binding	gene_08917;gene_08922;gene_05143;gene_04459;gene_06747	0.0704152	0.094705
	GO:0030170	65	2	pyridoxal phosphate binding	gene_06929;gene_06252	0.563622	0.582426
	GO:0004252	64	3	serine-type endopeptidase activity	gene_06025;gene_01119;gene_02966	0.323265	0.351323
	GO:0051082	62	4	unfolded protein binding	gene_07390;gene_06119;gene_04594;gene_07330	0.144435	0.172065
	GO:0043565	61	8	sequence-specific DNA binding	gene_02861;gene_01158;gene_02550;gene_04834;gene_04997;gene_03847;gene_02507;gene_01618	0.00146404	0.00620484
	GO:0003700	60	7	DNA-binding transcription factor activity	gene_02861;gene_01158;gene_02550;gene_04834;gene_04997;gene_08551;gene_04891	0.00504833	0.0135188
	GO:0003729	53	3	mRNA binding	gene_02587;gene_08979;gene_07174	0.213271	0.243472
	GO:0000978	51	3	RNA polymerase II proximal promoter sequence-specific DNA binding	gene_01494;gene_05023;gene_02507	0.194472	0.224687
	GO:0004386	49	1	helicase activity	gene_04895	0.652743	0.665753
	GO:0061630	42	3	ubiquitin protein ligase activity	gene_09442;gene_02475;gene_03399	0.117786	0.144863
	GO:0042803	42	1	protein homodimerization activity	gene_09026	0.568368	0.586815
	GO:0016798	41	4	hydrolase activity, acting on glycosyl bonds	gene_08175;gene_02141;gene_03656;gene_08832	0.0352274	0.0547183
	GO:0003697	41	2	single-stranded DNA binding	gene_07485;gene_06646	0.278892	0.307069
	GO:0003690	40	1	double-stranded DNA binding	gene_05143	0.541696	0.562237
	GO:0016757	39	1	transferase activity, transferring glycosyl groups	gene_08832	0.527939	0.548926
	GO:0008236	38	1	serine-type peptidase activity	gene_01119	0.513905	0.536229
	GO:0050661	35	1	NADP binding	gene_09027	0.470194	0.493242
	GO:0005096	33	2	GTPase activator activity	gene_01737;gene_06201	0.18302	0.214129
	GO:0004806	33	1	triglyceride lipase activity	gene_08114	0.43978	0.463403
	GO:0005543	32	5	phospholipid binding	gene_04447;gene_04846;gene_08406;gene_03255;gene_01737	0.00263352	0.00805104
	GO:0004842	32	2	ubiquitin-protein transferase activity	gene_01692;gene_04412	0.171705	0.203113
	GO:0003777	31	1	microtubule motor activity	gene_01018	0.408437	0.43309
	GO:0016829	30	1	lyase activity	gene_06929	0.392447	0.417264
	GO:0005507	29	2	copper ion binding	gene_08504;gene_08551	0.139108	0.167756
	GO:0051287	28	4	NAD binding	gene_04460;gene_08089;gene_03010;gene_07999	0.00741109	0.0167747
	GO:0001228	28	2	DNA-binding transcription activator activity, RNA polymerase II-specific	gene_01494;gene_02507	0.128756	0.155911
	GO:0000049	28	1	tRNA binding	gene_08842	0.359911	0.386863
	GO:0016791	27	3	phosphatase activity	gene_02187;gene_03604;gene_04440	0.0309262	0.0495915
	GO:0046982	27	3	protein heterodimerization activity	gene_05143;gene_04459;gene_06210	0.0309262	0.0495915
	GO:0004175	27	2	endopeptidase activity	gene_05591;gene_04963	0.118694	0.145373
	GO:0003899	26	2	DNA-directed 5'-3' RNA polymerase activity	gene_06646;gene_02480	0.108942	0.136555
	GO:0005198	26	1	structural molecule activity	gene_09026	0.326755	0.353809
	GO:0008017	26	1	microtubule binding	gene_04606	0.326755	0.353809
	GO:0030674	25	3	protein binding, bridging	gene_07372;gene_07740;gene_06409	0.0239044	0.041194
	GO:0010181	25	2	FMN binding	gene_03728;gene_09611	0.0995196	0.12501
	GO:0003684	24	3	damaged DNA binding	gene_06408;gene_07485;gene_08396	0.0207954	0.0361006
	GO:0019901	24	2	protein kinase binding	gene_04945;gene_08597	0.0904458	0.11609
	GO:0015171	24	1	amino acid transmembrane transporter activity	gene_08000	0.293161	0.320679
	GO:0016616	23	2	oxidoreductase activity, acting on the CH-OH group of donors, NAD or NADP as acceptor	gene_07764;gene_07999	0.0817395	0.107494
	GO:0043130	23	2	ubiquitin binding	gene_07231;gene_08396	0.0817395	0.107494
	GO:0051536	23	2	iron-sulfur cluster binding	gene_03728;gene_09027	0.0817395	0.107494
	GO:0008081	22	2	phosphoric diester hydrolase activity	gene_04862;gene_04340	0.0734189	0.0972037
	GO:0003713	22	1	transcription coactivator activity	gene_09613	0.259353	0.288252
	GO:0003779	22	1	actin binding	gene_06358	0.259353	0.288252
	GO:0008080	22	1	N-acetyltransferase activity	gene_02475	0.259353	0.288252
	GO:0016746	22	1	transferase activity, transferring acyl groups	gene_05366	0.259353	0.288252
	GO:0032266	21	1	phosphatidylinositol-3-phosphate binding	gene_07231	0.24245	0.272553
	GO:0003688	20	1	DNA replication origin binding	gene_02507	0.225598	0.255561
	GO:0004843	19	4	thiol-dependent ubiquitin-specific protease activity	gene_07230;gene_05591;gene_02214;gene_00379	0.00122184	0.00620484
	GO:0050662	19	2	coenzyme binding	gene_06479;gene_06383	0.05094	0.0728511
	GO:0003887	19	1	DNA-directed DNA polymerase activity	gene_06408	0.208838	0.238875
	GO:0004713	18	2	protein tyrosine kinase activity	gene_00215;gene_05474	0.0443251	0.065872
	GO:0031625	18	2	ubiquitin protein ligase binding	gene_04595;gene_01546	0.0443251	0.065872
	GO:0046983	18	2	protein dimerization activity	gene_01158;gene_02507	0.0443251	0.065872
	GO:0008289	18	1	lipid binding	gene_00667	0.192217	0.222896
	GO:0016627	18	1	oxidoreductase activity, acting on the CH-CH group of donors	gene_10414	0.192217	0.222896
	GO:0017056	18	1	structural constituent of nuclear pore	gene_00380	0.192217	0.222896
	GO:0004721	17	3	phosphoprotein phosphatase activity	gene_04661;gene_02187;gene_04541	0.00596194	0.0137323
	GO:0008134	17	3	transcription factor binding	gene_05591;gene_02507;gene_01618	0.00596194	0.0137323
	GO:0000030	17	1	mannosyltransferase activity	gene_10215	0.175785	0.206074
	GO:0016874	17	1	ligase activity	gene_08842	0.175785	0.206074
	GO:0051015	17	1	actin filament binding	gene_08285	0.175785	0.206074
	GO:0001227	16	2	DNA-binding transcription repressor activity, RNA polymerase II-specific	gene_05023;gene_02507	0.0324868	0.0515322
	GO:0004722	16	2	protein serine/threonine phosphatase activity	gene_04440;gene_04541	0.0324868	0.0515322
	GO:0004040	16	1	amidase activity	gene_03017	0.159595	0.189167
	GO:0008324	15	2	cation transmembrane transporter activity	gene_06299;gene_07249	0.0272812	0.0439261
	GO:0015035	15	1	protein disulfide oxidoreductase activity	gene_07044	0.143706	0.171544
	GO:0042393	15	1	histone binding	gene_06210	0.143706	0.171544
	GO:0004298	14	1	threonine-type endopeptidase activity	gene_04963	0.128183	0.155698
	GO:0031072	13	2	heat shock protein binding	gene_01296;gene_07390	0.0183229	0.0319992
	GO:0031369	13	1	translation initiation factor binding	gene_06646	0.113094	0.139238
	GO:0004725	12	2	protein tyrosine phosphatase activity	gene_02187;gene_04541	0.0145711	0.0278865
	GO:0004338	12	1	glucan exo-1,3-beta-glucosidase activity	gene_02910	0.0985138	0.124011
	GO:0004518	12	1	nuclease activity	gene_06691	0.0985138	0.124011
	GO:0004812	12	1	aminoacyl-tRNA ligase activity	gene_08842	0.0985138	0.124011
	GO:0015297	12	1	antiporter activity	gene_08843	0.0985138	0.124011
	GO:0042910	12	1	xenobiotic transmembrane transporter activity	gene_01247	0.0985138	0.124011
	GO:0008484	11	2	sulfuric ester hydrolase activity	gene_01308;gene_09938	0.0112988	0.0222198
	GO:0001056	11	1	RNA polymerase III activity	gene_02480	0.0845233	0.108726
	GO:0004519	11	1	endonuclease activity	gene_06691	0.0845233	0.108726
	GO:0008238	11	1	exopeptidase activity	gene_06025	0.0845233	0.108726
	GO:0016846	11	1	carbon-sulfur lyase activity	gene_06929	0.0845233	0.108726
	GO:0008496	10	3	mannan endo-1,6-alpha-mannosidase activity	gene_08175;gene_02141;gene_03656	0.000675285	0.00383966
	GO:0036459	10	2	thiol-dependent ubiquitinyl hydrolase activity	gene_05591;gene_00379	0.0084965	0.0191212
	GO:0003727	10	1	single-stranded RNA binding	gene_06646	0.0712098	0.094705
	GO:0004521	10	1	endoribonuclease activity	gene_06691	0.0712098	0.094705
	GO:0008047	10	1	enzyme activator activity	gene_07387	0.0712098	0.094705
	GO:0008422	10	1	beta-glucosidase activity	gene_00590	0.0712098	0.094705
	GO:0008559	10	1	xenobiotic transmembrane transporting ATPase activity	gene_03087	0.0712098	0.094705
	GO:0016279	10	1	protein-lysine N-methyltransferase activity	gene_08364	0.0712098	0.094705
	GO:0016772	10	1	transferase activity, transferring phosphorus-containing groups	gene_05038	0.0712098	0.094705
	GO:0000155	9	4	phosphorelay sensor kinase activity	gene_05038;gene_04446;gene_04797;gene_03157	1.9219e-05	0.000119879
	GO:0004540	9	2	ribonuclease activity	gene_02587;gene_06691	0.00615014	0.0140558
	GO:0042124	9	2	1,3-beta-glucanosyltransferase activity	gene_02910;gene_10556	0.00615014	0.0140558
	GO:0004100	9	1	chitin synthase activity	gene_03365	0.0586671	0.081046
	GO:0004197	9	1	cysteine-type endopeptidase activity	gene_05591	0.0586671	0.081046
	GO:0004712	9	1	protein serine/threonine/tyrosine kinase activity	gene_05474	0.0586671	0.081046
	GO:0005385	9	1	zinc ion transmembrane transporter activity	gene_01541	0.0586671	0.081046
	GO:0008240	9	1	tripeptidyl-peptidase activity	gene_06025	0.0586671	0.081046
	GO:0015116	9	1	sulfate transmembrane transporter activity	gene_08843	0.0586671	0.081046
	GO:0015616	9	1	DNA translocase activity	gene_07383	0.0586671	0.081046
	GO:0038023	9	1	signaling receptor activity	gene_01724	0.0586671	0.081046
	GO:0043138	9	1	3'-5' DNA helicase activity	gene_10563	0.0586671	0.081046
	GO:0044212	9	1	transcription regulatory region DNA binding	gene_02507	0.0586671	0.081046
	GO:0070006	8	2	metalloaminopeptidase activity	gene_04898;gene_01993	0.00424009	0.0124144
	GO:0004359	8	1	glutaminase activity	gene_08802	0.0469967	0.0677051
	GO:0004724	8	1	magnesium-dependent protein serine/threonine phosphatase activity	gene_04440	0.0469967	0.0677051
	GO:0008483	8	1	transaminase activity	gene_02617	0.0469967	0.0677051
	GO:0016251	8	1	RNA polymerase II general transcription initiation factor activity	gene_07383	0.0469967	0.0677051
	GO:0016538	8	1	cyclin-dependent protein serine/threonine kinase regulator activity	gene_08597	0.0469967	0.0677051
	GO:0030151	8	1	molybdenum ion binding	gene_00158	0.0469967	0.0677051
	GO:0035064	8	1	methylated histone binding	gene_07244	0.0469967	0.0677051
	GO:0060090	8	1	molecular adaptor activity	gene_04459	0.0469967	0.0677051
	GO:0005199	7	3	structural constituent of cell wall	gene_02350;gene_02151;gene_01910	0.000125366	0.000756698
	GO:0000156	7	2	phosphorelay response regulator activity	gene_04446;gene_04797	0.00274075	0.00822925
	GO:0008266	7	2	poly(U) RNA binding	gene_06336;gene_06318	0.00274075	0.00822925
	GO:0031491	7	2	nucleosome binding	gene_09919;gene_01618	0.00274075	0.00822925
	GO:0005089	7	1	Rho guanyl-nucleotide exchange factor activity	gene_03255	0.0363075	0.0547183
	GO:0005262	7	1	calcium channel activity	gene_03594	0.0363075	0.0547183
	GO:0005355	7	1	glucose transmembrane transporter activity	gene_01410	0.0363075	0.0547183
	GO:0015386	7	1	potassium:proton antiporter activity	gene_07249	0.0363075	0.0547183
	GO:0051010	7	1	microtubule plus-end binding	gene_04606	0.0363075	0.0547183
	GO:0070403	7	1	NAD+ binding	gene_06298	0.0363075	0.0547183
	GO:0048037	6	2	cofactor binding	gene_03208;gene_04440	0.00161987	0.00620484
	GO:0000014	6	1	single-stranded DNA endodeoxyribonuclease activity	gene_06691	0.026717	0.0432544
	GO:0000977	6	1	RNA polymerase II regulatory region sequence-specific DNA binding	gene_01158	0.026717	0.0432544
	GO:0000987	6	1	proximal promoter sequence-specific DNA binding	gene_02507	0.026717	0.0432544
	GO:0001102	6	1	RNA polymerase II activating transcription factor binding	gene_02507	0.026717	0.0432544
	GO:0003730	6	1	mRNA 3'-UTR binding	gene_02587	0.026717	0.0432544
	GO:0004340	6	1	glucokinase activity	gene_09024	0.026717	0.0432544
	GO:0015369	6	1	calcium:proton antiporter activity	gene_07249	0.026717	0.0432544
	GO:0005310	5	2	dicarboxylic acid transmembrane transporter activity	gene_08579;gene_08843	0.000837787	0.0045864
	GO:0008301	5	2	DNA binding, bending	gene_01158;gene_01618	0.000837787	0.0045864
	GO:0003756	5	1	protein disulfide isomerase activity	gene_04339	0.0183513	0.0319992
	GO:0005384	5	1	manganese ion transmembrane transporter activity	gene_02759	0.0183513	0.0319992
	GO:0008234	5	1	cysteine-type peptidase activity	gene_00379	0.0183513	0.0319992
	GO:0008519	5	1	ammonium transmembrane transporter activity	gene_01074	0.0183513	0.0319992
	GO:0015036	5	1	disulfide oxidoreductase activity	gene_00069	0.0183513	0.0319992
	GO:0016818	5	1	hydrolase activity, acting on acid anhydrides, in phosphorus-containing anhydrides	gene_04895	0.0183513	0.0319992
	GO:0042973	5	1	glucan endo-1,3-beta-D-glucosidase activity	gene_02910	0.0183513	0.0319992
	GO:0043047	5	1	single-stranded telomeric DNA binding	gene_03367	0.0183513	0.0319992
	GO:0045505	5	1	dynein intermediate chain binding	gene_01018	0.0183513	0.0319992
	GO:0031493	4	2	nucleosomal histone binding	gene_07244;gene_06885	0.000346665	0.00200012
	GO:0000007	4	1	low-affinity zinc ion transmembrane transporter activity	gene_01541	0.0113459	0.0222198
	GO:0000297	4	1	spermine transmembrane transporter activity	gene_01247	0.0113459	0.0222198
	GO:0001664	4	1	G protein-coupled receptor binding	gene_01012	0.0113459	0.0222198
	GO:0004103	4	1	choline kinase activity	gene_10313	0.0113459	0.0222198
	GO:0004305	4	1	ethanolamine kinase activity	gene_10313	0.0113459	0.0222198
	GO:0004396	4	1	hexokinase activity	gene_09024	0.0113459	0.0222198
	GO:0004435	4	1	phosphatidylinositol phospholipase C activity	gene_07728	0.0113459	0.0222198
	GO:0004673	4	1	protein histidine kinase activity	gene_05038	0.0113459	0.0222198
	GO:0005353	4	1	fructose transmembrane transporter activity	gene_01410	0.0113459	0.0222198
	GO:0005536	4	1	glucose binding	gene_09024	0.0113459	0.0222198
	GO:0008865	4	1	fructokinase activity	gene_09024	0.0113459	0.0222198
	GO:0015093	4	1	ferrous iron transmembrane transporter activity	gene_07058	0.0113459	0.0222198
	GO:0015184	4	1	L-cystine transmembrane transporter activity	gene_08000	0.0113459	0.0222198
	GO:0015459	4	1	potassium channel regulator activity	gene_07740	0.0113459	0.0222198
	GO:0019158	4	1	mannokinase activity	gene_09024	0.0113459	0.0222198
	GO:0031683	4	1	G-protein beta/gamma-subunit complex binding	gene_01012	0.0113459	0.0222198
	GO:0048365	4	1	Rac GTPase binding	gene_07174	0.0113459	0.0222198
	GO:0050567	4	1	glutaminyl-tRNA synthase (glutamine-hydrolyzing) activity	gene_03017	0.0113459	0.0222198
	GO:0051117	4	1	ATPase binding	gene_07740	0.0113459	0.0222198
	GO:0015140	3	2	malate transmembrane transporter activity	gene_01643;gene_08843	8.966e-05	0.000546787
	GO:0000900	3	1	translation repressor activity, mRNA regulatory element binding	gene_02587	0.00584628	0.0135188
	GO:0001139	3	1	RNA polymerase II complex recruiting activity	gene_07383	0.00584628	0.0135188
	GO:0003950	3	1	NAD+ ADP-ribosyltransferase activity	gene_06298	0.00584628	0.0135188
	GO:0004088	3	1	carbamoyl-phosphate synthase (glutamine-hydrolyzing) activity	gene_00882	0.00584628	0.0135188
	GO:0004143	3	1	diacylglycerol kinase activity	gene_03228	0.00584628	0.0135188
	GO:0004430	3	1	1-phosphatidylinositol 4-kinase activity	gene_06288	0.00584628	0.0135188
	GO:0004556	3	1	alpha-amylase activity	gene_07974	0.00584628	0.0135188
	GO:0004558	3	1	alpha-1,4-glucosidase activity	gene_07974	0.00584628	0.0135188
	GO:0004575	3	1	sucrose alpha-glucosidase activity	gene_07974	0.00584628	0.0135188
	GO:0004671	3	1	protein C-terminal S-isoprenylcysteine carboxyl O-methyltransferase activity	gene_06685	0.00584628	0.0135188
	GO:0004707	3	1	MAP kinase activity	gene_01014	0.00584628	0.0135188
	GO:0004826	3	1	phenylalanine-tRNA ligase activity	gene_08842	0.00584628	0.0135188
	GO:0005313	3	1	L-glutamate transmembrane transporter activity	gene_08579	0.00584628	0.0135188
	GO:0008418	3	1	protein-N-terminal asparagine amidohydrolase activity	gene_08083	0.00584628	0.0135188
	GO:0008420	3	1	RNA polymerase II CTD heptapeptide repeat phosphatase activity	gene_04541	0.00584628	0.0135188
	GO:0008569	3	1	ATP-dependent microtubule motor activity, minus-end-directed	gene_01018	0.00584628	0.0135188
	GO:0015230	3	1	FAD transmembrane transporter activity	gene_03594	0.00584628	0.0135188
	GO:0016209	3	1	antioxidant activity	gene_07044	0.00584628	0.0135188
	GO:0032450	3	1	maltose alpha-glucosidase activity	gene_07974	0.00584628	0.0135188
	GO:0032454	3	1	histone demethylase activity (H3-K9 specific)	gene_04543	0.00584628	0.0135188
	GO:0035251	3	1	UDP-glucosyltransferase activity	gene_05286	0.00584628	0.0135188
	GO:0043546	3	1	molybdopterin cofactor binding	gene_00158	0.00584628	0.0135188
	GO:0044325	3	1	ion channel binding	gene_07740	0.00584628	0.0135188
	GO:0044654	3	1	starch alpha-glucosidase activity	gene_07974	0.00584628	0.0135188
	GO:0050265	3	1	RNA uridylyltransferase activity	gene_01071	0.00584628	0.0135188
	GO:0051864	3	1	histone demethylase activity (H3-K36 specific)	gene_04543	0.00584628	0.0135188
	GO:0070773	3	1	protein-N-terminal glutamine amidohydrolase activity	gene_08083	0.00584628	0.0135188
	GO:0080146	3	1	L-cysteine desulfhydrase activity	gene_06929	0.00584628	0.0135188
	GO:0001103	2	1	RNA polymerase II repressing transcription factor binding	gene_02507	0.00200853	0.00620484
	GO:0001135	2	1	RNA polymerase II transcription regulator recruiting activity	gene_09613	0.00200853	0.00620484
	GO:0003841	2	1	1-acylglycerol-3-phosphate O-acyltransferase activity	gene_08283	0.00200853	0.00620484
	GO:0003878	2	1	ATP citrate synthase activity	gene_03208	0.00200853	0.00620484
	GO:0003935	2	1	GTP cyclohydrolase II activity	gene_03616	0.00200853	0.00620484
	GO:0004026	2	1	alcohol O-acetyltransferase activity	gene_04245	0.00200853	0.00620484
	GO:0004049	2	1	anthranilate synthase activity	gene_05969	0.00200853	0.00620484
	GO:0004069	2	1	L-aspartate:2-oxoglutarate aminotransferase activity	gene_06252	0.00200853	0.00620484
	GO:0004123	2	1	cystathionine gamma-lyase activity	gene_06929	0.00200853	0.00620484
	GO:0004354	2	1	glutamate dehydrogenase (NADP+) activity	gene_07373	0.00200853	0.00620484
	GO:0004470	2	1	malic enzyme activity	gene_08089	0.00200853	0.00620484
	GO:0004471	2	1	malate dehydrogenase (decarboxylating) (NAD+) activity	gene_08089	0.00200853	0.00620484
	GO:0004574	2	1	oligo-1,6-glucosidase activity	gene_07974	0.00200853	0.00620484
	GO:0004711	2	1	ribosomal protein S6 kinase activity	gene_04315	0.00200853	0.00620484
	GO:0004816	2	1	asparagine-tRNA ligase activity	gene_05106	0.00200853	0.00620484
	GO:0005351	2	1	carbohydrate:proton symporter activity	gene_01410	0.00200853	0.00620484
	GO:0008308	2	1	voltage-gated anion channel activity	gene_06880	0.00200853	0.00620484
	GO:0008413	2	1	8-oxo-7,8-dihydroguanosine triphosphate pyrophosphatase activity	gene_05006	0.00200853	0.00620484
	GO:0008466	2	1	glycogenin glucosyltransferase activity	gene_05286	0.00200853	0.00620484
	GO:0008482	2	1	sulfite oxidase activity	gene_00158	0.00200853	0.00620484
	GO:0008948	2	1	oxaloacetate decarboxylase activity	gene_08089	0.00200853	0.00620484
	GO:0015131	2	1	oxaloacetate transmembrane transporter activity	gene_08843	0.00200853	0.00620484
	GO:0015141	2	1	succinate transmembrane transporter activity	gene_08843	0.00200853	0.00620484
	GO:0015179	2	1	L-amino acid transmembrane transporter activity	gene_08000	0.00200853	0.00620484
	GO:0015183	2	1	L-aspartate transmembrane transporter activity	gene_08579	0.00200853	0.00620484
	GO:0032452	2	1	histone demethylase activity	gene_04543	0.00200853	0.00620484
	GO:0033934	2	1	glucan 1,4-alpha-maltotriohydrolase activity	gene_07974	0.00200853	0.00620484
	GO:0044653	2	1	dextrin alpha-glucosidase activity	gene_07974	0.00200853	0.00620484
	GO:0045503	2	1	dynein light chain binding	gene_01018	0.00200853	0.00620484
	GO:0047768	2	1	carboxy-cis,cis-muconate cyclase activity	gene_07184	0.00200853	0.00620484
	GO:0047804	2	1	cysteine-S-conjugate beta-lyase activity	gene_06929	0.00200853	0.00620484
	GO:0048027	2	1	mRNA 5'-UTR binding	gene_02587	0.00200853	0.00620484
	GO:0051959	2	1	dynein light intermediate chain binding	gene_01018	0.00200853	0.00620484
	GO:0061840	2	1	high-affinity ferrous iron transmembrane transporter activity	gene_07058	0.00200853	0.00620484
	GO:0101005	2	1	ubiquitinyl hydrolase activity	gene_05591	0.00200853	0.00620484
	GO:1990446	2	1	U1 snRNP binding	gene_03031	0.00200853	0.00620484
	GO:0000248	1	1	C-5 sterol desaturase activity	gene_01779	0	0
	GO:0003979	1	1	UDP-glucose 6-dehydrogenase activity	gene_03010	0	0
	GO:0003983	1	1	UTP:glucose-1-phosphate uridylyltransferase activity	gene_04805	0	0
	GO:0004134	1	1	4-alpha-glucanotransferase activity	gene_08832	0	0
	GO:0004135	1	1	amylo-alpha-1,6-glucosidase activity	gene_08832	0	0
	GO:0004333	1	1	fumarate hydratase activity	gene_02368	0	0
	GO:0004352	1	1	glutamate dehydrogenase (NAD+) activity	gene_07373	0	0
	GO:0004399	1	1	histidinol dehydrogenase activity	gene_04460	0	0
	GO:0004473	1	1	malate dehydrogenase (decarboxylating) (NADP+) activity	gene_08089	0	0
	GO:0004520	1	1	endodeoxyribonuclease activity	gene_06691	0	0
	GO:0004529	1	1	exodeoxyribonuclease activity	gene_06691	0	0
	GO:0004635	1	1	phosphoribosyl-AMP cyclohydrolase activity	gene_04460	0	0
	GO:0004636	1	1	phosphoribosyl-ATP diphosphatase activity	gene_04460	0	0
	GO:0004648	1	1	O-phospho-L-serine:2-oxoglutarate aminotransferase activity	gene_02617	0	0
	GO:0004848	1	1	ureidoglycolate hydrolase activity	gene_06769	0	0
	GO:0004856	1	1	xylulokinase activity	gene_06300	0	0
	GO:0005476	1	1	carnitine:acyl carnitine antiporter activity	gene_01009	0	0
	GO:0008349	1	1	MAP kinase kinase kinase kinase activity	gene_07174	0	0
	GO:0008863	1	1	formate dehydrogenase (NAD+) activity	gene_07999	0	0
	GO:0008936	1	1	nicotinamidase activity	gene_10498	0	0
	GO:0008942	1	1	nitrite reductase [NAD(P)H] activity	gene_09027	0	0
	GO:0015085	1	1	calcium ion transmembrane transporter activity	gene_02759	0	0
	GO:0015117	1	1	thiosulfate transmembrane transporter activity	gene_08843	0	0
	GO:0015123	1	1	acetate transmembrane transporter activity	gene_01074	0	0
	GO:0015149	1	1	hexose transmembrane transporter activity	gene_01410	0	0
	GO:0015175	1	1	neutral amino acid transmembrane transporter activity	gene_08000	0	0
	GO:0016462	1	1	pyrophosphatase activity	gene_05006	0	0
	GO:0016909	1	1	SAP kinase activity	gene_01014	0	0
	GO:0018812	1	1	3-hydroxyacyl-CoA dehydratase activity	gene_04897	0	0
	GO:0019001	1	1	guanyl nucleotide binding	gene_01012	0	0
	GO:0019238	1	1	cyclohydrolase activity	gene_03616	0	0
	GO:0031151	1	1	histone methyltransferase activity (H3-K79 specific)	gene_06885	0	0
	GO:0031682	1	1	G-protein gamma-subunit binding	gene_07387	0	0
	GO:0034038	1	1	deoxyhypusine synthase activity	gene_08918	0	0
	GO:0034979	1	1	NAD-dependent protein deacetylase activity	gene_06298	0	0
	GO:0035939	1	1	microsatellite binding	gene_03367	0	0
	GO:0042605	1	1	peptide antigen binding	gene_08000	0	0
	GO:0042799	1	1	histone methyltransferase activity (H4-K20 specific)	gene_09919	0	0
	GO:0042907	1	1	xanthine transmembrane transporter activity	gene_00161	0	0
	GO:0044025	1	1	histone kinase activity (H2B-S14 specific)	gene_07174	0	0
	GO:0044377	1	1	RNA polymerase II proximal promoter sequence-specific DNA binding, bending	gene_02507	0	0
	GO:0044540	1	1	L-cystine L-cysteine-lyase (deaminating)	gene_06929	0	0
	GO:0045140	1	1	inositol phosphoceramide synthase activity	gene_00104	0	0
	GO:0047708	1	1	biotinidase activity	gene_06298	0	0
	GO:0050289	1	1	spermidine dehydrogenase activity	gene_08918	0	0
	GO:0050385	1	1	ureidoglycolate lyase activity	gene_06769	0	0
	GO:0052845	1	1	inositol-5-diphosphate-1,2,3,4,6-pentakisphosphate diphosphatase activity	gene_02187	0	0
	GO:0052847	1	1	inositol-1,5-bisdiphosphate-2,3,4,6-tetrakisphosphate 5-diphosphatase activity	gene_02187	0	0
	GO:0061659	1	1	ubiquitin-like protein ligase activity	gene_07231	0	0
	GO:0061690	1	1	lipoamidase activity	gene_06298	0	0
	GO:0061711	1	1	N(6)-L-threonylcarbamoyladenine synthase activity	gene_05366	0	0
	GO:0102158	1	1	very-long-chain 3-hydroxyacyl-CoA dehydratase activity	gene_04897	0	0
	GO:0102343	1	1	3-hydroxy-arachidoyl-CoA dehydratase activity	gene_04897	0	0
	GO:0102344	1	1	3-hydroxy-behenoyl-CoA dehydratase activity	gene_04897	0	0
	GO:0102345	1	1	3-hydroxy-lignoceroyl-CoA dehydratase activity	gene_04897	0	0
	GO:0102500	1	1	beta-maltose 4-alpha-glucanotransferase activity	gene_08832	0	0
	GO:1990380	1	1	Lys48-specific deubiquitinase activity	gene_02214	0	0
	GO:1990605	1	1	GU repeat RNA binding	gene_03367	0	0
